# Supplementary material
Source: PubMed Central journal article supplement (PMC9078849)

**Table of Contents**

|                                                             |    |
|-------------------------------------------------------------|----|
| Materials and Methods .....                                 | 1  |
| Figure S1 – Selected Variable Temperature NMR Spectra ..... | 3  |
| Preparation of Trityl Hydrazones .....                      | 4  |
| Reductive Chlorination of Trityl Hydrazones .....           | 10 |
| Reductive Bromination of Trityl Hydrazones .....            | 14 |
| Experimental Spectra .....                                  | 16 |

**Materials and Methods**

Unless stated otherwise, reactions were performed under a N<sub>2</sub> atmosphere using flame- or oven-dried glassware and stir bars. Ambient temperature refers to 22-26 °C. Higher than ambient temperatures were maintained using pre-heated oil baths. Lower temperatures were maintained using the following dewar baths: MeCN/CO<sub>2(s)</sub> (-40 °C) and MeOH/ice (-20 °C). Dichloromethane and tetrahydrofuran (both of Optima® grade) were purchased from Fisher Scientific and dried by passage through an activated alumina column solvent purification system (Innovative Technology Inc. Pure Solv™). Cyclohexane (anhydrous, 99.5%) was purchased from Sigma-Aldrich and used as received. Commercially obtained reagents were used as received, unless stated otherwise. *tert*-Butyl hypochlorite (> 98.0%) and tricyclo[5.2.1.0<sup>2,6</sup>]decan-8-one (> 95.0%, GC) were purchased from TCI America. Dess-Martin periodinane (97%) and dichloramine-T (97%) were purchased from Sigma-Aldrich. *N*-bromosuccinimide was recrystallized from H<sub>2</sub>O and dried overnight under high vacuum. *n*-Butyllithium was purchased from Sigma-Aldrich and titrated using menthol/2,2'-bipyridine. Ethanethiol was degassed by three freeze-pump-thaw (FPT) cycles and stored in a Schlenk flask under a N<sub>2</sub> atmosphere; this reagent was degassed by one cycle of FPT prior to each usage. Tritylhydrazide hydrochloride was prepared according to the procedure of Baldwin *et al.*,<sup>1</sup> using hydrazine monohydrate (Sigma-Aldrich, reagent grade, 98%) and ca. 0.90-0.95 equiv. HCl (Fisher Scientific, Certified ACS Plus).

Reactions and compounds were visualized on EMD Millipore silica gel 60 Å F254 plates by UV fluorescence quenching (254 nm), I<sub>2</sub>/SiO<sub>2</sub>, PMA, or Seebach's stain. Flash column chromatography was performed on SiliCycle SiliaFlash P60 (40-63 μm particle size) using ACS or HPLC grade solvents

<sup>1</sup> Baldwin, J. E.; Adlington, R. M.; Bottaro, J. C.; Kolhe, J. N.; Newington, I. M.; Perry, M. W. D. *Tetrahedron* **1986**, *42*, 4235.

purchased from Fisher Scientific.  $^1\text{H}$  and  $^{13}\text{C}$  NMR spectra were measured on Bruker DRX-500 and DMX-500 spectrometers (at 500 MHz and 125 MHz, respectively) at 294-300 K.  $^1\text{H}$  spectra were calibrated from internal standard TMS ( $\delta$  0.0) or solvent resonance ( $\text{CHCl}_3$ : 7.26,  $\text{C}_6\text{D}_6$ : 7.16).  $^{13}\text{C}$  spectra were calibrated from solvent resonance ( $\text{CHCl}_3$ : 77.0). NMR data are reported as: chemical shift ( $\delta$  ppm) (multiplicity, coupling constant (Hz), and integration).  $^{13}\text{C}$  chemical shifts arising from  $^{37}\text{Cl}/^{35}\text{Cl}$  isotope effects are indicated in parentheses.<sup>2</sup> High-resolution mass spectral analysis was measured on an Agilent Technologies 6224 TOF LC/MS (electrospray ionization). IR spectra were measured on Nicolet 6700 FTIR spectrometer and are reported as frequency of absorption ( $\text{cm}^{-1}$ ). Optical rotations were measured on a Perkin Elmer 141 polarimeter using a 100 mm path-length cell.

---

<sup>2</sup> Aliev, A. E.; Harris, K. D. M. *Magn. Reson. Chem.* **1993**, *31*, 54.

**Figure S1 – Selected Variable Temperature NMR Spectra**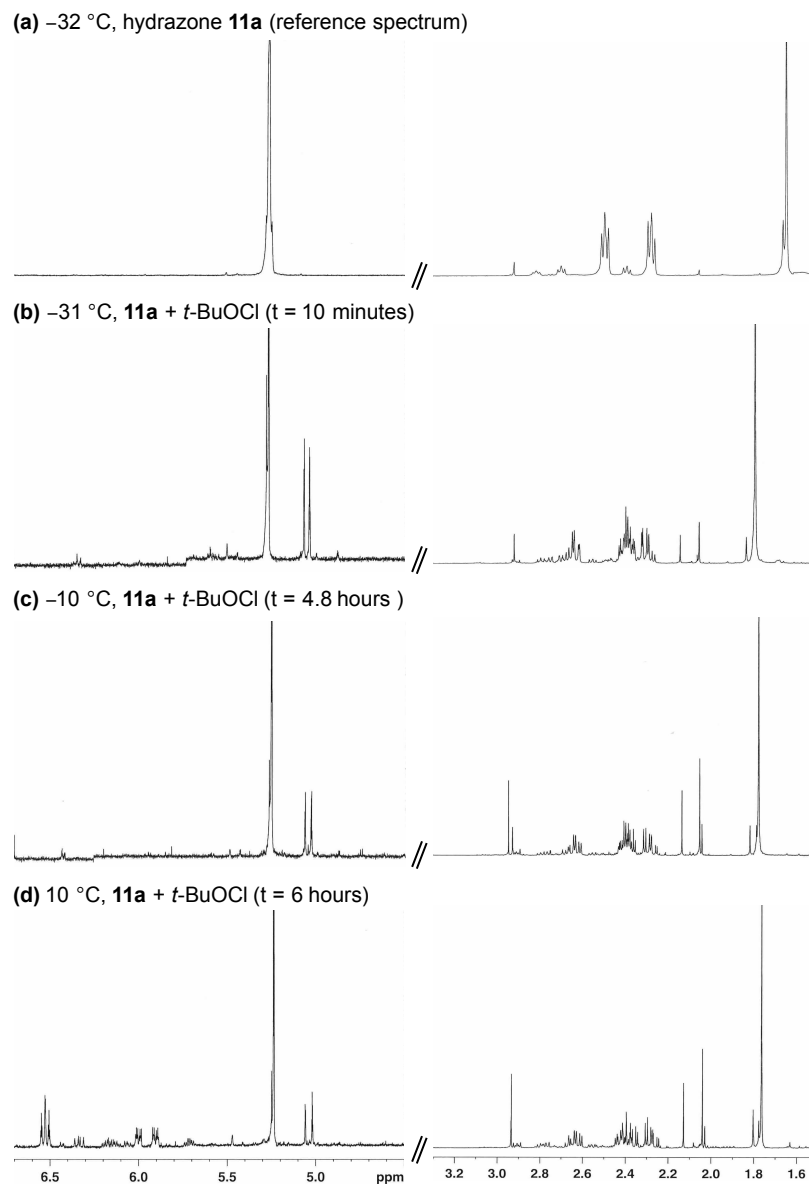

**Figure S1.**  $^1\text{H}$  NMR evolution of **11a** + *t*-BuOCl (ca. 1.1 equiv.) in the absence of EtSH ( $\text{CD}_2\text{Cl}_2$ ); Time ( $t$ ) from addition of *t*-BuOCl at  $-78\text{ }^{\circ}\text{C}$ . (a) Spectrum of hydrazone **11a** at  $-32\text{ }^{\circ}\text{C}$ . (b) **11a** + *t*-BuOCl following injection into  $-31\text{ }^{\circ}\text{C}$  pre-cooled probe. (c) Reaction warmed to  $-10\text{ }^{\circ}\text{C}$  without appreciable change. (d) Marked decomposition at  $10\text{ }^{\circ}\text{C}$ .

### Preparation of Trityl Hydrazones

*Note:* The hydrazones are prone to decomposition in the presence of air at ambient temperature. Storage under an inert atmosphere at  $-20\text{ }^{\circ}\text{C}$  is recommended. Trityl hydrazones are promptly subjected to halogenation conditions and are used without purification.

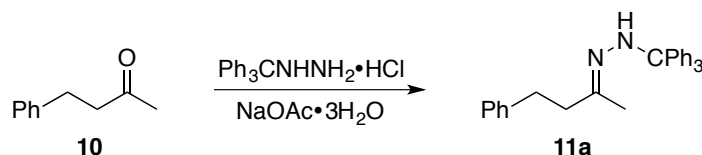

**Representative Procedure:** A 50 mL 14/20 recovery flask equipped with a 1-inch oval-shaped Teflon-coated magnetic stir bar was charged with  $\text{Ph}_3\text{CNHNH}_2\cdot\text{HCl}$  (1.01g, 3.25 mmol, 1.0 equiv.) and MeOH (11 mL). The resulting light orange solution was then treated with  $\text{NaOAc}\cdot 3\text{H}_2\text{O}$  (3.24M in  $\text{H}_2\text{O}$ , 1.5 mL, 4.86 mmol, 1.5 equiv.), and a color change to light yellow is observed. Benzylacetone (475 mg, 3.21 mmol, 1.0 equiv.) dissolved in 0.5 mL DCM (Fisher Scientific, Certified ACS, stabilized) was added, and the reaction immediately turned cloudy. Ketone addition was quantitated with additional DCM (2 x 0.5 mL), and the system was subsequently evacuated and backfilled with  $\text{N}_2$  three times. Under increased  $\text{N}_2$  flow, the reaction was stirred overnight at ambient temperature as vigorously as possible ( $> 600$  rpm), away from light, and under a stream of  $\text{N}_2$ . The resulting white slurry was filtered using a Büchner funnel, and the hydrazone was washed sequentially with  $\text{H}_2\text{O}$  then MeOH. After drying on high vacuum (2 mmHg), **11a** was obtained as an off-white solid (953 mg, 2.36 mmol, 74% yield).  $^1\text{H}$  NMR (500 MHz,  $\text{CDCl}_3$ ):  $\delta$  7.36-7.11 (m, 18H), 7.05-7.00 (m, 2H) 5.41 (bs, 1H), 2.62-2.55 (m, 2H), 2.43-2.36 (m, 2H), 1.70 (s, 3H);  $^{13}\text{C}$  NMR (125 MHz,  $\text{CDCl}_3$ ):  $\delta$  147.6, 146.1, 142.1, 129.2, 128.3, 128.1, 127.6, 126.4, 125.6, 72.6, 40.4, 32.7, 15.0; IR (Neat film): 1492, 1448, 749, 699  $\text{cm}^{-1}$ ; HRMS (ES) calcd for  $\text{C}_{29}\text{H}_{28}\text{N}_2$   $[\text{M}+\text{H}]^+$ : 405.2325, found 405.2316.

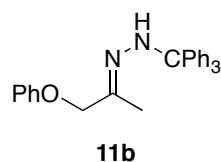

From phenoxyacetone (231 mg, 1.54 mmol), trityl hydrazone **11b** was obtained as a white solid (390 mg, 0.96 mmol, 62% yield).  $^1\text{H}$  NMR (500 MHz,  $\text{CDCl}_3$ ):  $\delta$  7.35-7.20 (m, 15H), 7.19-7.13 (m, 2H), 6.88 (tt,  $J = 1.0, 7.5$  Hz, 1H), 6.79-6.73 (m, 2H), 5.71 (bs, 1H), 4.46 (s, 2H), 1.81 (s, 3H);  $^{13}\text{C}$  NMR (125 MHz,  $\text{CDCl}_3$ ):  $\delta$  158.6, 145.9, 144.0, 129.3, 129.1, 127.7, 126.7, 120.6, 115.0, 72.7, 72.2, 11.7; IR

(Neat film): 3058, 1598, 1494, 1447, 1213, 1172, 1079, 1031, 901, 754, 701  $\text{cm}^{-1}$ ; HRMS (ES) calcd for  $\text{C}_{28}\text{H}_{26}\text{N}_2\text{O}$   $[\text{M}+\text{H}]^+$ : 407.2118, found 407.2114.

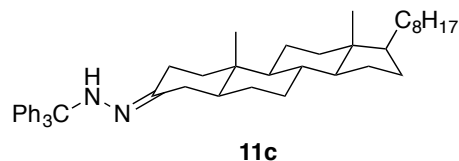

From cholestanone (307 mg, 0.79 mmol), trityl hydrazone **11c** was obtained as a yellow solid as a crude mixture of hydrazone isomers (399 mg, 0.62 mmol, 78% yield). This mixture was deemed acceptably pure and was subsequently subjected to chlorinative conditions. Diagnostic NMR signals:  $^1\text{H}$  NMR (500 MHz,  $\text{CDCl}_3$ , \* denotes isomeric signal):  $\delta$  7.50-7.00 (m, 15H + 15H\*), 5.53 (bs, 1H), 5.53 (bs, 1H\*);  $^{13}\text{C}$  NMR (125 MHz,  $\text{CDCl}_3$ ):  $\delta$  152.6, 152.4\*, 72.7, 72.7\*.

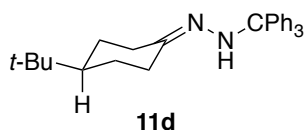

From 4-*tert*-butylcyclohexanone (482 mg, 3.12 mmol), trityl hydrazone **11d** was obtained as a white/light yellow solid (962 mg, 2.34 mmol, 75% yield).  $^1\text{H}$  NMR (500 MHz,  $\text{CDCl}_3$ ):  $\delta$  7.39-7.34 (m, 6H), 7.29-7.24 (m, 6H), 7.23-7.17 (m, 3H), 5.53 (bs, 1H), 2.71-2.64 (m, 1H), 2.29-2.21 (m, 1H), 1.96 (app td,  $J = 5.0, 13.5$  Hz, 1H), 1.83-1.70 (m, 2H), 1.62 (app td,  $J = 5.0, 13.5$  Hz, 1H), 1.16 (app tt,  $J = 3.0, 12.0$  Hz, 1H), 0.96-0.80 (m, 2H), 0.81 (s, 9H);  $^{13}\text{C}$  NMR (125 MHz,  $\text{CDCl}_3$ ):  $\delta$  153.2, 145.9, 129.2, 127.6, 126.4, 72.8, 47.4, 35.3, 32.5, 27.8, 27.5, 26.6, 24.8; IR (Neat film): 3507, 2954, 1716, 1491, 1447, 1366, 1221, 1034, 905, 759, 700  $\text{cm}^{-1}$ ; HRMS (ES) calcd for  $\text{C}_{29}\text{H}_{34}\text{N}_2$   $[\text{M}+\text{H}]^+$ : 411.2795, found 405.2788.

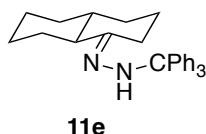

From *trans*-1-decalone (242 mg, 1.59 mmol), trityl hydrazone **11e** was obtained as a white/light yellow solid (408 mg, 1.00 mmol, 63% yield).  $^1\text{H}$  NMR (500 MHz,  $\text{CDCl}_3$ ):  $\delta$  7.36-7.31 (m, 6H), 7.28-7.23 (m, 6H), 7.23-7.18 (m, 3H), 5.58 (bs, 1H), 2.76-2.68 (m, 1H), 1.82-1.75 (m, 1H), 1.68-1.51 (m, 7H), 1.28-0.80 (m, 7H);  $^{13}\text{C}$  NMR (125 MHz,  $\text{CDCl}_3$ ):  $\delta$  153.6, 146.2, 129.4, 127.4, 126.3, 72.9, 49.5, 44.4,

34.4, 33.7, 27.1, 26.1, 26.1, 25.6, 24.9; IR (Neat film): 3057, 2924, 2851, 1597, 1491, 1446, 1033, 905, 731, 700  $\text{cm}^{-1}$ ; HRMS (ES) calcd for  $\text{C}_{29}\text{H}_{32}\text{N}_2$   $[\text{M}+\text{H}]^+$ : 409.2638, found 409.2633.

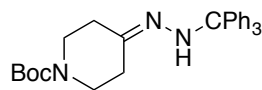**11f**

From *N*-Boc-4-piperidone, trityl hydrazone **11f** was obtained as a white solid with a 7 mol % impurity, whose identity is assigned to that of corresponding azine *i*. The hydrazone was used without further purification.  $^1\text{H}$  NMR (500 MHz,  $\text{CDCl}_3$ ):  $\delta$  7.37-7.31 (m, 6H), 7.31-7.24 (m, 6H), 7.24-7.19 (m, 3H), 5.54 (bs, 1H), 3.49-3.39 (m, 2H), 3.39-2.29 (m, 2H), 2.37-2.20 (m, 4H), 1.45 (s, 9H).

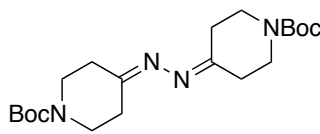**i**

A 10 mL 14/20 recovery flask equipped a Teflon-coated magnetic stir bar was charged sequentially with *N*-Boc-4-piperidone (246 mg, 1.23 mmol, 1 equiv.), EtOH (1.25 mL), and  $\text{NH}_2\text{NH}_2\cdot\text{H}_2\text{O}$  (0.03 mL, 0.62 mmol, 0.5 equiv.), and heated to reflux for 7 hours with an attached condenser. Following filtration through a Büchner funnel, washing with EtOH, and drying under high vacuum for 2 hours, azine *i* was obtained as a white solid (182 mg, 0.46 mmol, 75% yield).  $^1\text{H}$  NMR (500 MHz,  $\text{CDCl}_3$ ):  $\delta$  3.61 (t,  $J = 6.0$  Hz, 4H), 3.52 (t,  $J = 6.0$  Hz, 4H), 2.57 (t,  $J = 6.0$ , 4H), 2.45 (t,  $J = 6.0$  Hz, 4H), 1.48 (s, 18H);  $^{13}\text{C}$  NMR (125 MHz,  $\text{CDCl}_3$ ):  $\delta$  163.6, 154.6, 78.0, 44.1, 42.5, 34.5, 28.4, 28.1; IR (Neat film): 1683, 1431, 1364, 1240, 1179  $\text{cm}^{-1}$ ; HRMS (ES) calcd for  $\text{C}_{20}\text{H}_{34}\text{N}_4\text{O}_4$   $[\text{M}+\text{H}]^+$ : 395.2653, found 395.2659.

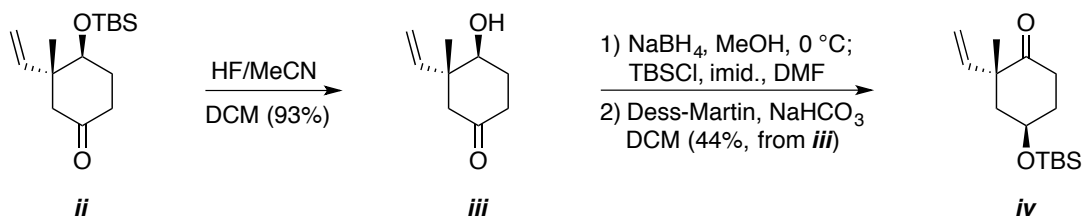

A 500 mL 24/40 round-bottom flask equipped with a Teflon-coated magnetic stir bar was charged with ketone **ii** (0.52 g, 1.94 mmol, 1 equiv.) and DCM (200 mL). The resulting solution was then treated with 80 mL of a 10% solution of HF in MeCN and stirred at ambient temperature for 21.5 hours. The reaction was carefully quenched with a total of 120 mL saturated aqueous  $\text{NaHCO}_3$ . In a 500 mL

separatory funnel, the reaction was partitioned between 30 mL saturated aqueous NaHCO<sub>3</sub> and 30 mL DCM. The aqueous layer was separated and extracted twice more with 40 mL portions of DCM. The combined organic layers were washed with 80 mL brine and dried over MgSO<sub>4</sub>. Flash chromatography (2:3 hexanes:EtOAc) afforded alcohol **iii** as clear, light yellow liquid (0.28 g, 1.82 mmol, 93% yield).  $R_f = 0.30$  (1:1 hexanes:EtOAc); <sup>1</sup>H NMR (500 MHz, CDCl<sub>3</sub>): δ 5.75 (dd,  $J = 11.0, 17.5$  Hz, 1H), 5.14 (dd,  $J = 1.0, 11.0$  Hz, 1H), 5.10 (dd,  $J = 1.0, 17.5$  Hz, 1H), 3.84 (app td,  $J = 3.5, 7.0$  Hz, 1H), 2.52 (dddd,  $J = 2.0, 6.5, 8.5, 15.0$  Hz, 1H), 2.44 (dd,  $J = 1.5, 14.5$  Hz, 1H), 2.38 (dd,  $J = 1.0, 14.5$  Hz, 1H), 2.30 (dddd,  $J = 1.5, 6.0, 7.5, 15.0$  Hz, 1H), 2.11 (dddd,  $J = 3.5, 6.0, 8.0, 14.0$ , 1H) 1.98-1.87 (m, 2H); <sup>13</sup>C NMR (125 MHz, CDCl<sub>3</sub>): δ 210.2, 143.8, 114.7, 72.2, 48.0, 45.7, 36.8, 28.9, 20.4; IR (Neat film): 3451, 2960, 1703, 1640, 1421, 1293, 1235, 1065, 1029, 969, 921 cm<sup>-1</sup>; HRMS (ES) calcd for C<sub>9</sub>H<sub>14</sub>O<sub>2</sub> [M+H]<sup>+</sup>: 155.1067, found 155.1063.

A 100 mL 14/20 recovery flask equipped with a Teflon-coated magnetic stir bar was charged with alcohol **iii** (0.83 g, 5.38 mmol, 1 equiv.) and MeOH (22 mL). The solution was cooled in an ice bath and subsequently treated with NaBH<sub>4</sub> (0.63 g, 16.65 mmol, 3 equiv.). After 2 hours, the reaction was quenched with 35 mL saturated aqueous NH<sub>4</sub>Cl. In a 500 mL separatory funnel, the reaction was extracted into DCM (4 x 75 mL). The combined organic layers were dried over Na<sub>2</sub>SO<sub>4</sub> and concentrated. The crude diol was subsequently dissolved in DMF (27 mL) and treated with imidazole (0.73 g, 10.76 mmol, 2 equiv.) and TBSCl (0.83 g, 5.51 mmol, 1 equiv.). After stirring for 12.5 hours at ambient temperature, the reaction was quenched with 100 mL saturated aqueous NH<sub>4</sub>Cl and extracted with 2:1 hexanes:EtOAc (3 x 75 mL). The combined organics were washed with H<sub>2</sub>O (2 x 50 mL), brine (50 mL), and dried over MgSO<sub>4</sub>. The crude residue was subjected to careful flash chromatography (two successive columns – first using 3:1 hexanes:Et<sub>2</sub>O, then a second using 85:15 hexanes:EtOAc) to give 0.79 g of a 10:1 diastereomeric mixture of mono-silylated diol as a clear, light yellow liquid (2.92 mmol, 54% yield over 2 steps). A 100 mL 14/20 recovery flask equipped with a Teflon-coated magnetic stir was charged with the previously purified mono-silylated diol, DCM (29 mL), NaHCO<sub>3</sub> (0.76g, 9.05 mmol, 3.1 equiv.), and Dess-Martin periodinane (1.86 g, 4.38 mmol, 1.5 equiv.). After stirring at ambient temperature for 2.5 hours, the reaction was partitioned between 50 mL saturated aqueous NaHCO<sub>3</sub> and 50 mL DCM. The aqueous layer was separated, extracted with DCM (2 x 40 mL), and dried over Na<sub>2</sub>SO<sub>4</sub>. The crude residue was then subjected to careful flash chromatography (95:5 hexanes:Et<sub>2</sub>O) to yield ketone **iv** as a single diastereomer (0.64 g, 2.38 mmol, 82% yield).  $R_f =$

0.70 (3:1 hexanes:Et<sub>2</sub>O); <sup>1</sup>H NMR (500 MHz, CDCl<sub>3</sub>): δ 5.90 (dd, *J* = 11.0, 17.5 Hz, 1H), 5.14 (d, *J* = 11.0 Hz, 1H), 5.00 (d, *J* = 17.5 Hz, 1H), 4.19 (app tt, *J* = 4.0, 10.0 Hz, 1H), 2.56 (ddd, *J* = 6.0, 13.0, 14.5 Hz, 1H), 2.39 (app dt, *J* = 4.5, 14.5 Hz, 1H), 2.12 (ddd, *J* = 3.0, 4.0, 13.5, 1H), 2.10-2.03 (m, 1H), 1.75 (app t(dd), *J* = 4.5, 10.0, 13.0 Hz, 1H), 1.69 (dd, *J* = 10.0, 13.5 Hz, 1H), 1.16 (s, 3H), 0.90 (s, 9H), 0.10 (s, 3H), 0.09 (s, 3H); <sup>13</sup>C NMR (125 MHz, CDCl<sub>3</sub>): δ 211.9, 142.6, 114.8, 66.5, 51.3, 47.4, 36.3, 35.5, 25.8, 24.8, 18.1, -4.7, -4.7; IR (Neat film): 2886, 2858, 1716, 1631, 1472, 1463, 1426, 1370, 1325, 1257, 1106, 1073, 991, 940, 920, 889, 866, 837, 776 cm<sup>-1</sup>; HRMS (ES) calcd for C<sub>15</sub>H<sub>28</sub>O<sub>2</sub>Si [M+H]<sup>+</sup>: 269.1931, found 269.1926.

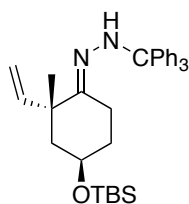**11g**

From ketone **iv** (199 mg, 0.74 mmol), trityl hydrazone **11g** was obtained as a white solid (255 mg, 0.49 mmol, 66% yield). <sup>1</sup>H NMR (500 MHz, CDCl<sub>3</sub>): δ 7.38-7.17 (m, 18H), 5.63 (bs, 1H), 5.58 (dd, *J* = 11.0, 17.5 Hz, 1H), 4.83 (dd, *J* = 1.0, 11.0 Hz, 1H), 4.52 (dd, *J* = 1.0, 17.5 Hz, 1H), 3.86 (app tt, *J* = 4.0, 10.5 Hz, 1H), 2.69-2.55 (m, 1H), 1.95-1.71 (m, 3H), 1.38-1.22 (m, 2H), 0.87 (s, 9H), 0.84 (s, 3H), 0.05 (s, 3H), 0.04 (s, 3H); <sup>13</sup>C NMR (125 MHz, CDCl<sub>3</sub>): δ 151.7, 146.1, 146.1, 129.3, 127.5, 126.4, 112.9, 73.1, 67.4, 48.0, 45.9, 34.6, 27.1, 25.9, 19.9, 18.1, -4.6, -4.6; IR (Neat film): 2929, 2856, 1714, 1491, 1448, 1254, 1105, 1073, 866, 836, 774, 701 cm<sup>-1</sup>; HRMS (ES) calcd for C<sub>34</sub>H<sub>44</sub>N<sub>2</sub>O<sub>2</sub>Si [M+H]<sup>+</sup>: 525.3296, found 525.3292.

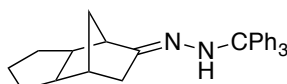**11h**

From tricyclo[5.2.1.0<sup>2,6</sup>]decan-8-one (478 mg, 3.18 mmol), trityl hydrazone **11h** was obtained as a white solid (1.047 g, 2.58 mmol, 81% yield). <sup>1</sup>H NMR (500 MHz, CDCl<sub>3</sub>): δ 7.39-7.32 (m, 6H), 7.30-7.23 (m, 6H), 7.23-7.17 (m, 3H) 5.16 (bs, 1H), 2.43 (bs, 1H), 2.19 (br d, *J* = 4.0 Hz, 1H), 1.94 (dd, *J* = 4.5, 15.5 Hz, 1H), 1.89-1.81 (m, 1H), 1.81-1.68 (m, 3H), 1.67-1.58 (m, 2H), 1.49-1.40 (m, 1H), 1.25-1.12 (m, 1H), 1.10 (br d, *J* = 10.5 Hz, 1H), 0.98-0.81 (m, 2H); <sup>13</sup>C NMR (125 MHz, CDCl<sub>3</sub>): δ 160.4, 145.8, 129.0, 127.7, 126.4, 72.8, 47.9, 47.1, 45.2, 40.1, 34.0, 32.4, 32.3, 31.2, 27.7; IR (Neat film): 3056, 2948, 2861, 1596, 1490, 1447, 1185, 1032, 902, 742, 701 cm<sup>-1</sup>; HRMS (ES) calcd for C<sub>29</sub>H<sub>30</sub>N<sub>2</sub> [M+H]<sup>+</sup>: 407.2482, found 407.2473.



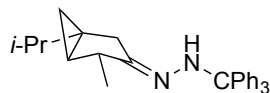**11i**

From (–)- $\alpha$ -thujone (484 mg, 3.18 mmol), trityl hydrazone **11i** was obtained as a light yellow solid (825 mg, 2.02 mmol, 64% yield).  $^1\text{H}$  NMR (500 MHz,  $\text{CDCl}_3$ ):  $\delta$  7.35-7.30 (m, 6H), 7.29-7.23 (m, 6H), 7.23-7.17 (m, 3H), 5.25 (bs, 1H), 2.44-2.36 (m, 1H), 2.19 (d,  $J = 16.5$  Hz, 1H), 2.10 (d,  $J = 16.5$  Hz, 1H), 1.30 (sept,  $J = 7.0$  Hz, 1H), 0.94 (d,  $J = 7.0$  Hz, 3H), 0.91 (d,  $J = 7.0$  Hz, 3H), 0.88 (d,  $J = 7.0$  Hz, 3H), 0.79 (dd,  $J = 4.0, 8.0$  Hz, 1H), 0.48-0.42 (m, 1H),  $-0.19$  (dd,  $J = 4.5, 4.5$  Hz, 1H);  $^{13}\text{C}$  NMR (125 MHz,  $\text{CDCl}_3$ ):  $\delta$  160.2, 145.9, 129.1, 127.7, 126.5, 72.9, 42.4, 32.5, 31.7, 27.9, 26.6, 21.5, 20.1, 19.7, 17.1; IR (Neat film): 2957, 1491, 1448, 1033, 759, 701  $\text{cm}^{-1}$ ; HRMS (ES) calcd for  $\text{C}_{29}\text{H}_{32}\text{N}_2$   $[\text{M}+\text{H}]^+$ : 409.2638, found 409.2630;  $[\alpha]^{21.1}_{\text{D}} +31.8^\circ$  ( $c$  1,  $\text{CHCl}_3$ ).

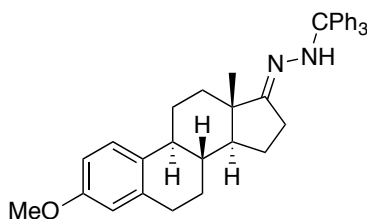**11j**

A 25 mL 14/20 recovery flask equipped with a Teflon-coated magnetic stir bar was charged with  $\text{Ph}_3\text{CNHNH}_2\cdot\text{HCl}$  (504 mg, 1.62 mmol, 1.0 equiv.) and MeOH (4 mL), and the resulting solution was then treated with  $\text{NaOAc}\cdot 3\text{H}_2\text{O}$  (3.27M in  $\text{H}_2\text{O}$ , 0.75 mL, 2.45 mmol, 1.5 equiv.). Following addition of *O*-Me estrone (453 mg, 1.59 mmol) and DCM (12 mL), the reaction vessel was evacuated, backfilled with  $\text{N}_2$ , and stirred at ambient temperature for two weeks. During this time period, an additional total of ca. 260 mg  $\text{Ph}_3\text{CNHNH}_2\cdot\text{HCl}$  was added. Conversion was monitored by  $^1\text{H}$  NMR. Following evaporation of DCM over a stream of  $\text{N}_2$ , workup as described in the Representative Procedure provided trityl hydrazone **11j** as a white solid (856 mg, 1.58 mmol, 99% yield).  $^1\text{H}$  NMR (500 MHz,  $\text{CDCl}_3$ ):  $\delta$  7.36-7.31 (m, 6H), 7.29-7.23 (m, 6H), 7.23-7.19 (m, 3H), 7.17 (d,  $J = 8.5$  Hz, 1H), 6.69 (dd,  $J = 2.5, 8.5$  Hz, 1H), 6.61 (d,  $J = 2.5$  Hz, 1H), 5.24 (bs, 1H), 2.92-2.78 (m, 2H), 2.29-2.05 (m, 4H), 1.95-1.85 (m, 2H), 1.85-1.77 (m, 1H), 1.49-1.31 (m, 4H), 1.27-1.13 (m, 2H), 0.67 (s, 3H);  $^{13}\text{C}$  NMR (125 MHz,  $\text{CDCl}_3$ ):  $\delta$  162.5, 157.4, 146.1, 137.8, 132.7, 129.3, 127.5, 126.4, 126.3, 113.7, 111.4, 72.9, 55.2, 52.6, 44.4, 44.2, 38.2, 34.3, 29.8, 27.2, 26.2, 24.9, 23.3, 17.0; IR (Neat film): 2928, 1609, 1498, 1448, 1255, 1033, 901, 747, 702  $\text{cm}^{-1}$ ; HRMS (ES) calcd for  $\text{C}_{38}\text{H}_{40}\text{N}_2\text{O}$   $[\text{M}+\text{H}]^+$ : 541.3213, found 541.3208;  $[\alpha]^{21.1}_{\text{D}} +37.3^\circ$  ( $c$  1,  $\text{CHCl}_3$ ).

**Reductive Chlorination of Trityl Hydrazones**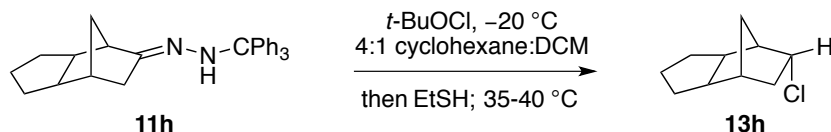

**Representative Procedure:** An oven-dried 25 mL 14/20 recovery flask equipped with a Teflon-coated magnetic stir bar was charged with trityl hydrazone **11h** (211 mg, 0.52 mmol, 1.0 equiv), DCM (1 mL), and cyclohexane (4 mL). The resulting colorless solution was evacuated and backfilled with N<sub>2</sub> (3 times) and then cooled to -20 °C (external temperature). *tert*-Butyl hypochlorite (1.24M in DCM, 0.46 mL, 1.1 equiv.) at ambient temperature was added dropwise over 2 minutes to the cooled solution of hydrazone and stirred for 15 minutes. The resulting yellow solution was then frozen in a liquid N<sub>2</sub> bath and degassed by two FPT cycles, each time thawing in a -20 °C bath. After backfilling with N<sub>2</sub>, the reaction was maintained at an external temperature  $\leq -15$  °C for at least 20 minutes. During this time EtSH was degassed once by FPT. Excess EtSH (3 mL) at ambient temperature was added to the cooled reaction without appreciable change, and the reaction flask was subsequently transferred to a pre-heated 35-40°C oil bath. After 1.5 hours, significant color dissipation was observed, and the reaction was allowed to cool to ambient temperature. In a 60 mL separatory funnel, the reaction was partitioned between 20 mL 1:1 H<sub>2</sub>O:brine and 20 mL 1:1 Et<sub>2</sub>O:pentane. The aqueous layer was separated and extracted once with 20 mL 1:1 Et<sub>2</sub>O:pentane. The combined organic layers were dried over Na<sub>2</sub>SO<sub>4</sub> and carefully concentrated under reduced pressure (ca. 140 mmHg). The crude residue was purified by flash chromatography (100% pentane) to afford chloride **13h** as a colorless oil with 21:1 dr, as measured by its <sup>1</sup>H NMR spectrum (73 mg, 0.43 mmol, 83% yield).  $R_f = 0.65$  (100% pentane); <sup>1</sup>H NMR (500 MHz, CDCl<sub>3</sub>):  $\delta$  4.22 (app dt,  $J = 4.0, 10.5$  Hz, 1H), 2.63-2.53 (m, 1H), 2.25-2.16 (m, 2H), 1.97 (bd,  $J = 5.0$  Hz, 1H), 1.96-1.85 (m, 3H), 1.70-1.62 (m, 1H), 1.49 (app d(dt),  $J = 2.0, 3.5, 11.0$  Hz 1H), 1.29-1.17 (m, 1H), 1.15 (app dt,  $J = 4.0, 13.5$  Hz, 1H), 1.10-1.05 (m, 1H), 1.02-0.86 (m, 2H); <sup>13</sup>C NMR (125 MHz, CDCl<sub>3</sub>):  $\delta$  (60.6, 60.6), 47.8, 47.7, 41.1, 40.5, 39.7, 32.4, 32.2, 31.8, 27.0; IR (Neat film): 2950, 2863, 1475, 1464, 1449, 1319, 1301, 1260, 953, 922, 888, 849, 767, 749, 674 cm<sup>-1</sup>; HRMS (ES) calcd for C<sub>10</sub>H<sub>15</sub>Cl [M+Cl]<sup>-</sup>: 205.0556, found 205.0550.

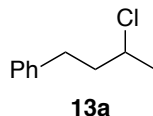

From hydrazone **11a** (405 mg, 1.00 mmol), chloride **13a** was obtained as a colorless oil (138 mg, 0.82 mmol, 82% yield) following purification by flash chromatography (99:1 pentane:EtOAc). Along with **13a**,  $\leq 4$  mol % diethyl disulfide present accounts for  $< 3$  wt % of the final product. The spectral data obtained are in accord with that in the literature.<sup>3</sup>

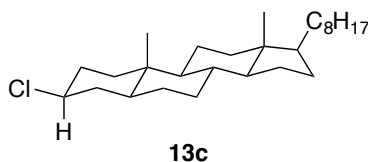

From hydrazone **11c** (209.5 mg, 0.3258 mmol), chloride **13c** was obtained as a white solid (75.3 mg, 0.1850 mmol, 57% yield) following purification by flash chromatography (100% hexanes). The spectral data obtained are in accord with that in the literature.<sup>4</sup>

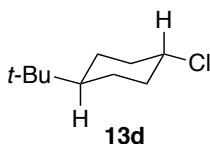

From hydrazone **11d** (234.6 mg, 0.571 mmol), chloride **13d** was obtained as a colorless oil (68.5 mg, 0.392 mmol, 69% yield) following purification by flash chromatography (100% pentane). The spectral data obtained are in accord with that in the literature.<sup>5</sup>

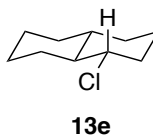

From hydrazone **11e** (238 mg, 0.58 mmol), chloride **13e** was purified by flash chromatography (100% pentane) and obtained as a colorless oil with 1.3:1 dr, as measured by its <sup>1</sup>H NMR spectrum (71 mg, 0.41 mmol, 71% yield).  $R_f = 0.66$  (100% pentane); <sup>1</sup>H NMR (500 MHz, CDCl<sub>3</sub>, \* denotes minor

<sup>3</sup> Gaspar, B.; Waser, J.; Carreira, E. M.; *Org. Synth.* **2010**, 87, 88.

<sup>4</sup> Mondal *et al.* *J. Org. Chem.* **2013**, 78, 2118.

<sup>5</sup> Iwasaki *et al.* *J. Am. Chem. Soc.* **2014**, 136, 1300.

diastereomer):  $\delta$  4.25-4.20 (m, 1H\*), 3.58 (ddd,  $J = 4.25, 10.35, 11.75$  Hz, 1H), 2.31-0.80 (m, 16H and 16H\*);  $^{13}\text{C}$  NMR (125 MHz,  $\text{CDCl}_3$ ):  $\delta$  (66.8, 66.6), (66.1, 66.1), 51.0, 47.4, 43.2, 38.1, 35.1, 34.9, 34.0, 33.8, 33.6, 33.2, 31.0, 30.7, 26.3, 26.3, 26.2, 26.0, 25.9, 20.0; IR (Neat film): 2928, 2854, 1447, 1257, 1231, 1030, 915, 737  $\text{cm}^{-1}$ ; HRMS (ES) calcd for  $\text{C}_{10}\text{H}_{17}\text{Cl}$  [ $\text{M}]^-$ : 172.1019, found 172.1023.

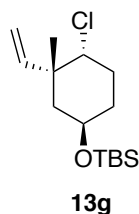

From hydrazone **11g** (220 mg, 0.42 mmol), chloride **13g** was purified by two successive columns (first using 4:1 hexanes: $\text{CHCl}_3$ , then a second using 9:1 hexanes:acetone) and obtained as a single diastereomer as a colorless oil (60 mg, 0.21 mmol, 50% yield). The crude  $^1\text{H}$  NMR indicated a dr of 2.8:1.  $R_f = 0.40$  (2:1 hexanes: $\text{CHCl}_3$ );  $^1\text{H}$  NMR (500 MHz,  $\text{CDCl}_3$ ):  $\delta$  6.13 (dd,  $J = 11.0, 18.0$  Hz, 1H), 5.20 (ddd,  $J = 0.5, 1.0, 11.0$  Hz, 1H), 5.15 (dd,  $J = 1.0, 17.5$  Hz, 1H), 3.82 (tt,  $J = 4.5, 10.5$  Hz, 1H), 3.76 (dd,  $J = 4.0, 12.0$  Hz, 1H), 2.11-1.98 (m, 2H), 1.95-1.86 (m, 1H), 1.85-1.73 (m, 1H), 1.44-1.32 (m, 2H), 1.17 (s, 3H), 0.87 (9H), 0.04 (s, 3H), 0.04 (s, 3H);  $^{13}\text{C}$  NMR (125 MHz,  $\text{CDCl}_3$ ):  $\delta$  140.3, 114.5, (69.0, 69.0), 66.6, 46.9, 43.0, 35.6, 31.7, 28.7, 25.8, 18.1, -4.7, -4.7; IR (Neat film): 2953, 2931, 2858, 1462, 1371, 1252, 1106, 1005, 917, 865, 836, 794, 775  $\text{cm}^{-1}$ ; HRMS (ES) calcd for  $\text{C}_{15}\text{H}_{29}\text{ClOSi}$  [ $\text{M}]^+$ : 288.1676, found 288.1662.

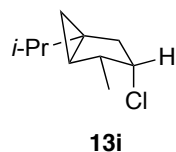

From hydrazone **11i** (240.1 mg, 0.588 mmol), chloride **13i** was purified by flash chromatography (100% pentane) and obtained as a colorless oil with 2.6:1 dr, as measured by its  $^1\text{H}$  NMR spectrum (71.3 mg, 0.413 mmol, 70% yield).  $R_f = 0.7$  (100% pentane);  $^1\text{H}$  NMR (500 MHz,  $\text{CDCl}_3$ , \* denotes minor diastereomer):  $\delta$  3.92 (app dt,  $J = 7.0, 10.5$ , 1H), 3.90-3.84 (m, 1H\*), 2.38 (ddd,  $J = 1.5, 8.0, 14.5$  Hz, 1H\*), 2.26 (dq,  $J = 7.0, 7.0$  Hz, 1H), 2.17 (qd,  $J = 3.0, 7.0$  Hz, 1H\*), 2.08 (dd,  $J = 7.5, 12.5$  Hz, 1H), 1.89 (dd,  $J = 1.0, 10.5$  Hz, 1H), 1.79 (dd,  $J = 3.5, 14.5$  Hz, 1H\*), 1.30 (sept,  $J = 7.0$  Hz, 1H), 1.28 (sept,  $J = 7.0$  Hz, 1H\*), 1.06 (d,  $J = 7.0$  Hz, 3H\*), 1.02 (d,  $J = 7.0$  Hz, 3H), 0.97 (d,  $J = 7.0$  Hz, 3H), 0.93 (d,  $J = 7.0$  Hz, 3H\*), 0.91 (d,  $J = 7.0$  Hz, 3H), 0.90 (d,  $J = 7.0$  Hz, 3H\*), 0.89-0.83 (m, 1H\*), 0.57 (ddd,  $J = 1.5, 5.0, 8.5$  Hz, 1H\*), 0.41 (dd,  $J = 4.0, 5.5$  Hz, 1H), 0.29 (ddd,  $J = 1.5, 5.5, 8.5$  Hz, 1H);  $^{13}\text{C}$  NMR

(125 MHz, CDCl<sub>3</sub>):  $\delta$  65.6, 66.6, 60.0, 60.0, 47.0, 38.2, 37.9, 35.1, 33.0, 32.3, 29.7, 28.4, 20.6, 20.1, 20.1, 19.7, 19.6, 18.9, 17.0, 13.49; IR (Neat film): 2959, 2872, 1456, 1375, 888, 846, 789 cm<sup>-1</sup>; HRMS (ES) calcd for C<sub>10</sub>H<sub>17</sub>Cl [M+Na]<sup>+</sup>: 195.0911, found 195.0911.

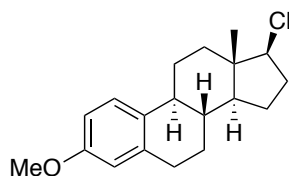**13j**

An oven-dried 25 mL 14/20 recovery flask equipped with a Teflon-coated magnetic stir bar was charged with trityl hydrazone **11j** (111 mg, 0.21 mmol, 1.0 equiv) and THF (2.5 mL) and subsequently evacuated and backfilled with N<sub>2</sub> (3 times). After cooling to -40 °C (external temperature), *n*-butyllithium (1.6M in hexanes, 0.14 mL, 1.1 equiv.) was added dropwise over 1 minute, and the resulting deep red-orange solution was stirred for an additional 30 minutes. An ambient temperature solution of dichloramine-T (60.6 mg, 0.25 mmol, 1.2 equiv.) in 0.6 mL THF was added dropwise over 1 minute to the cooled lithiated hydrazone, and immediate color dissipation to a light yellow solution was observed. After stirring for an addition 10 minutes, the reaction was frozen in a liquid N<sub>2</sub> bath and degassed by two FPT cycles, each time thawing in a -15 °C bath. After backfilling with N<sub>2</sub>, the reaction was maintained at external temperature  $\leq -15$  °C for 35 minutes. Excess EtSH (1.5 mL) at ambient temperature was added to the cooled reaction, and the reaction flask was subsequently transferred to a pre-heated 35-40°C oil bath. After 50 minutes, the reaction was allowed to cool to ambient temperature and subjected to workup as in the representative procedure for chlorination. The crude residue was purified by flash chromatography (3 successive columns – 9:1 hexanes:Et<sub>2</sub>O, 4:1 hexanes:CHCl<sub>3</sub>, 1:1 hexanes:CHCl<sub>3</sub>) to afford chloride **13j** as a white solid with a slight tint of yellow (42 mg, 0.14 mmol, 67% yield).  $R_f = 0.45$  (1:1 hexanes:CHCl<sub>3</sub>); <sup>1</sup>H NMR (500 MHz, C<sub>6</sub>D<sub>6</sub>):  $\delta$  7.12 (d,  $J = 8.5$  Hz, 1H), 6.79 (dd,  $J = 3.0, 8.5$  Hz, 1H), 6.70 (d,  $J = 3.0$  Hz, 1H), 3.51 (app t,  $J = 9.0$  Hz, 1H), 3.42 (s, 3H), 2.76-2.61 (m, 2H), 2.13-2.05 (m, 1H), 2.05-1.90 (m, 3H), 1.80-1.71 (m, 1H), 1.62-1.55 (m, 1H), 1.38-1.25 (m, 2H), 1.25-0.93 (m, 4H), 0.76 (s, 3H), 0.67 (ddd,  $J = 7.5, 11.0, 12.5$  Hz, 1H); <sup>13</sup>C NMR (125 MHz, CDCl<sub>3</sub>):  $\delta$  157.5, 137.8, 132.3, 126.3, 113.8, 111.5, 69.1, 55.2, 50.7, 44.5, 43.8, 39.4, 36.3, 32.0, 29.8, 27.4, 26.2, 23.7, 12.6; IR (Neat film): 2913, 1653, 1608, 1559, 1540, 1501, 1457, 1251, 1038, 859, 824 cm<sup>-1</sup>; HRMS (ES) calcd for C<sub>19</sub>H<sub>25</sub>ClO [M]<sup>+</sup>: 304.1594, found 304.1605;  $[\alpha]_D^{21.1} +82.0^\circ$  (*c* 1, CHCl<sub>3</sub>).

**Reductive Bromination of Trityl Hydrazones**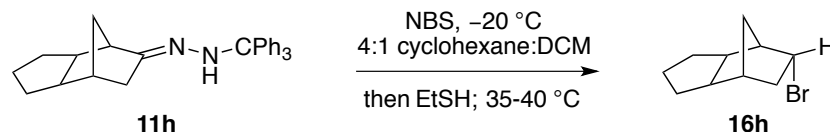

**Representative Procedure:** An oven-dried 25 mL 14/20 recovery flask equipped with a Teflon-coated magnetic stir bar was charged with trityl hydrazone **11h** (233 mg, 0.57 mmol, 1.0 equiv), DCM (1 mL), and cyclohexane (4 mL). The resulting colorless solution was evacuated and backfilled with N<sub>2</sub> (3 times) and then cooled to -20 °C (external temperature). *N*-bromosuccinimide (0.4M in THF, 1.1 equiv.) at ambient temperature was added dropwise over 2 minutes to the cooled solution of hydrazone and stirred for 15 minutes. The resulting yellow reaction was then frozen in a liquid N<sub>2</sub> bath and degassed by two FPT cycles, each time thawing in a -20 °C bath. After backfilling with N<sub>2</sub>, the reaction was maintained at an external temperature ≤ -15 °C for at least 20 minutes. During this time EtSH was degassed once by FPT. Excess EtSH (4 mL) at ambient temperature was added to the cooled reaction without appreciable change, and the reaction flask was subsequently transferred to a pre-heated 35-40 °C oil bath. After 1 hour, significant color dissipation was observed, and the reaction was allowed to cool to ambient temperature. In a 60 mL separatory funnel, the reaction was partitioned between 20 mL 1:1 H<sub>2</sub>O:brine and 20 mL 1:1 Et<sub>2</sub>O:pentane. The aqueous layer was separated and extracted once with 20 mL 1:1 Et<sub>2</sub>O:pentane. The combined organic layers were dried over Na<sub>2</sub>SO<sub>4</sub> and carefully concentrated under reduced pressure (ca. 140 mmHg). The crude residue was purified by flash chromatography (100% pentane) to afford bromide **16h** as a colorless oil (74 mg, 0.34 mmol, 60% yield). *R<sub>f</sub>* = 0.62 (100% pentane); <sup>1</sup>H NMR (500 MHz, CDCl<sub>3</sub>): δ 4.28 (app dt, *J* = 4.0, 10.5 Hz, 1H), 2.61-2.51 (m, 1H), 2.27 (ddd, *J* = 4.5, 10.5, 13.5, 1H), 2.22-2.18 (m, 1H), 1.97-1.84 (m, 4H), 1.70-1.62 (m, 1H), 1.46 (app d(dt), *J* = 2.0, 3.5, 10.5, 1H), 1.32 (ddd, *J* = 3.5, 4.0, 13.5, 1H), 1.29-1.17 (m, 1H), 1.12-1.06 (m, 1H), 1.01-0.87 (m, 2H); <sup>13</sup>C NMR (125 MHz, CDCl<sub>3</sub>): δ 53.5, 47.9, 47.8, 42.0, 41.1, 41.1, 32.3, 32.0, 32.0, 27.0; IR (Neat film): 2949, 2863, 1474, 1449, 1317, 1240, 1209, 952, 879, 759, 745, 634 cm<sup>-1</sup>; HRMS (ES) calcd for C<sub>10</sub>H<sub>15</sub>Br [M+<sup>81</sup>Br]<sup>-</sup>: 294.9526, found 294.9513.

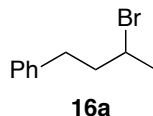

From hydrazone **11a** (147.1 mg, 0.3636 mmol), bromide **16a** was obtained as a colorless oil (50.1 mg, 0.2351 mmol, 65% yield) following purification by flash chromatography (100% pentane). The spectral data obtained are in accord with that in the literature.<sup>6</sup>

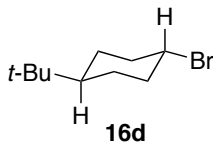

From hydrazone **11d** (246.8 mg, 0.6011 mmol), bromide **16d** was obtained as a colorless oil (91.5 mg, 0.4175 mmol, 69% yield) following purification by flash chromatography (100% pentane). The spectral data obtained are in accord with that in the literature.<sup>5</sup>

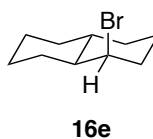

From hydrazone **11e** (204.6 mg, 0.5008 mmol), bromide **16e** was obtained as a colorless oil (52.8 mg, 0.2432 mmol, 49% yield) following purification by flash chromatography (100% pentane). <sup>1</sup>H NMR (500 MHz, CDCl<sub>3</sub>, \* denotes minor diastereomer): δ 4.45-4.41 (m, 1H), 3.79 (ddd, *J* = 4.5, 10.5, 12.0 Hz, 1H\*), 2.40-0.80 (m, 16H + 16H\*); <sup>13</sup>C NMR (125 MHz, CDCl<sub>3</sub>): δ 63.0, 61.5, 51.4, 47.6, 44.1, 39.4, 35.7, 35.6, 34.0, 33.9, 33.6, 33.4, 32.7, 32.5, 27.3, 26.5, 26.4, 26.2, 26.0, 20.8; IR (Neat film): 2925, 2853, 1447 cm<sup>-1</sup>; HRMS (ES) calcd for C<sub>10</sub>H<sub>17</sub>Br [M+H]<sup>+</sup>: 217.0586, found 217.0586.

<sup>6</sup> Dai *et al.* *Nat. Chem.* **2011**, 3, 140.

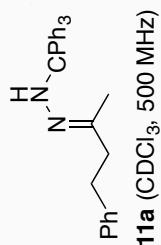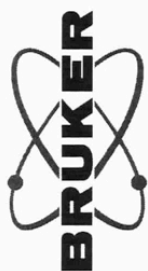

Current Data Parameters  
 NAME JRR-III-301A  
 EXPNO 1  
 PROCNO 1

F2 - Acquisition Parameters  
 Date\_ 20130707  
 Time 14.52  
 INSTRUM spect  
 PROBHD 5 mm PATXI 1H/  
 PULPROG zg  
 TD 5998  
 SOLVENT CDCl3  
 NS 8  
 DS 0  
 SWH 10000.000 Hz  
 FIDRES 0.166672 Hz  
 AQ 2.9999001 sec  
 RG 196.79  
 DW 50.000 usec  
 DE 10.00 usec  
 TE 295.0 K  
 D1 10.00000000 sec  
 TD0 1

===== CHANNEL f1 =====  
 SFO1 500.1330885 MHz  
 NUC1 1H  
 P1 8.00 usec  
 PLW1 12.1999981 W  
 F2 - Processing parameters  
 SI 65536  
 SF 500.1300166 MHz  
 WDW no  
 SSB 0  
 LB 0 Hz  
 GB 0  
 PC 1.00

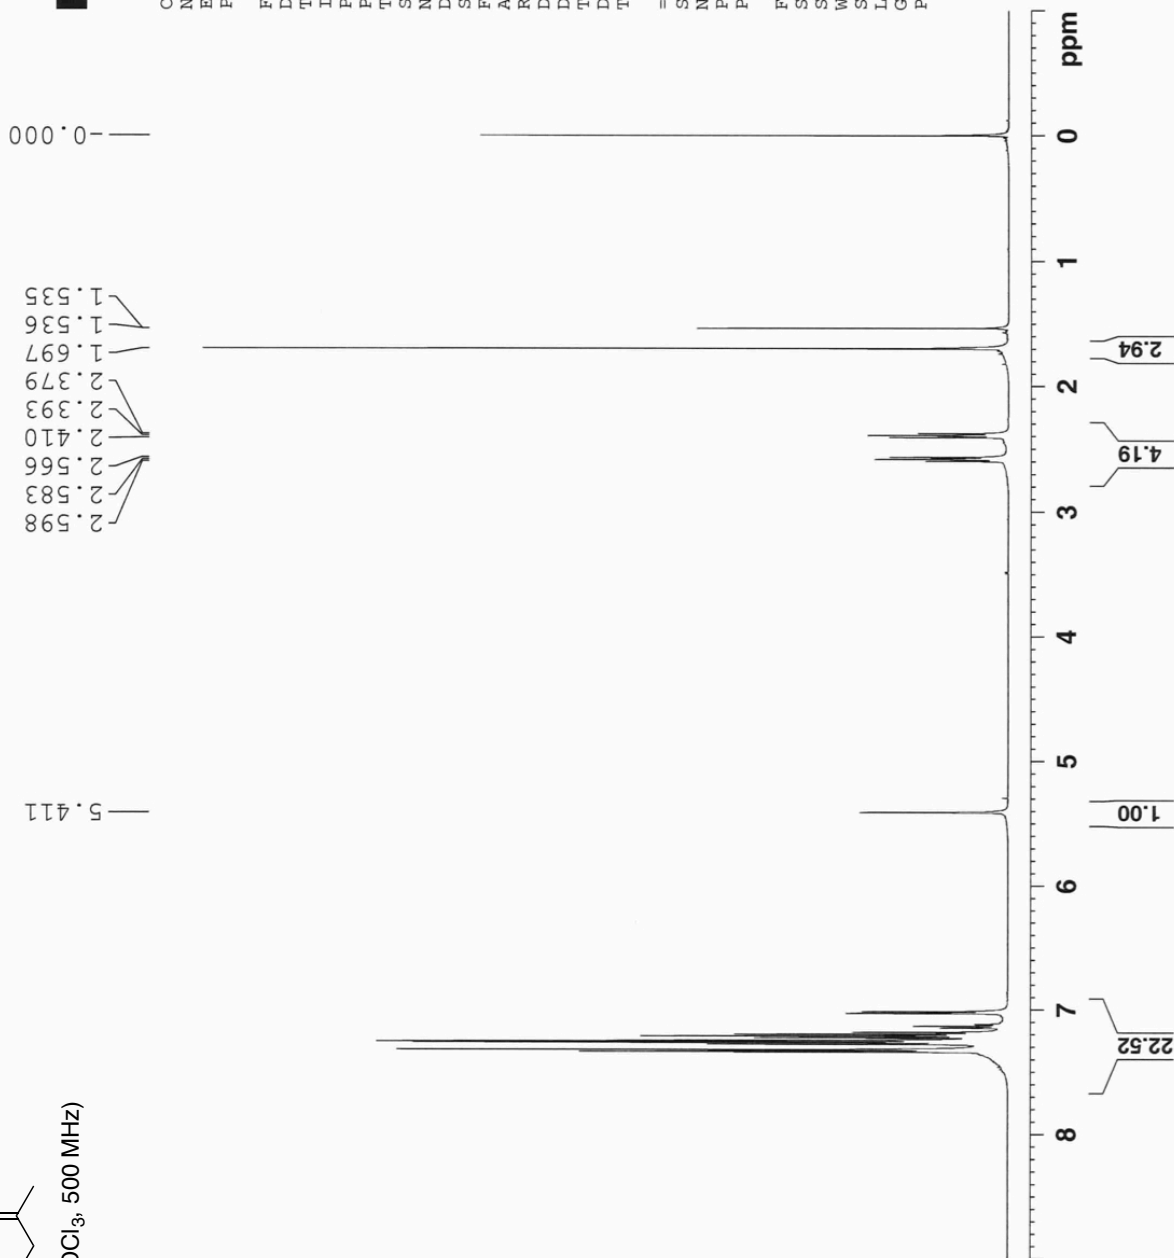



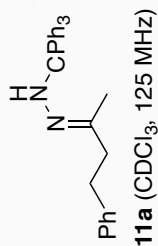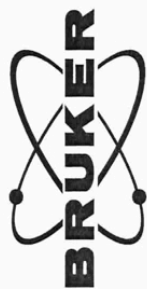

```

Current Data Parameters
NAME      JRR-III-301C
EXPNO     13
PROCNO    1

F2 - Acquisition Parameters
Date_     20130806
Time      9.45
INSTRUM   spect
PROBHD    5 mm QNP 1H/13
PULPROG   zgdc
TD         181814
SOLVENT   CDCl3
NS         216
DS         0
SWH        30303.031 Hz
FIDRES     0.166671 Hz
AQ         2.9999809 sec
RG         10321.3
DM         16.500 usec
DE         7.50 usec
TE         294.4 K
D1         1.00000000 sec
d11        0.03000000 sec
TD0        1

===== CHANNEL f1 =====
NUC1       13C
P1         8.50 usec
PL1        0.00 dB
SFO1       125.7062372 MHz

===== CHANNEL f2 =====
CPDPRG2    waltz16
NUC2       1H
PCPD2      90.00 usec
PL2        1.00 dB
PL12       21.00 dB
SFO2       499.8734991 MHz

F2 - Processing parameters
SI         65536
SF         125.6924332 MHz
WDW        no
SSB        0
LB         0.00 Hz
GB         0
PC         1.40
    
```

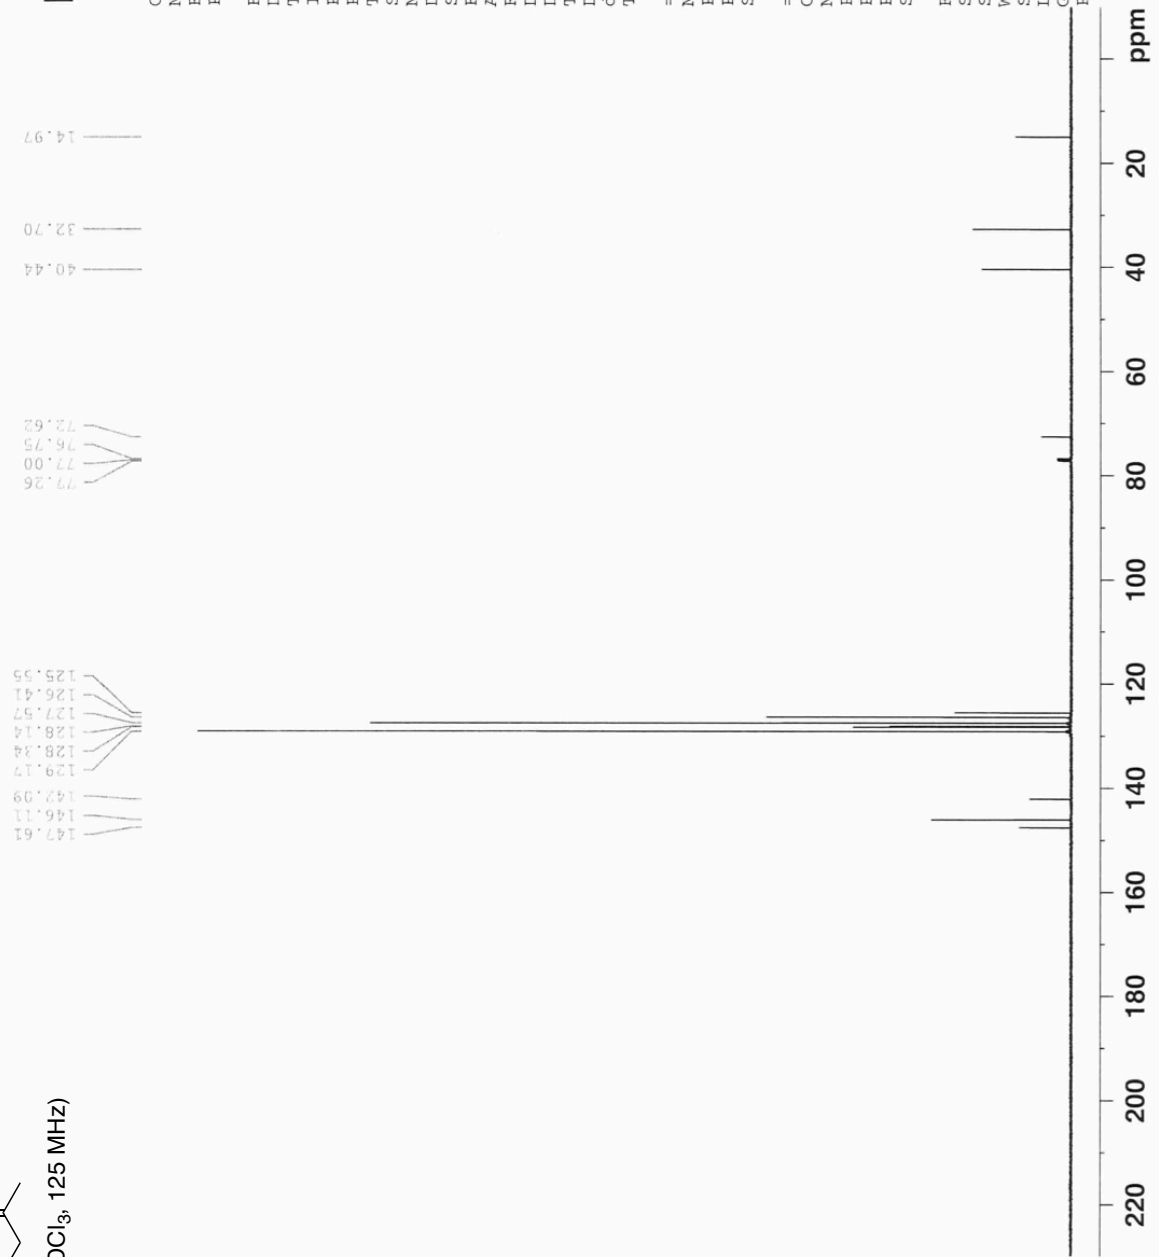

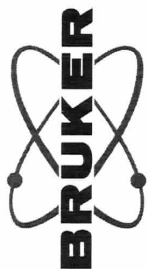

Current Data Parameters  
 NAME JRR-VIII-099A  
 EXNO 1  
 PROCNO 1

F2 - Acquisition Parameters  
 Date\_ 20151019  
 Time 10.00  
 INSTRUM spect  
 PROBHD 5 mm PATXI 1H/  
 PULPROG zg  
 TD 5998  
 SOLVENT CDC13  
 NS 8  
 DS 0  
 SWH 10000.000 Hz  
 FIDRES 0.166672 Hz  
 AQ 2.9999001 sec  
 RG 20.66  
 DW 50.000 usec  
 DE 10.00 usec  
 TE 295.2 K  
 D1 10.00000000 sec  
 TD0 1

==== CHANNEL f1 =====  
 SFO1 500.1330885 MHz  
 NUC1 1H  
 P1 8.00 usec  
 PLW1 12.1999981 W

F2 - Processing parameters  
 SI 65536  
 SF 500.1300364 MHz  
 WDW no  
 SSB 0  
 LB 0 Hz  
 GB 0  
 PC 1.00

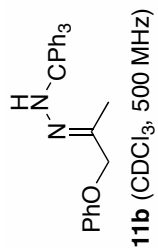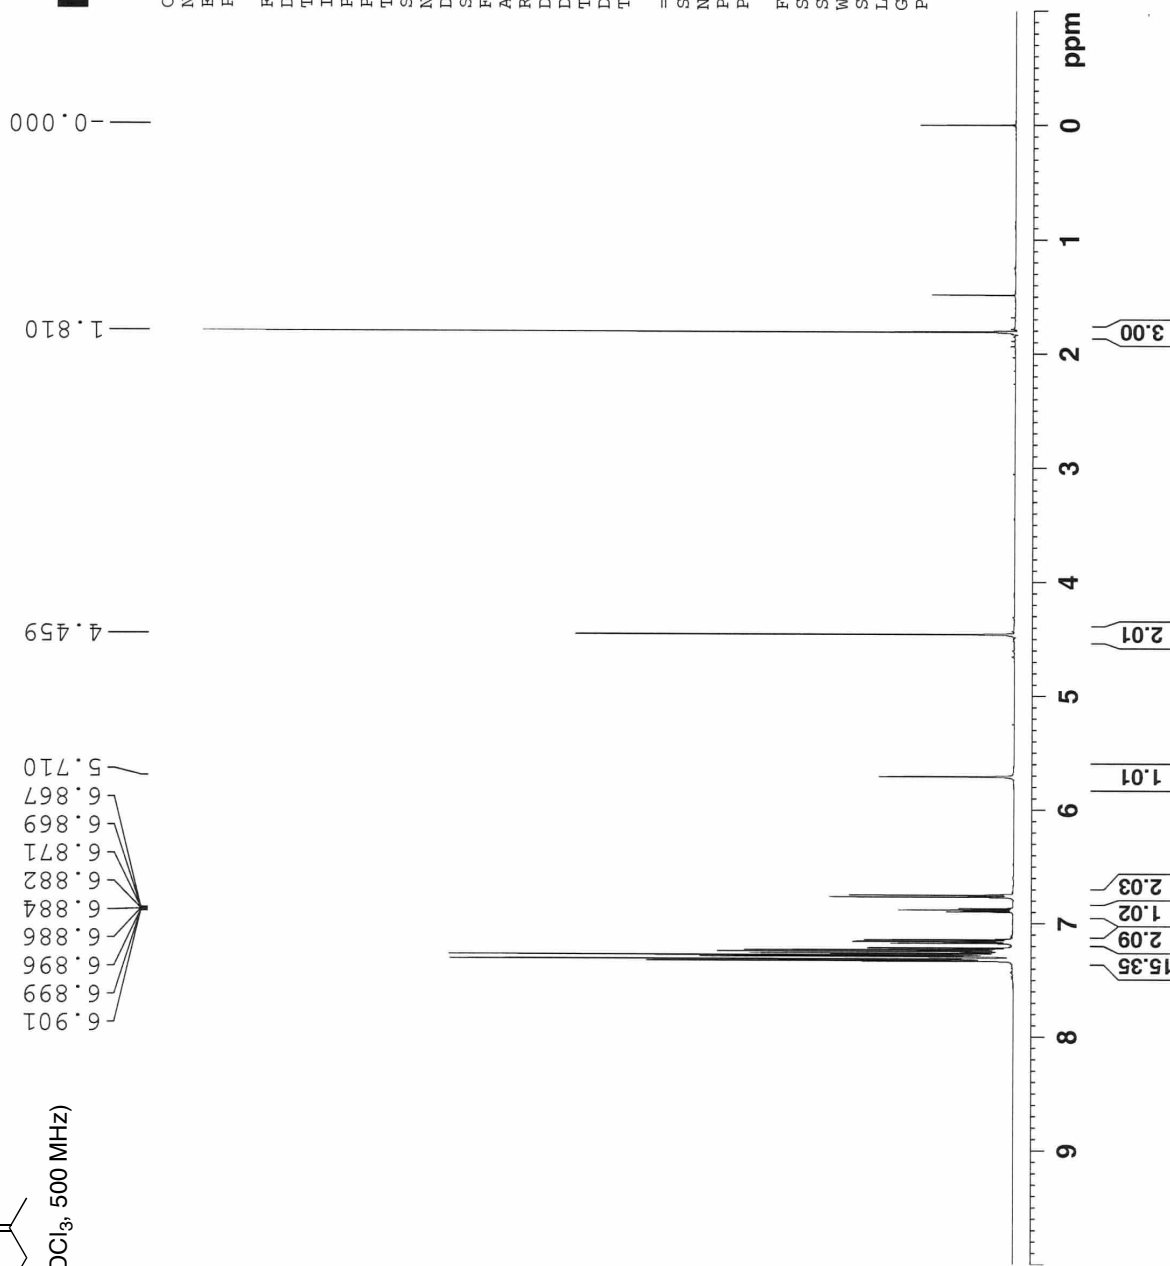

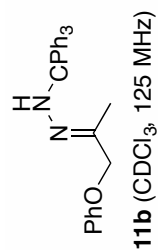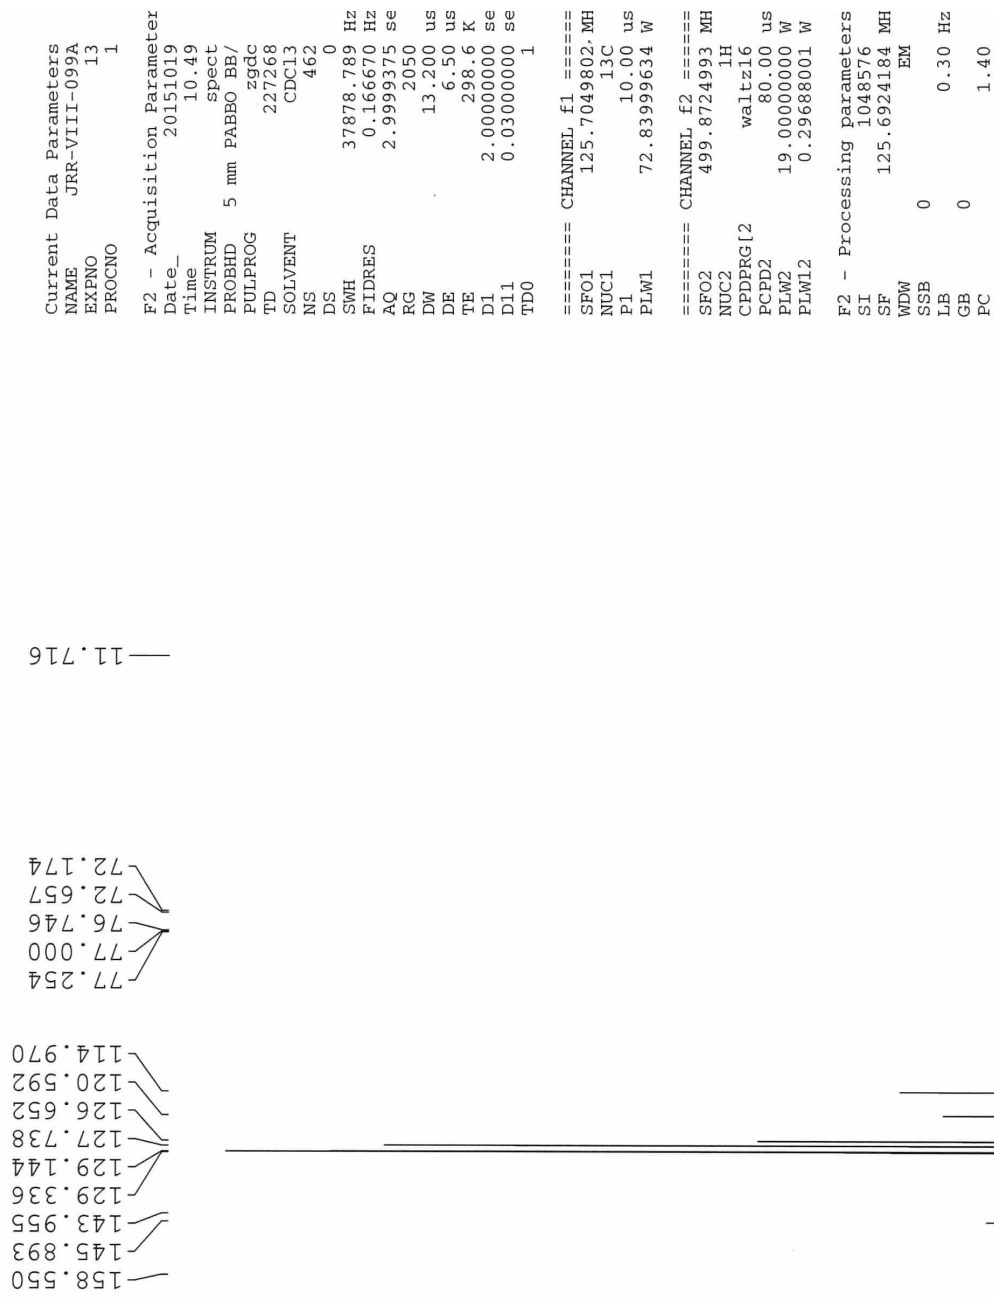

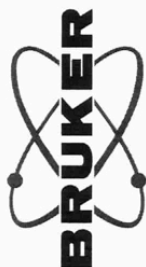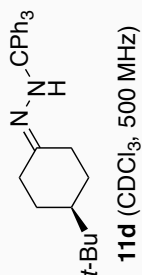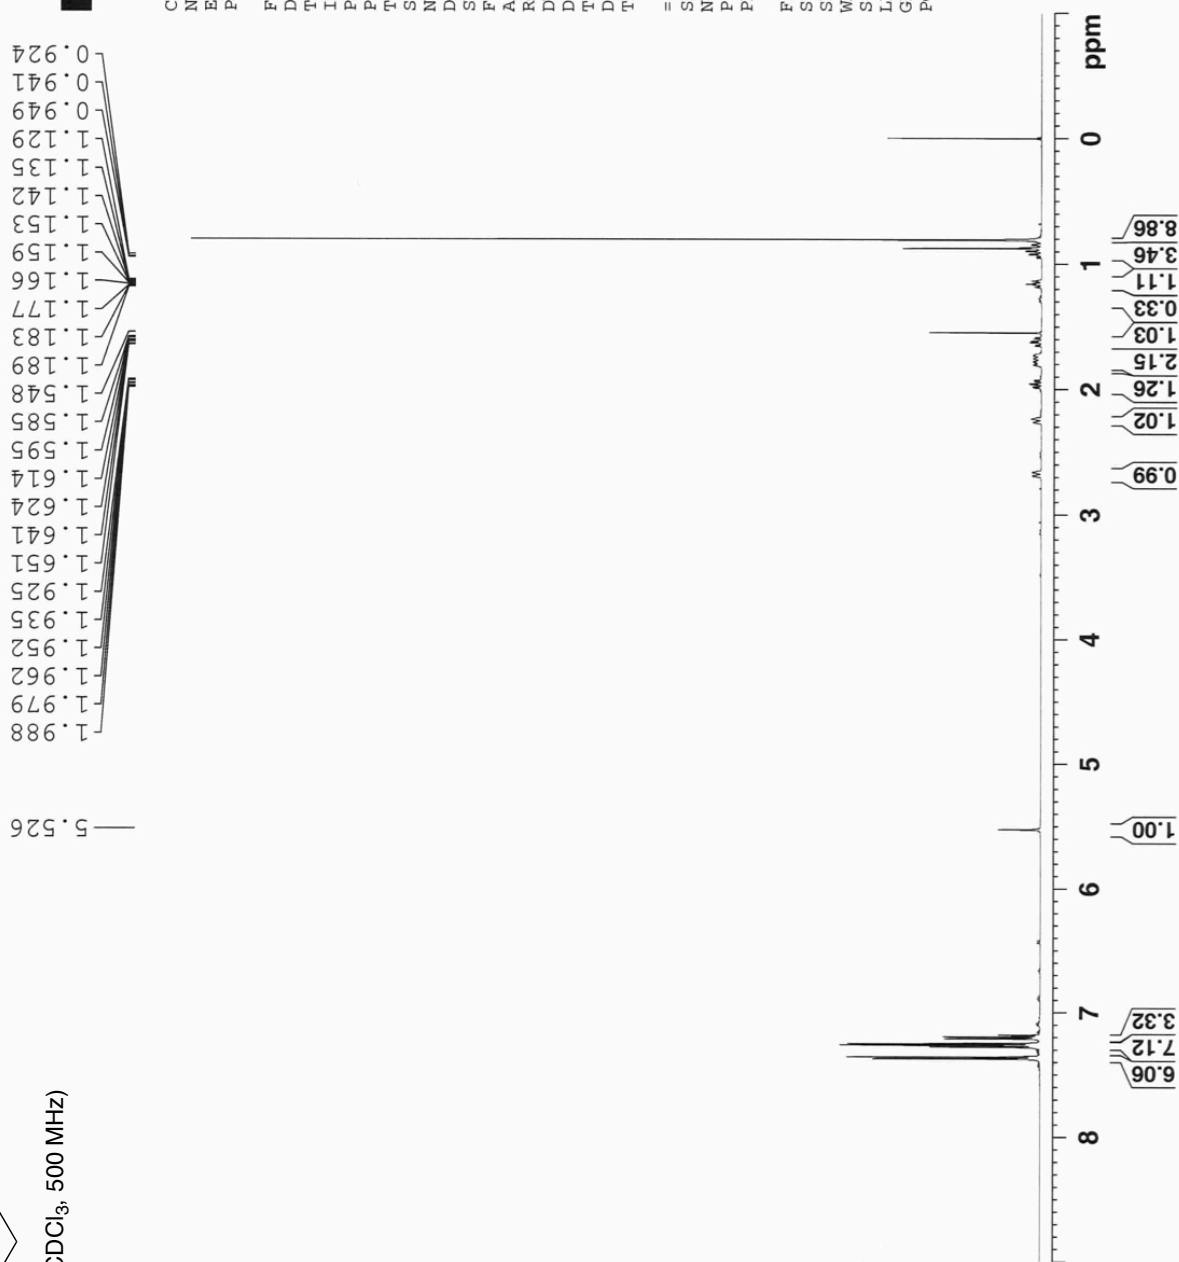

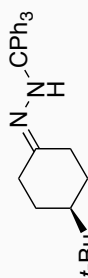

**11d** (CDCl<sub>3</sub>, 125 MHz)

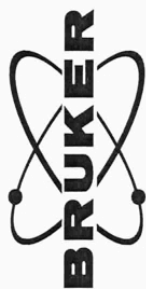

```

Current Data Parameters
NAME      JRR-IV-037B
EXPNO     13
PROCNO    1

F2 - Acquisition Parameters
Date_     20130805
Time      20.08
INSTRUM   spect
PROBHD    5 mm QNP 1H/13
PULPROG   zgdc
TD         181814
SOLVENT   CDCl3
NS         330
DS         0
SWH        30303.031 Hz
FIDRES     0.166671 Hz
AQ         2.9999809 sec
RG         13004
RW         16.500 usec
DE         7.50 usec
TE         294.6 K
D1         1.00000000 sec
d11        0.03000000 sec
TD0        1

===== CHANNEL f1 =====
NUC1       13C
P1         8.50 usec
PL1        0.00 dB
SFO1       125.7062372 MHz

===== CHANNEL f2 =====
CPDPRG2    waitz16
NUC2       1H
PCPD2      90.00 usec
PL2         1.00 dB
PL12       21.00 dB
SFO2       499.8734991 MHz

F2 - Processing parameters
SI          65536
SF          125.6924212 MHz
WDW         no
SSB         0
LB          0.00 Hz
GB          0
PC          1.40
    
```

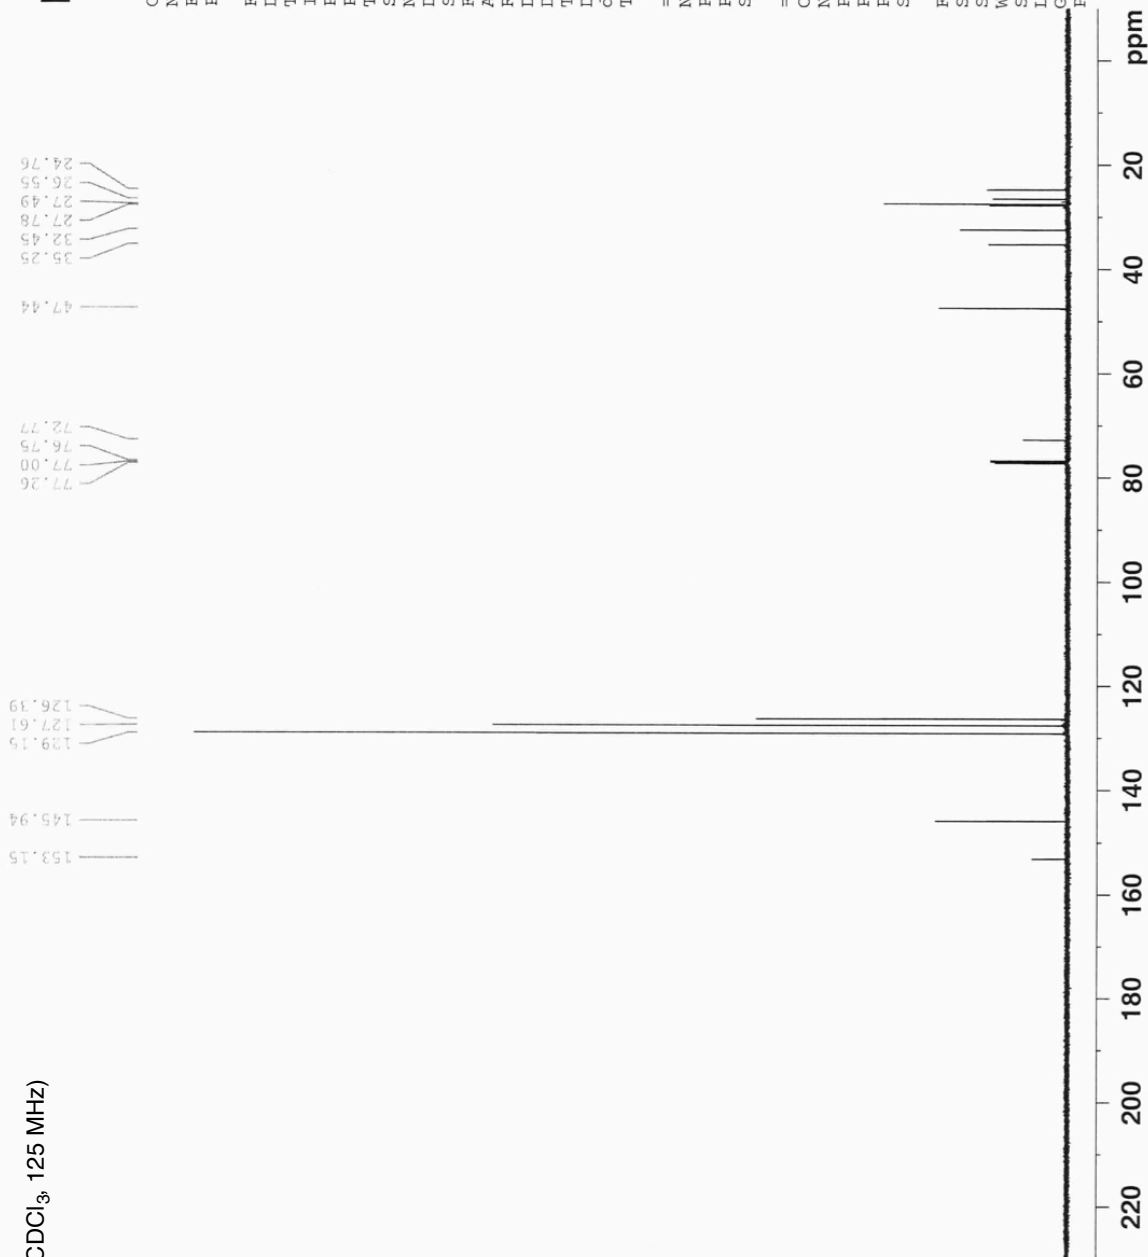

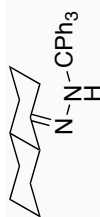

**11e** (CDCl<sub>3</sub>, 500 MHz)

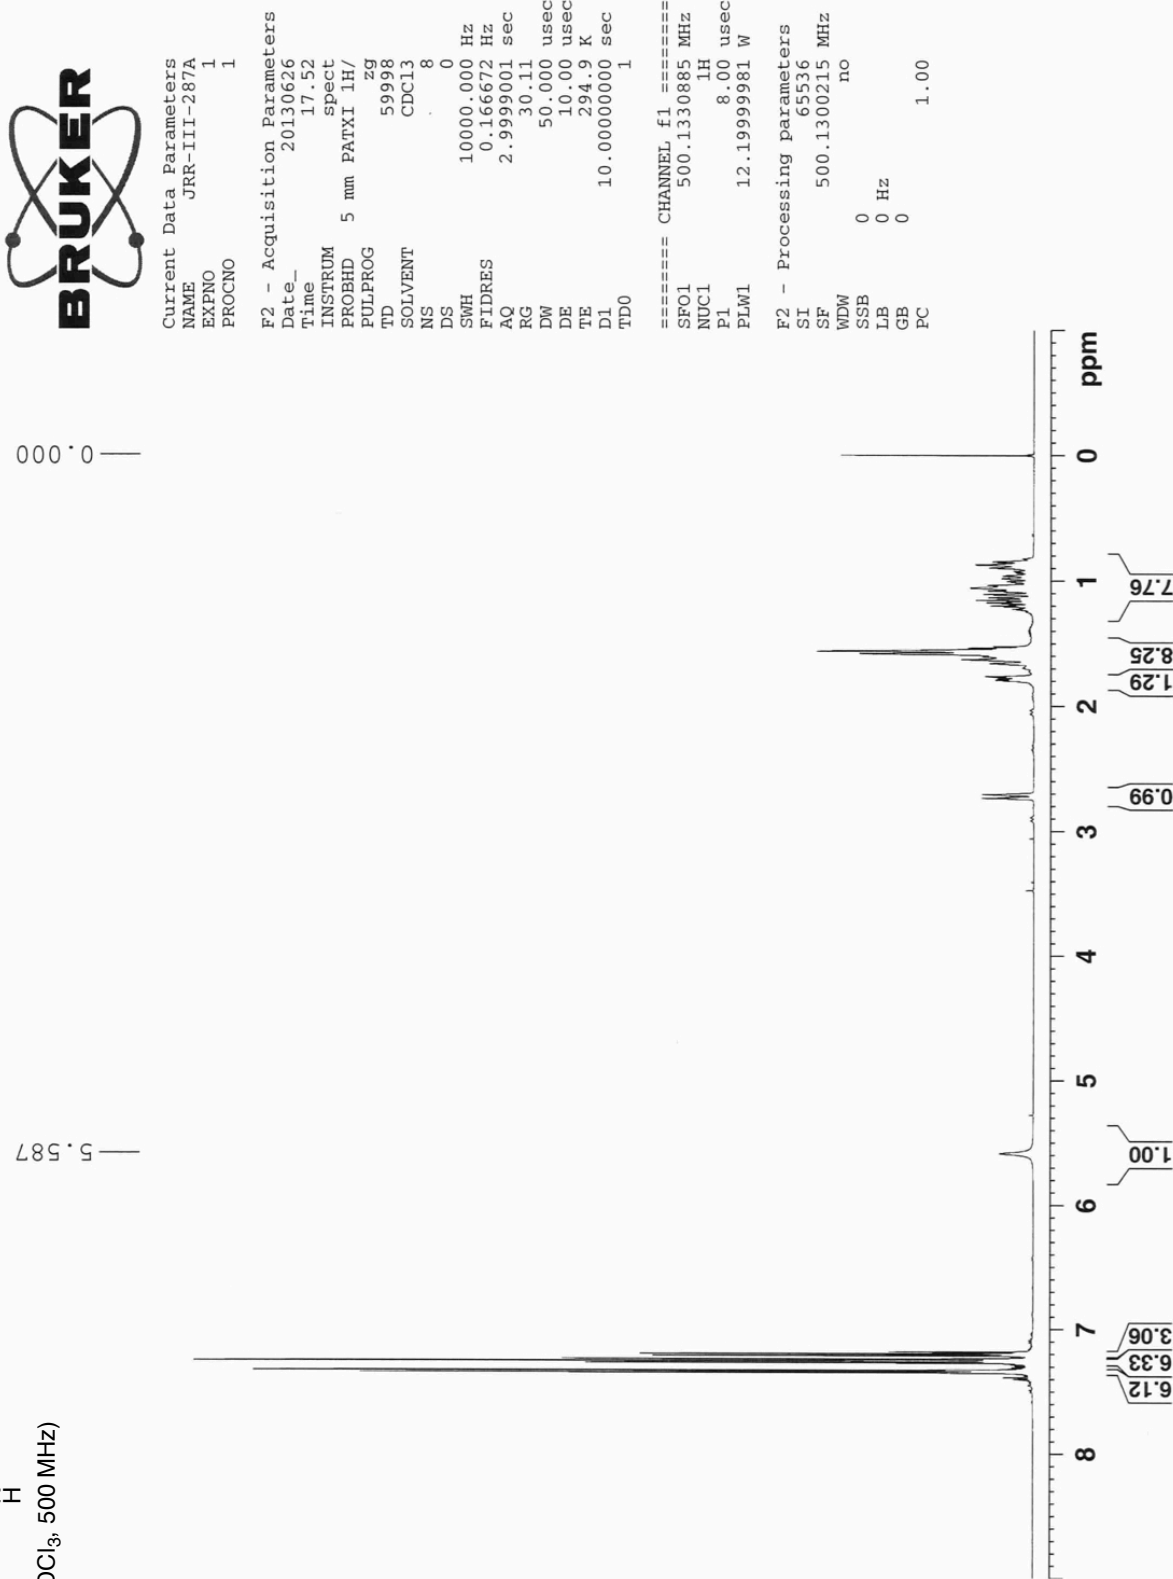

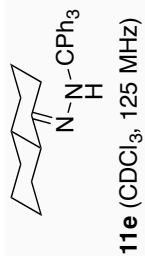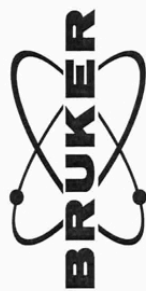

Current Data Parameters  
 NAME JRR-III-287A  
 EXPNO 13  
 PROCNO 1

F2 - Acquisition Parameters  
 Date\_ 20130626  
 Time 18.43  
 INSTRUM spect  
 PROBHD 5 mm QNP 1H/13  
 PULPROG zgdc  
 TD 181814  
 SOLVENT CDCl3  
 NS 637  
 DS 0  
 SWH 30303.031 Hz  
 FIDRES 0.166671 Hz  
 AQ 2.9999809 sec  
 RG 18390.4  
 DW 16.500 usec  
 DE 7.50 usec  
 TE 294.8 K  
 D1 1.0000000 sec  
 d11 0.0300000 sec  
 TDO 1

==== CHANNEL f1 =====  
 NUC1 13C  
 P1 8.50 usec  
 PL1 0.00 dB  
 SFO1 125.7062372 MHz

==== CHANNEL f2 =====  
 CPDPRG2 waltz16  
 NUC2 1H  
 FCPD2 90.00 usec  
 PL2 1.00 dB  
 PL12 21.00 dB  
 SFO2 499.8734991 MHz

F2 - Processing parameters  
 SI 65536  
 SF 125.6924198 MHz  
 WDW no  
 SSB 0  
 LB 0.00 Hz  
 GB 0  
 PC 1.40

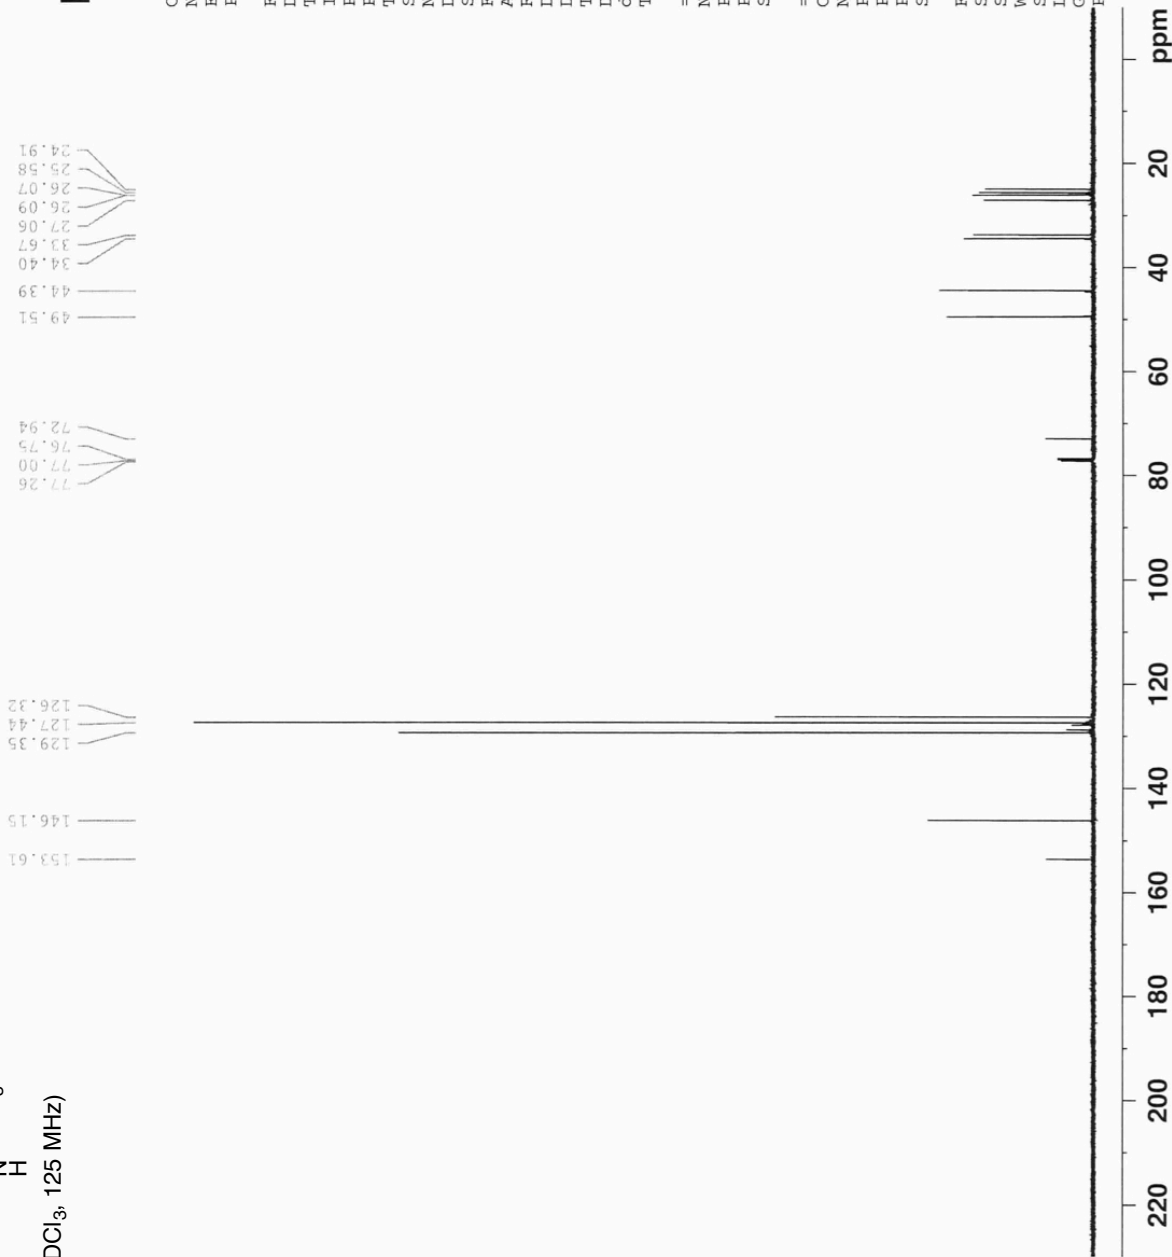





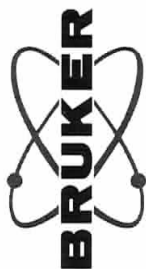

Current Data Parameters  
 NAME JRR-V-269A  
 EXPNO 1  
 PROCNO 1

F2 - Acquisition Parameters  
 Date\_ 20150319  
 Time 23.25  
 INSTRUM spect  
 PROBH 5 mm PATXI 1H/  
 PULPROG zg  
 TD 59998  
 SOLVENT CDCl3  
 NS 8  
 DS 0  
 SWH 10000.000 Hz  
 FIDRES 0.166672 Hz  
 AQ 2.9999001 sec  
 RG 196.79  
 DW 50.000 usec  
 DE 10.00 usec  
 TE 295.7 K  
 D1 7.00000000 sec  
 TD0 1

==== CHANNEL f1 =====  
 SFO1 500.1330885 MHz  
 NUC1 1H  
 P1 8.00 usec  
 PLW1 12.19999981 W

F2 - Processing parameters  
 SI 65536  
 SF 500.1300130 MHz  
 WDW no  
 SSB 0  
 LB 0 Hz  
 GB 0  
 PC 1.00

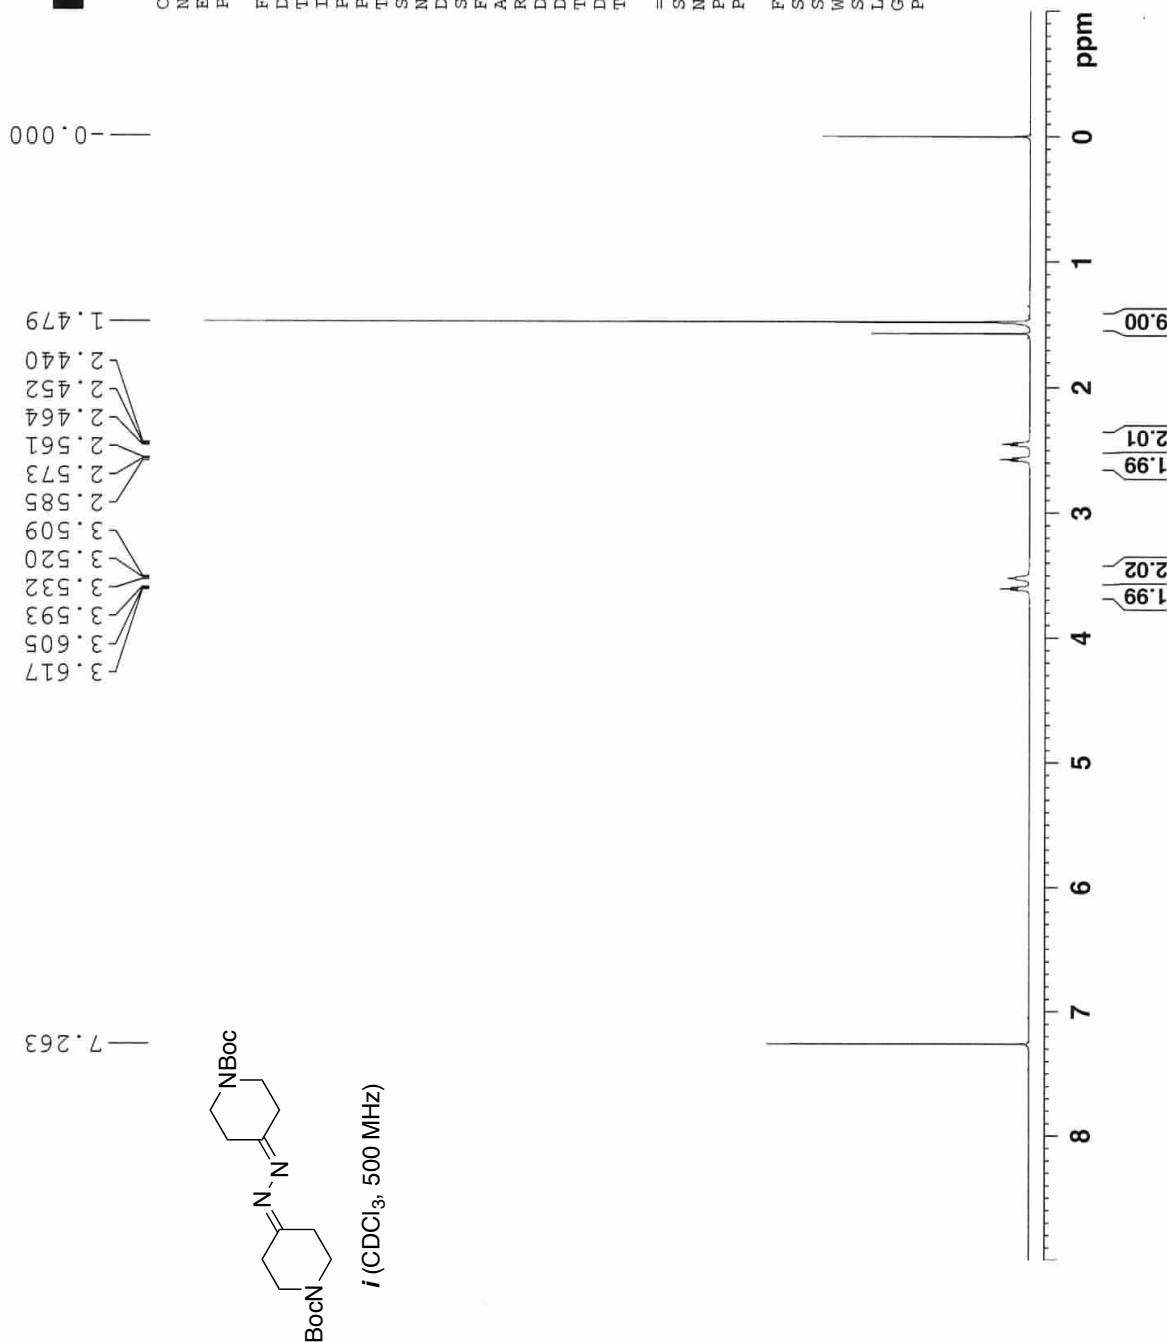

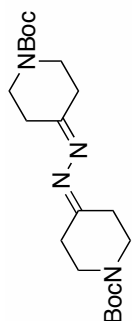

*i* (CDCl<sub>3</sub>, 125 MHz)

163.618  
154.614  
79.950  
77.255  
77.000  
76.746  
44.094  
42.528  
34.536  
28.395  
28.120

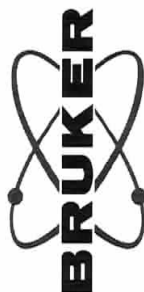

```

Current Data Parameters
NAME      JRR-V-268A
EXPNO     2
PROCNO    1

F2 - Acquisition Parameters
Date_     20140725
Time      18.13
INSTRUM   spect
PROBHD    5 mm PABBO BB/
PULPROG   zgdc
TD        227268
SOLVENT   CDCl3
NS        468
DS        0
SWH       37878.789 Hz
FIDRES    0.166670 Hz
AQ        2.9999375 sec
RG        2050
DW        13.200 usec
DE        6.50 usec
TE        297.6 K
D1        1.00000000 sec
D11       0.03000000 sec
TD0       1

===== CHANNEL f1 =====
SFO1     125.7049802 MHz
NUC1     13C
P1       10.00 usec
PLW1     72.83999634 W

===== CHANNEL f2 =====
SFO2     499.8724993 MHz
NUC2     1H
CPDPRG2  waltz16
PCPD2    80.00 usec
PLW2     19.00000000 W
PLWI2    0.29688001 W

F2 - Processing parameters
SI       1048576
SF       125.6924142 MHz
WDW      no
SSB      0
LB       0 Hz
GB       0
PC       1.40
    
```

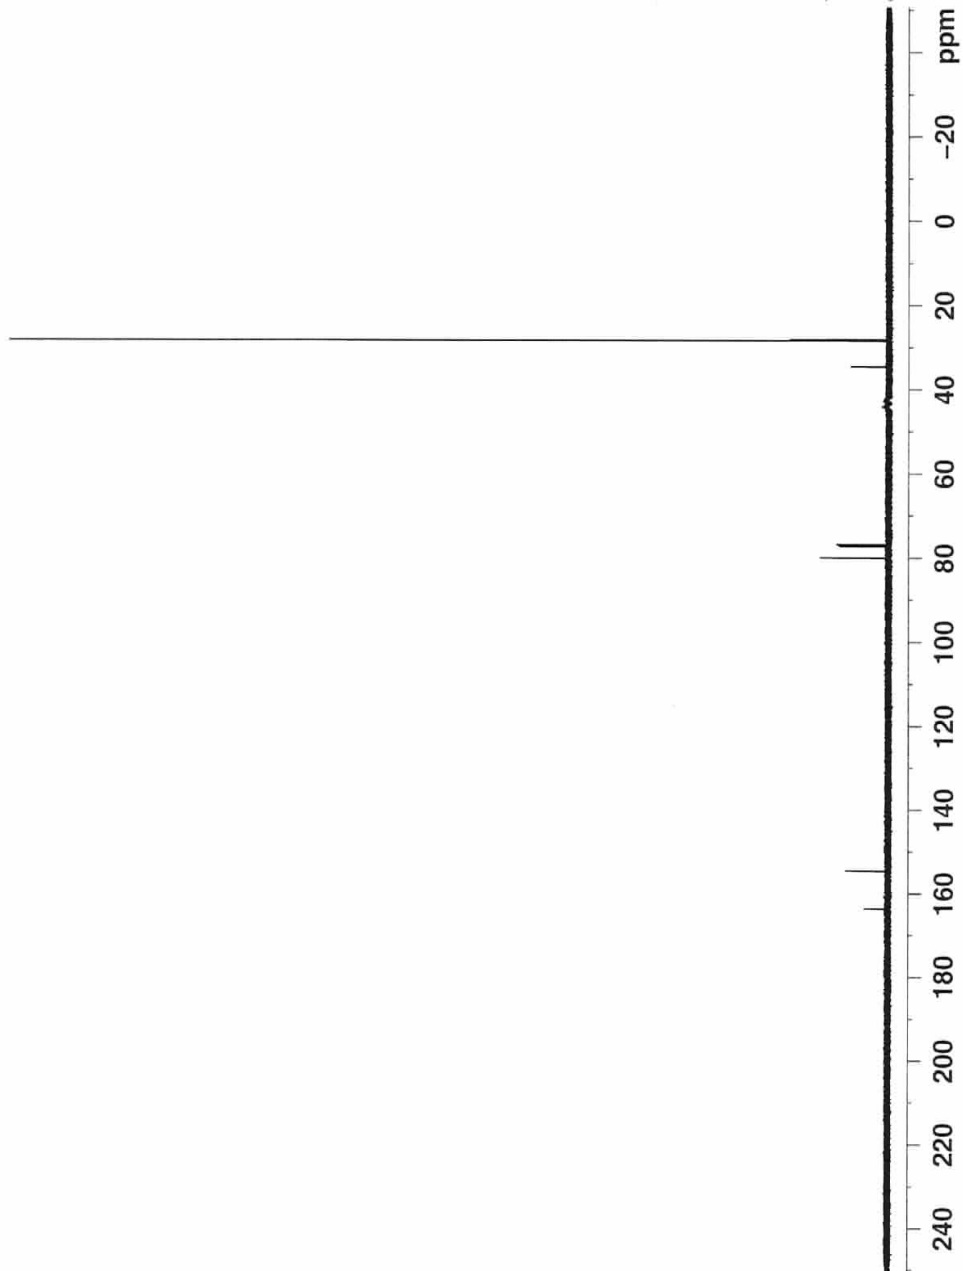

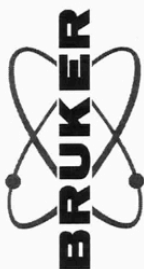

Current Data Parameters  
 NAME JRR-VII-110Bii  
 EXPNO 1  
 PROCNO 1

F2 - Acquisition Parameters  
 Date\_ 20150319  
 Time 10.08  
 INSTRUM spect  
 PROBHD 5 mm PATXI 1H/  
 PULPROG zg  
 TD 59998  
 SOLVENT CDCl3  
 NS 8  
 DS 0  
 SWH 10000.000 Hz  
 FIDRES 0.166672 Hz  
 AQ 2.9999001 sec  
 RG 64.36  
 DW 50.000 usec  
 DE 10.00 usec  
 TE 295.8 K  
 D1 10.00000000 sec  
 TD0 1

==== CHANNEL f1 =====  
 SF01 500.1330885 MHz  
 NUC1 1H  
 P1 8.00 usec  
 PLW1 12.19999981 W  
 F2 - Processing parameters  
 SI 65536  
 SF 500.1300086 MHz  
 WDW no  
 SSB 0  
 LB 0 Hz  
 GB 0  
 PC 1.00

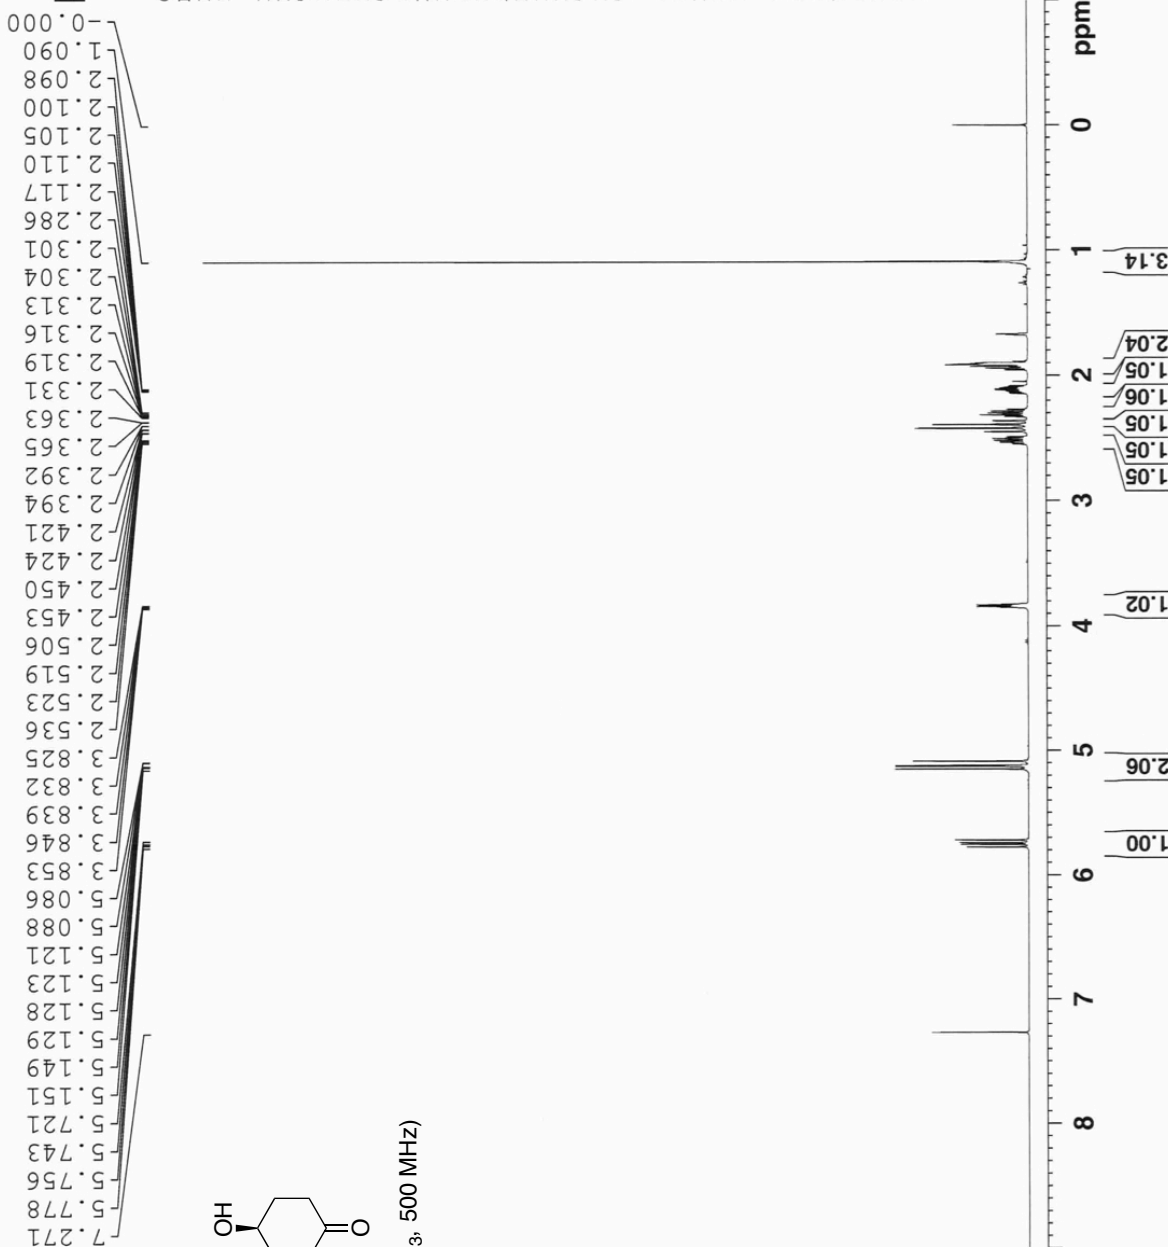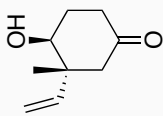

iii (CDCl<sub>3</sub>, 500 MHz)

```

Current Data Parameters
NAME      JRR-VII-119Bii
EXPNO     1
PROCNO    1

F2 - Acquisition Parameter
Date_     20150319
Time      11.17
INSTRUM   spect
PROBHD    5 mm PABBO BB/
PULPROG   zgdc
TD         227268
SOLVENT   CDCl3
NS         746
DS         0
SWH       37878.789 Hz
FIDRES    0.166670 Hz
AQ         2.9999375 se
RG         2050
DW         13.200 us
DE         6.50 us
TE         298.8 K
D1         1.0000000 se
D11        0.0300000 se
TD0        1

===== CHANNEL f1 =====
SFO1      125.7049802 MH
NUC1       13C
P1         10.00 us
PLW1       72.83999634 W

===== CHANNEL f2 =====
SFO2      499.8724993 MH
NUC2       1H
CPDPRG[2  waltz16
PCPD2      80.00 us
PLW2       19.0000000 W
PLW12      0.29688001 W

F2 - Processing parameters
SI         1048576
SF         125.6924125 MH
WDW        no
SSB        0
LB         0 Hz
GB         0
PC         1.40
    
```

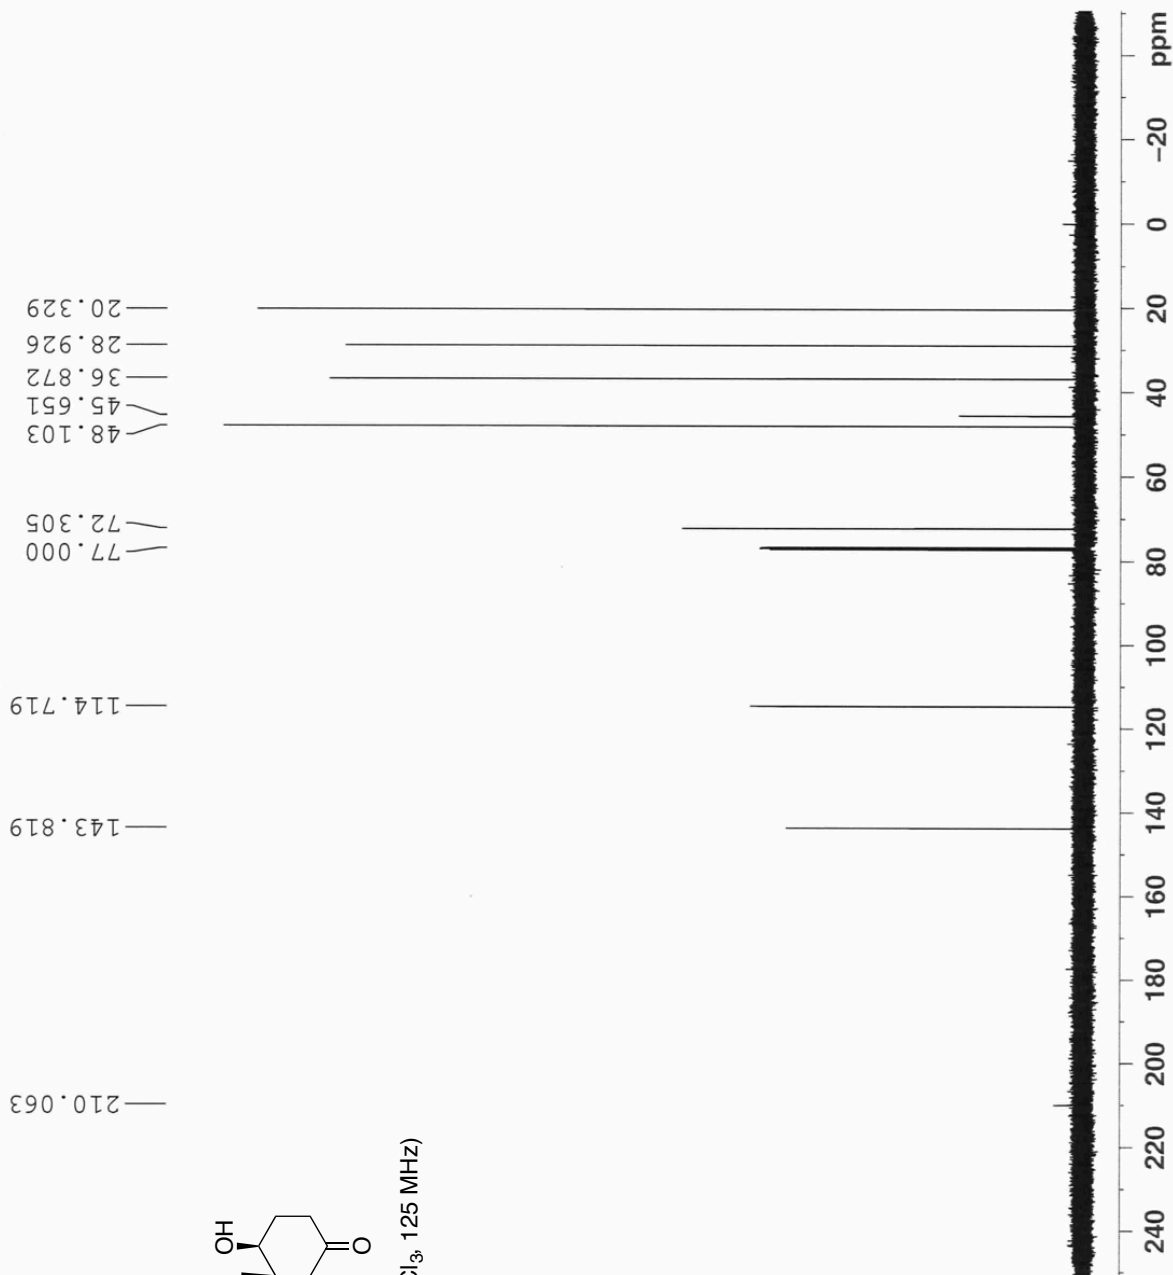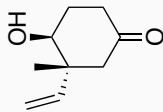

iii (CDCl<sub>3</sub>, 125 MHz)



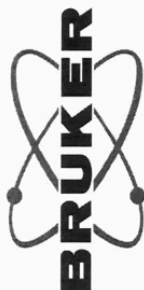

Current Data Parameters  
 NAME JRR-V-291A  
 EXPNO 2  
 PROCNO 1

F2 - Acquisition Parameters  
 Date\_ 20140902  
 Time 11.30  
 INSTRUM spect  
 PROBHD 5 mm FAPBO BB/  
 PULPROG zgdc  
 TD 227268  
 SOLVENT CDCl3  
 NS 806  
 DS 0  
 SWH 37878.789 Hz  
 FIDRES 0.166670 Hz  
 AQ 2.9999375 sec  
 RG 2050  
 DW 13.200 usec  
 DE 6.50 usec  
 TE 297.9 K  
 D1 1.00000000 sec  
 D11 0.03000000 sec  
 TD0 1

==== CHANNEL f1 =====  
 SFO1 125.7049802 MHz  
 NUC1 13C  
 P1 10.00 usec  
 PLW1 72.83999634 W

==== CHANNEL f2 =====  
 SFO2 499.8724993 MHz  
 NUC2 1H  
 CPDPRG12 waltz16  
 PCPD2 80.00 usec  
 PLW2 19.00000000 W  
 PLW12 0.29688001 W

F2 - Processing parameters  
 SI 1048576  
 SF 125.6924118 MHz  
 WDW no  
 SSB 0  
 LB 0 Hz  
 GB 0  
 PC 1.40

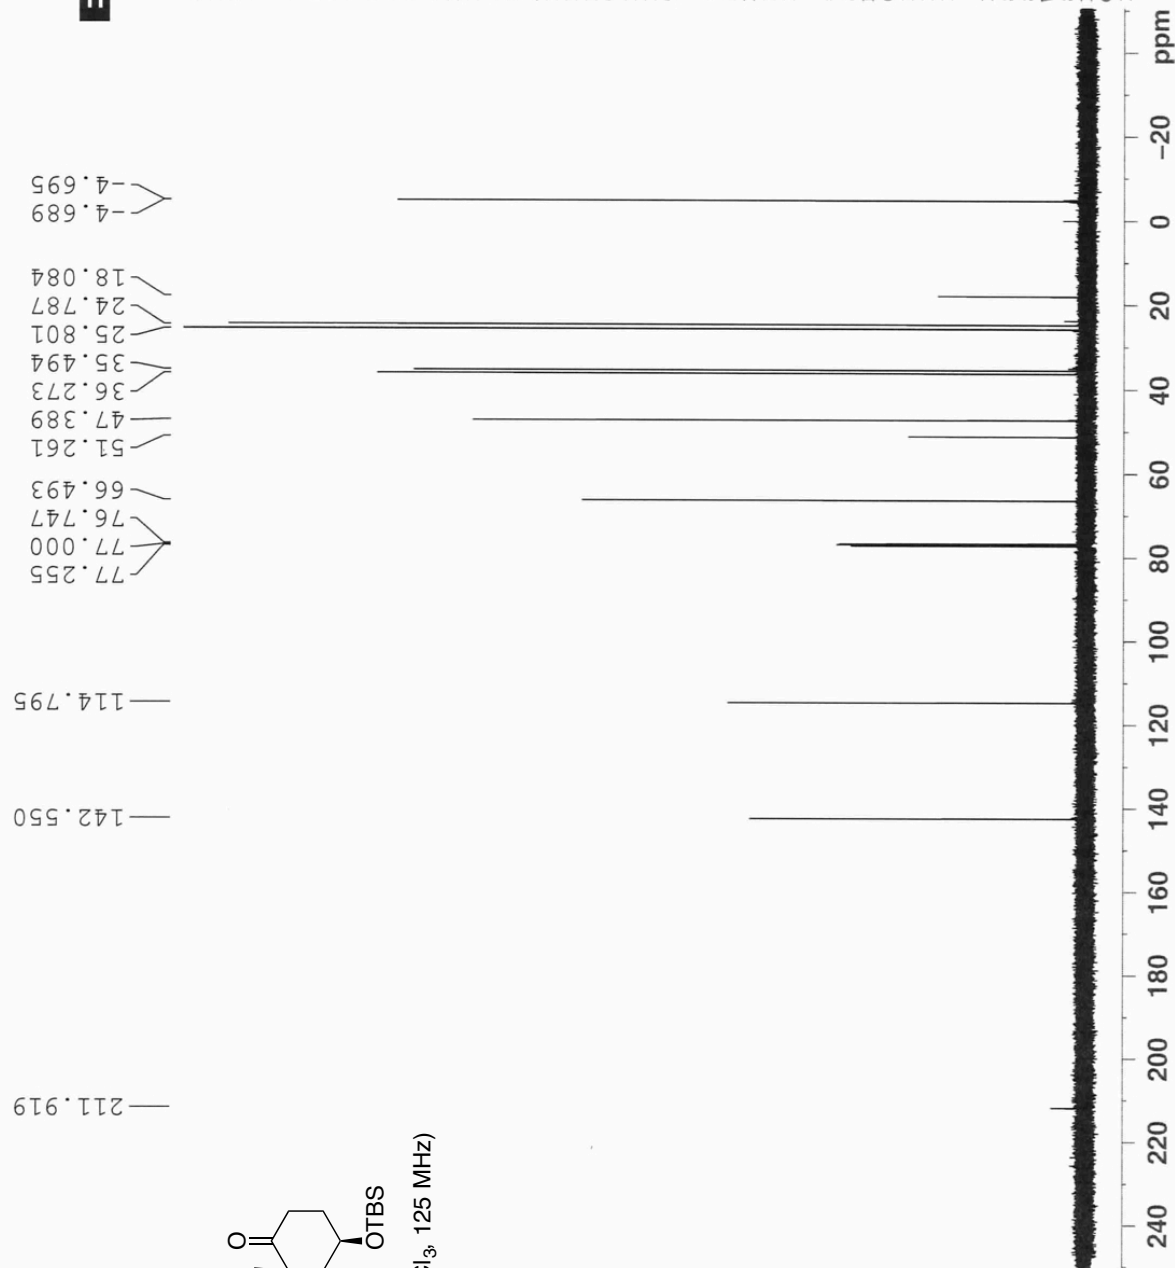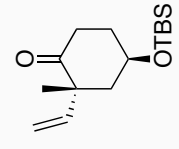

$^{13}\text{C}$  NMR (CDCl<sub>3</sub>, 125 MHz)

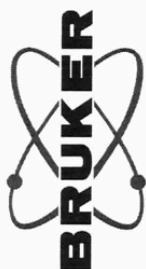

```

Current Data Parameters
NAME          JRR-V-291B
EXPNO         3
PROCNO        1

F2 - Acquisition Parameters
Date_         20140902
Time         18.28
INSTRUM       spect
PROBHD        5 mm PAXY-HT
PULPROG       noesygphd0
TD            2048
SOLVENT       CDCl3
NS            2
DS            16
SWH           3001.200 Hz
FIDRES       1.465430 Hz
AQ           0.3411968 sec
RG           179.04
DE           166.00 usec
TE           295.0 K
D0           0.00015581 sec
D1           4.69999981 sec
D8           2.38000011 sec
D11          0.03000000 sec
D12          0.00002000 sec
D16          0.00020000 sec
IN0          0.00033320 sec

===== CHANNEL f1 =====
SF01         500.1317505 MHz
NUC1         1H
P1           8.48 usec
F2           16.95 usec
P17         2500.00 usec
FLM1        12.19999981 W
FLM10       1.15499997 W

===== GRADIENT CHANNEL =====
GPRAM[1]    0 %
GPX1        0 %
GPZ1        0 %
P16         40.00 %
            1000.00 usec

F1 - Acquisition parameters
TD          128
SF01        500.1318 MHz
FIDRES     23.446878 Hz
SW         6.001 ppm
PRMODE     States-TPFI

F2 - Processing parameters
SI          1024
WDW         500.1300000 MHz
SSB         QSIINE
LB          0 Hz
GB          0
PC          1.00

F1 - Processing parameters
SI          1024
MC2         States-TPFI
SF          500.1300000 MHz
WDW         QSIINE
SSB         0 Hz
LB          0
GB          0
    
```

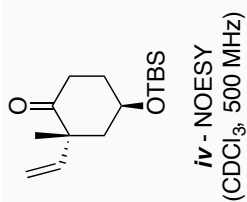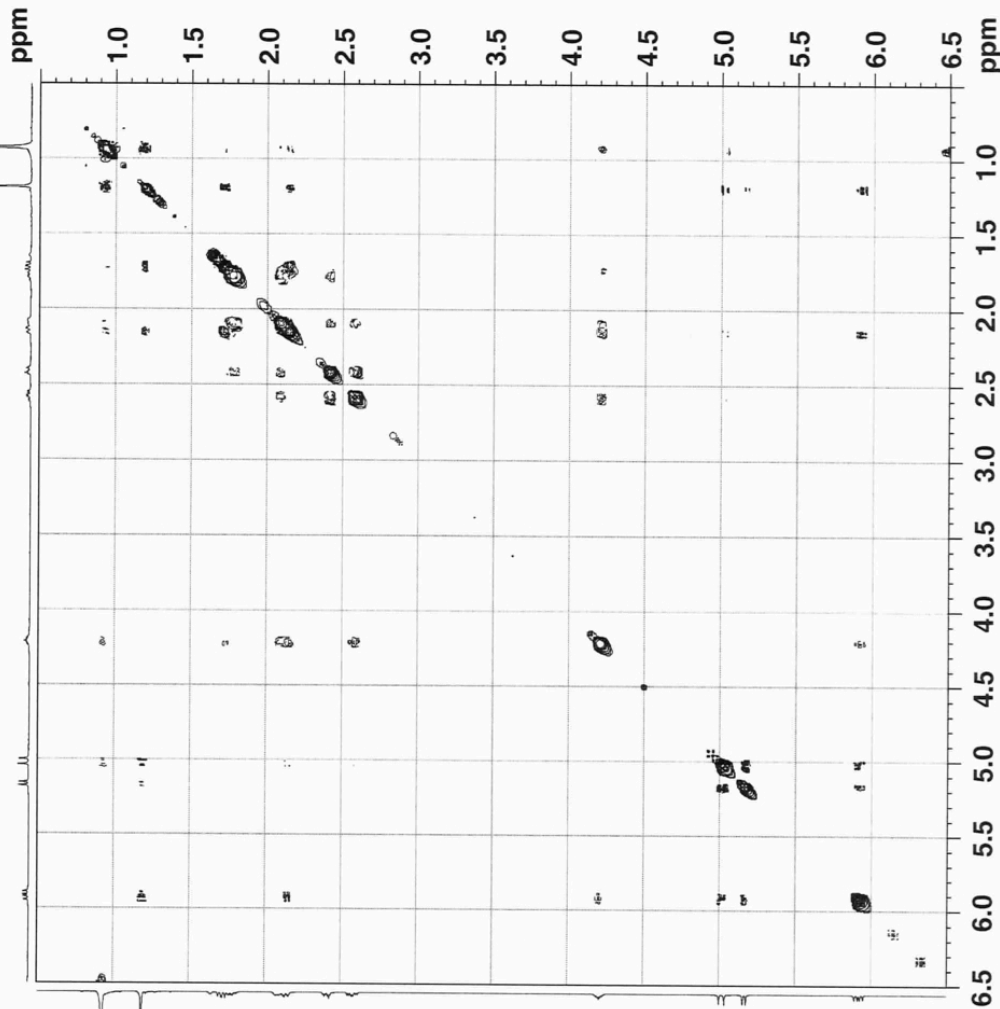

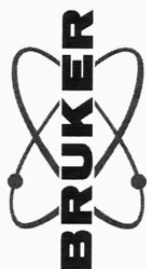

Current Data Parameters  
 NAME JRR-VI-009A  
 EXPNO 1  
 PROCNO 1

F2 - Acquisition Parameters  
 Date\_ 20141014  
 Time 20.51  
 INSTRUM spect  
 PROBHD 5 mm PATXI 1H/  
 PULPROG zg  
 TD 5998  
 SOLVENT CDCl3  
 NS 8  
 DS 0  
 SWH 10000.000 Hz  
 FIDRES 0.166672 Hz  
 AQ 2.9999001 sec  
 RG 97.37  
 DW 50.000 usec  
 DE 10.00 usec  
 TE 294.9 K  
 D1 10.00000000 sec  
 TD0 1

==== CHANNEL f1 =====  
 SFO1 500.1330885 MHz  
 NUC1 1H  
 P1 8.00 usec  
 PLW1 12.19999981 W

F2 - Processing parameters  
 SI 65536  
 SF 500.1300158 MHz  
 WDW no  
 SSB 0  
 LB 0 Hz  
 GB 0  
 PC 1.00

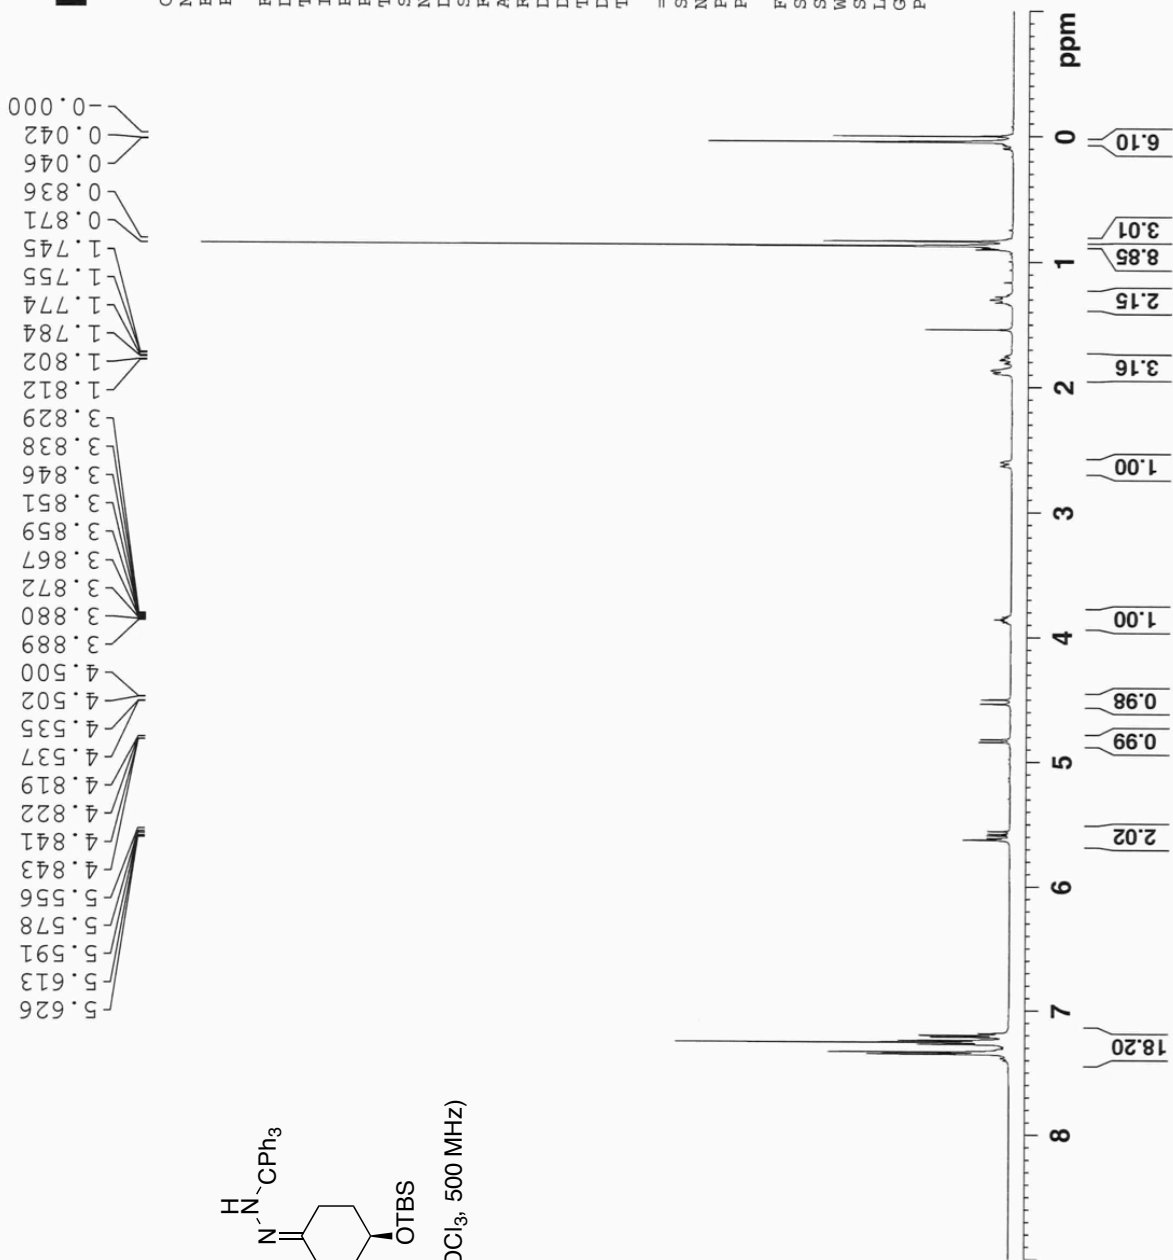



```

Current Data Parameters
NAME      JRR-VI-009A
EXPNO     2
PROCNO    1

F2 - Acquisition Parameter
Date_     20141015
Time      0.59
INSTRUM   spect
PROBHD    5 mm PABBO BB/
PULPROG   zgdc
TD         227268
SOLVENT   CDCl3
NS         3575
DS         0
SWH       37878.789 Hz
FIDRES    0.166670 Hz
AQ         2.9999375 se
RG         2050
DE         13.200 us
TE         6.50 us
TE         297.9 K
D1         1.00000000 se
D11        0.03000000 se
TDO        1

===== CHANNEL f1 =====
SFO1      125.7049802 MHz
NUC1      13C
P1         10.00 us
PLW1      72.83999634 W

===== CHANNEL f2 =====
SFO2      499.8724993 MHz
NUC2      1H
CPDPRG[2] waltz16
PCPD2     80.00 us
PLW2      19.00000000 W
PLW12     0.29688001 W

F2 - Processing parameters
SI         1048576
SF         125.6924116 MHz
WDW        no
SSB        0
LB         0 Hz
GB         0
PC         1.40
    
```

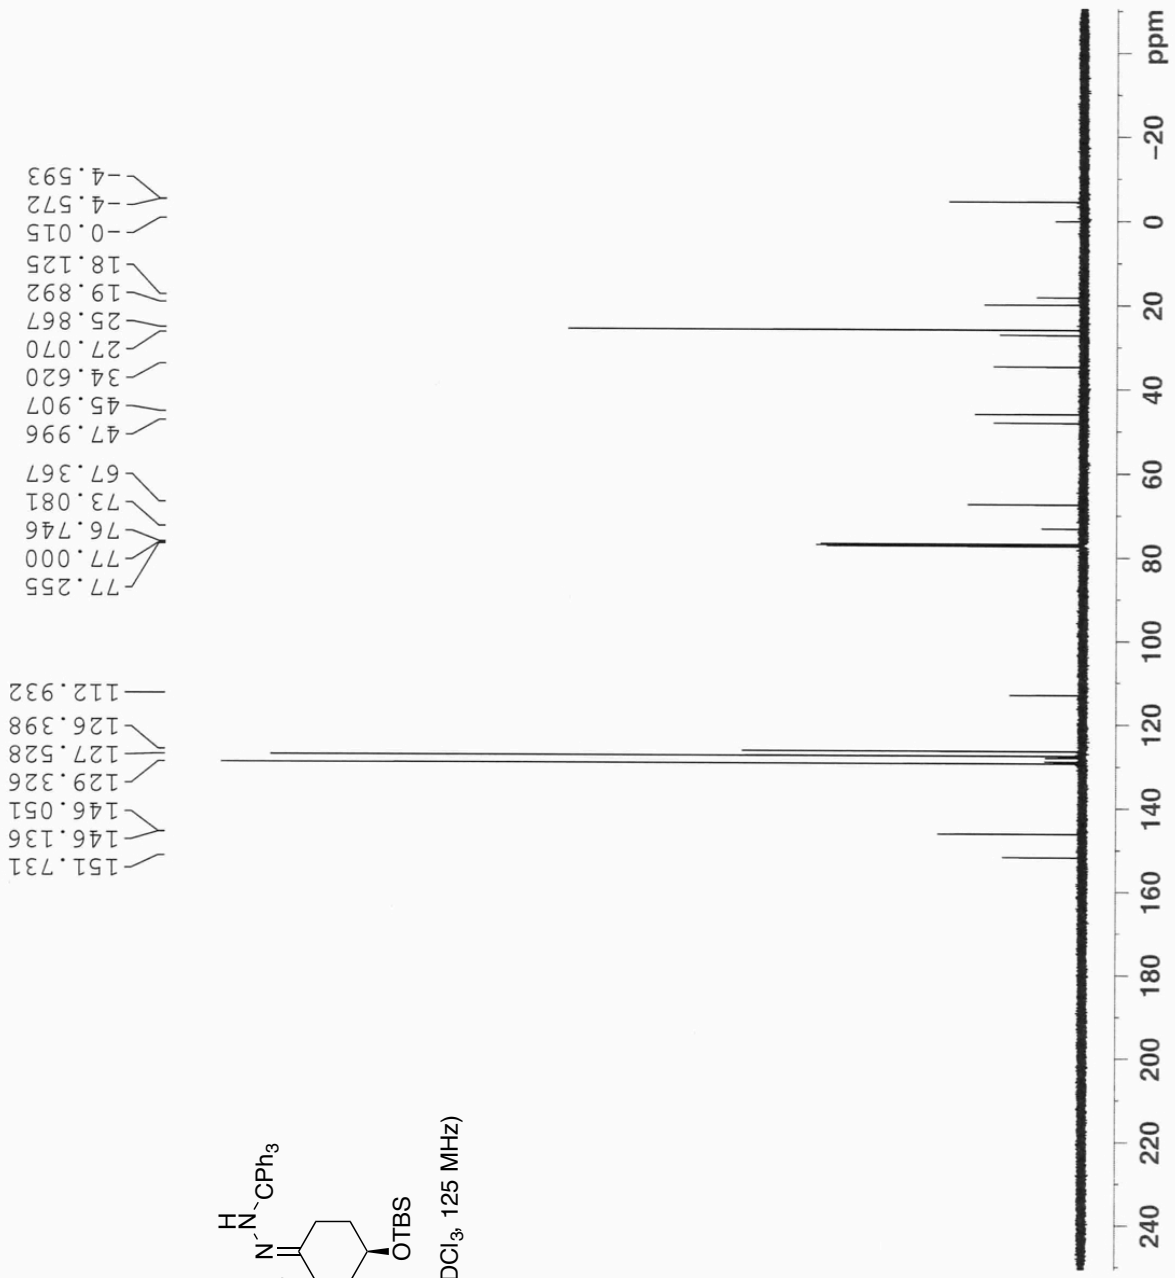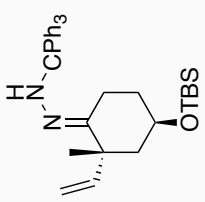

**11g** (CDCl<sub>3</sub>, 125 MHz)

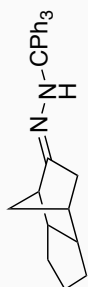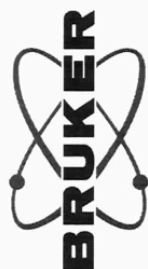

Current Data Parameters  
 NAME JRR-IV-058A  
 EXPNO 1  
 PROCNO 1

F2 - Acquisition Parameters  
 Date\_ 20130815  
 Time 17.35  
 INSTRUM spect  
 PROBHD 5 mm PATXI 1H/  
 PULPROG zg  
 TD 59998  
 SOLVENT  $\text{CDCl}_3$   
 NS 8  
 DS 0  
 SMH 10000.000 Hz  
 FIDRES 0.166672 Hz  
 AQ 2.9999001 sec  
 RG 196.79  
 DW 50.000 usec  
 DE 10.00 usec  
 TE 296.1 K  
 D1 10.00000000 sec  
 TD0 1

==== CHANNEL f1 =====  
 SFO1 500.1330885 MHz  
 NUC1 1H  
 P1 8.00 usec  
 PLW1 12.19999981 W

F2 - Processing parameters  
 SI 65536  
 SF 500.1300147 MHz  
 WDW no  
 SSB 0  
 LB 0 Hz  
 GB 0  
 PC 1.00

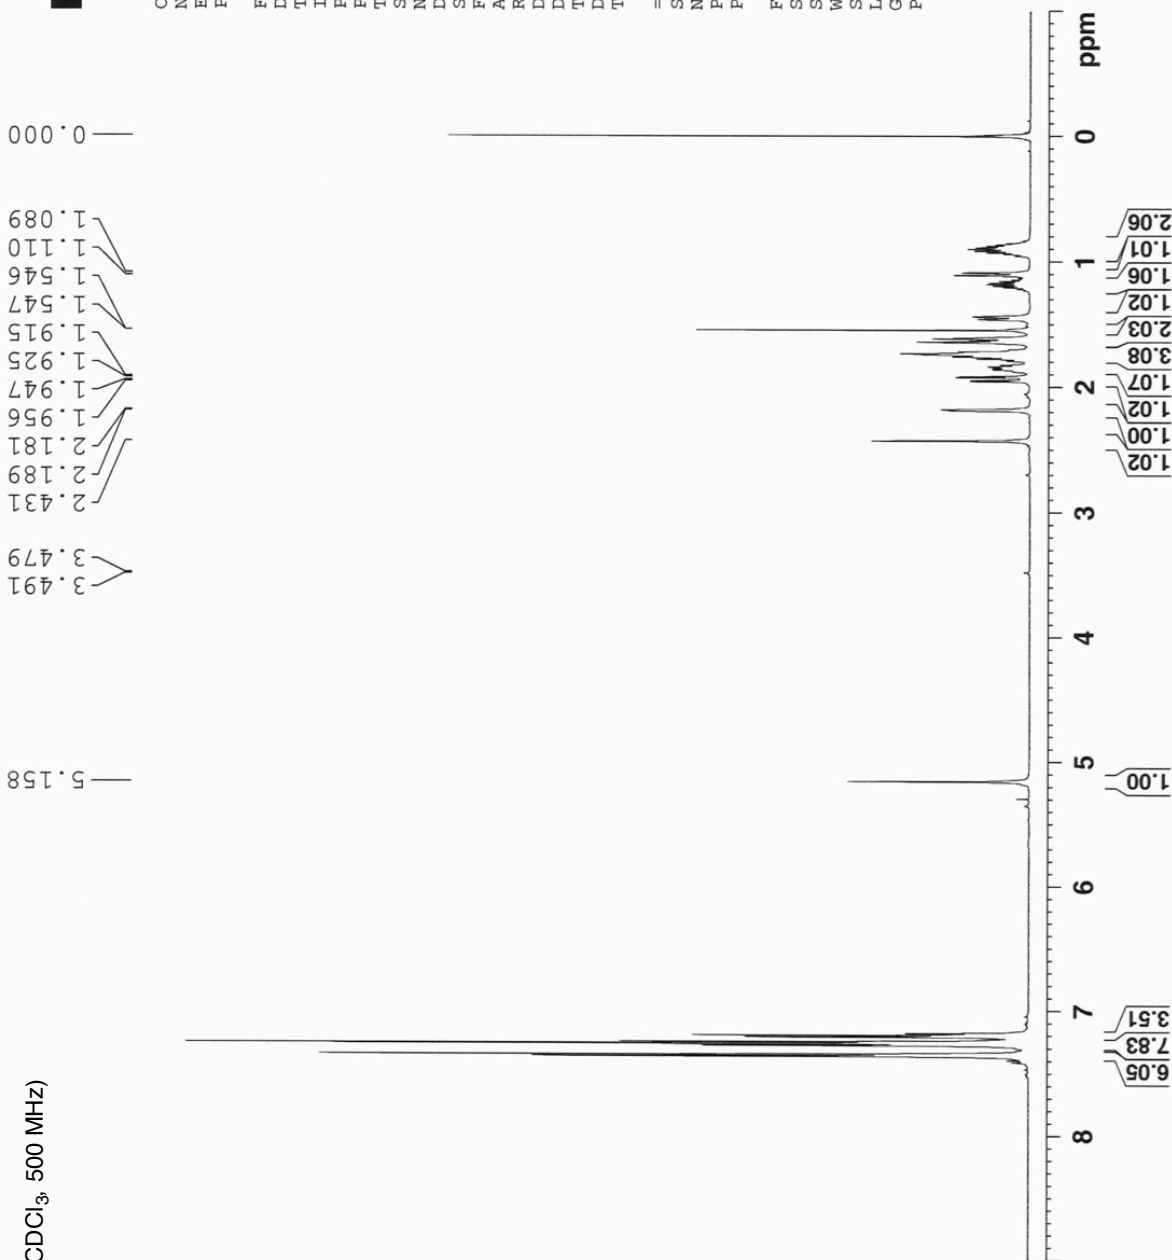

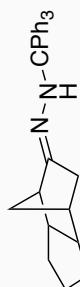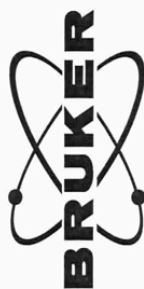

Current Data Parameters  
 NAME JRR-IV-005A  
 EXPNO 13  
 PROCNO 1

F2 - Acquisition Parameters  
 Date\_ 20130710  
 Time 20.30  
 INSTRUM spect  
 PROBHD 5 mm QNP 1H/13  
 PULPROG zgdc  
 TD 181814  
 SOLVENT CDCl3  
 NS 430  
 DS 0  
 SMH 30303.031 Hz  
 FIDRES 0.166671 Hz  
 AQ 2.9999809 sec  
 RG 13004  
 DW 16.500 usec  
 DE 7.50 usec  
 TE 300.0 K  
 D1 1.0000000 sec  
 d11 0.0300000 sec  
 TD0 1

==== CHANNEL f1 =====  
 NUC1 13C  
 P1 8.50 usec  
 PL1 0.00 dB  
 SFO1 125.7062372 MHz

==== CHANNEL f2 =====  
 CPDPRG2 waltz16  
 NUC2 1H  
 FCPD2 90.00 usec  
 PL2 1.00 dB  
 PL12 21.00 dB  
 SFO2 499.8734991 MHz

F2 - Processing parameters  
 SI 65536  
 SF 125.6924243 MHz  
 WDW no  
 SSB 0  
 LB 0.00 Hz  
 GB 0  
 PC 1.40

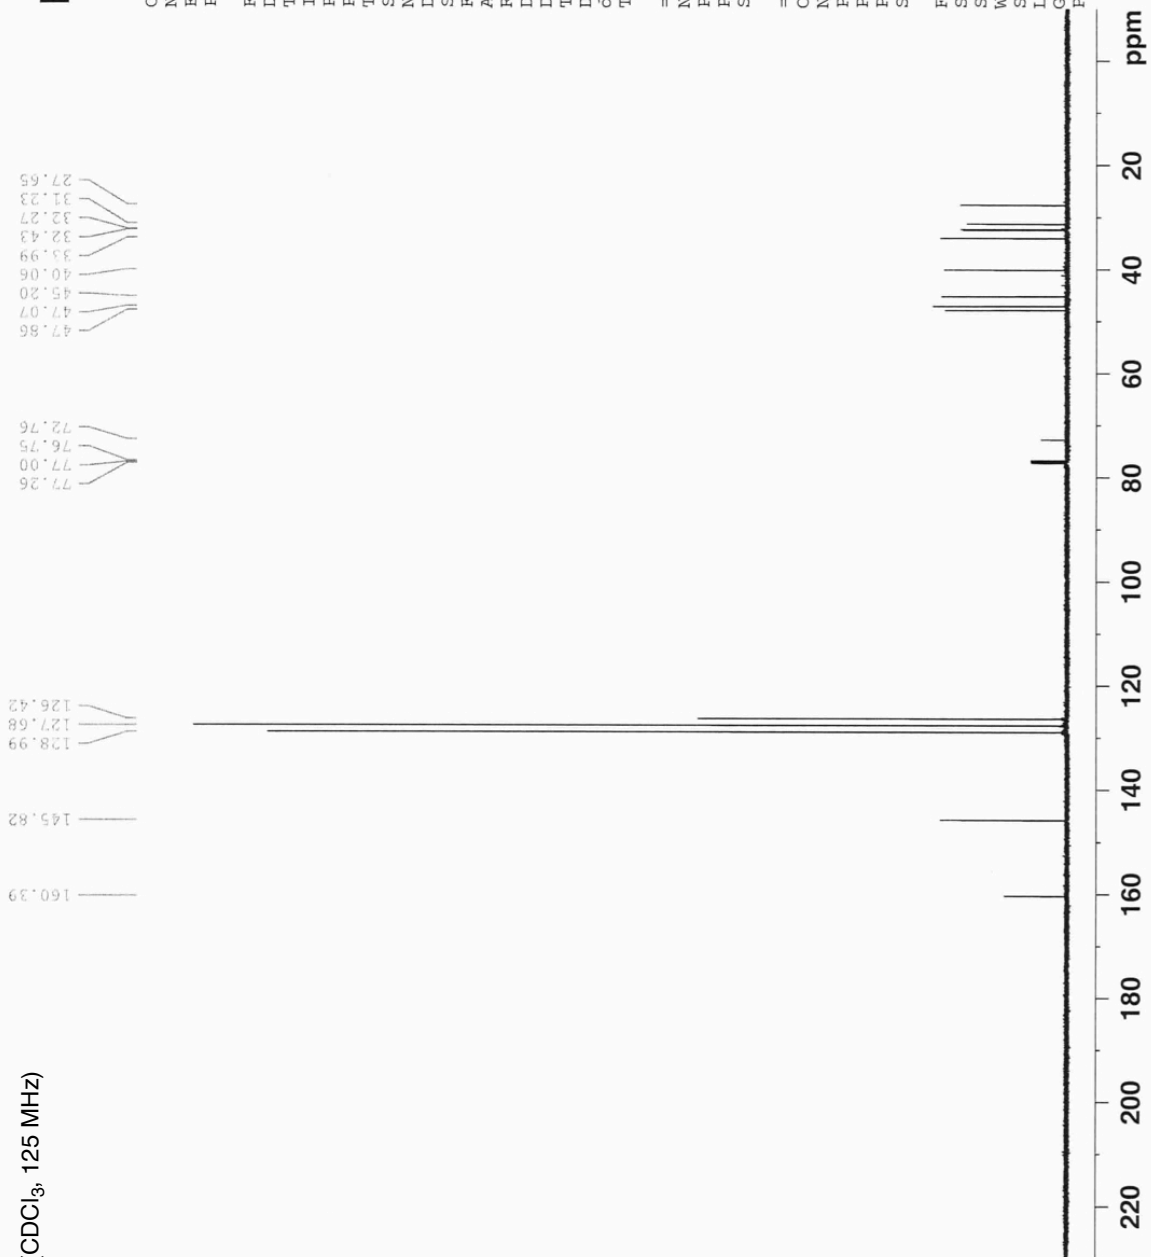

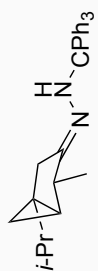

11i (CDCl<sub>3</sub>, 500MHz)

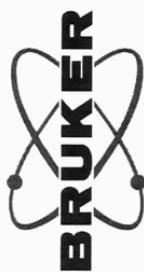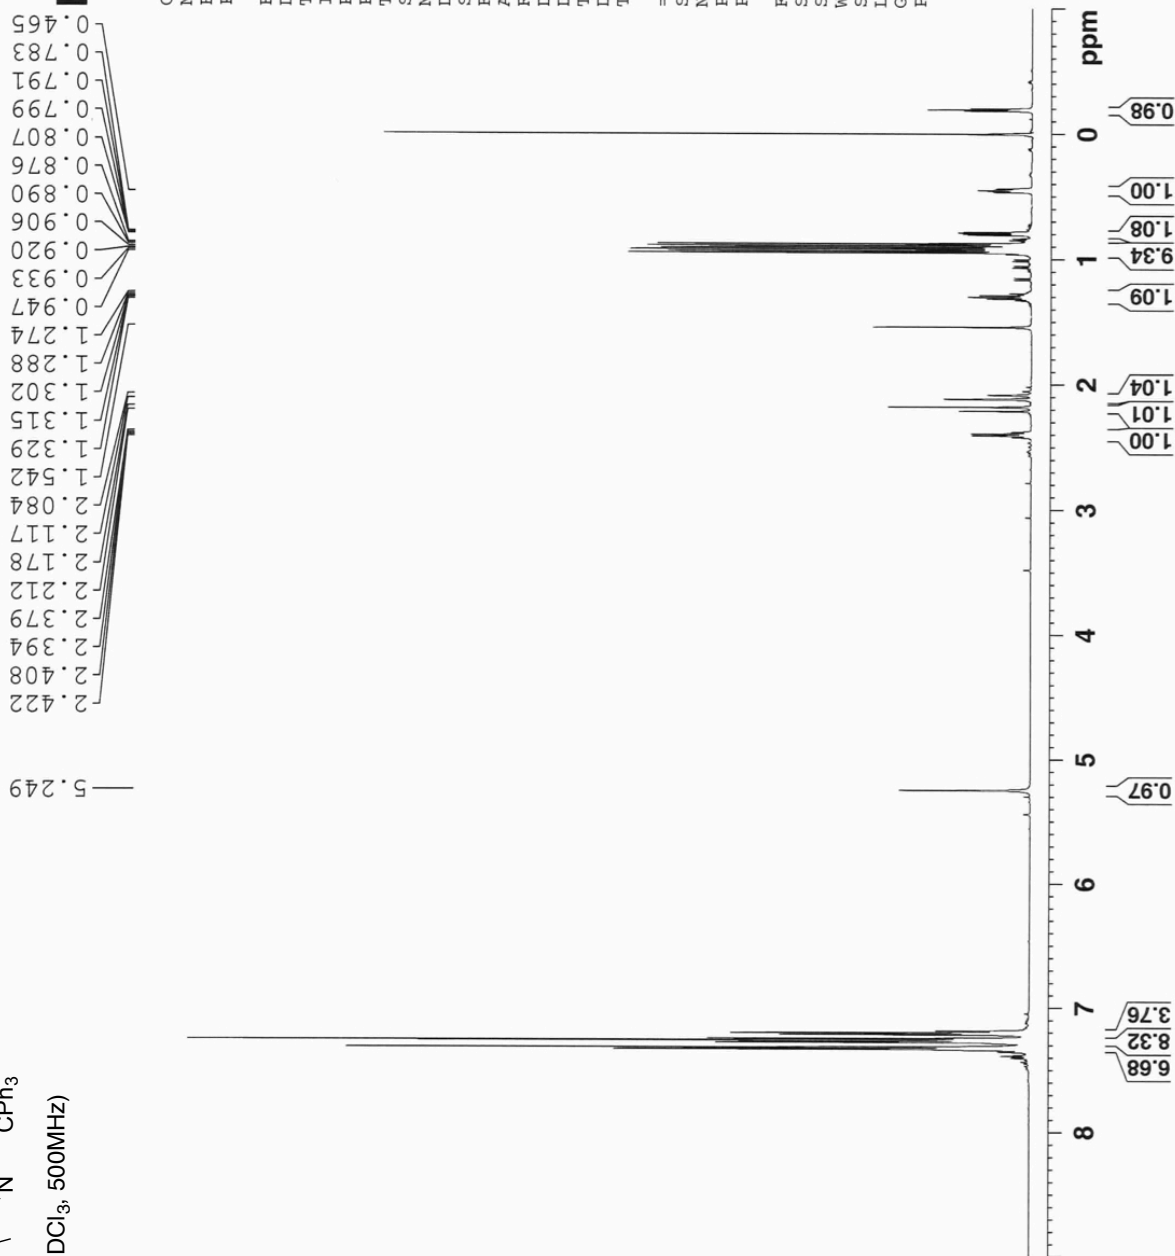

Current Data Parameters  
 NAME JRR-IV-045B  
 EXPNO 1  
 PROCNO 1

F2 - Acquisition Parameters  
 Date\_ 20140225  
 Time 20.56  
 INSTRUM spect  
 PROBD 5 mm PATXI 1H/  
 PULPROG zg  
 TD 59998  
 SOLVENT CDCl3  
 NS 8  
 DS 0  
 SWH 10000.000 Hz  
 FIDRES 0.166672 Hz  
 AQ 2.9999001 sec  
 RG 141.13  
 DW 50.000 usec  
 DE 10.00 usec  
 TE 295.5 K  
 D1 10.00000000 sec  
 TD0 1

==== CHANNEL f1 =====  
 SFO1 500.1330885 MHz  
 NUC1 1H  
 P1 8.00 usec  
 PLW1 12.19999981 W

F2 - Processing parameters  
 SI 65536  
 SF 500.1300141 MHz  
 WDW no  
 SSB 0  
 LB 0 Hz  
 GB 0  
 PC 1.00



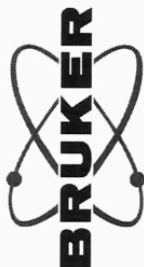

Current Data Parameters  
 NAME JER-IV-045B  
 EXPNO 4  
 PROCNO 1

F2 - Acquisition Parameters  
 Date\_ 20140225  
 Time 17:27  
 INSTRUM spect  
 PROBEHD 5 mm PATXI 1H/  
 PULPROG cosyzgpgqf  
 TD 2048  
 SOLVENT CDCl3  
 NS 1  
 SFO1 1798.561 Hz  
 FIDRES 0.878204 Hz  
 AQ 0.5693440 sec  
 RG 196.79  
 DW 278.000 usec  
 DE 10.00 usec  
 TE 295.5 K  
 D1 0.00000000 sec  
 D11 2.29999995 sec  
 D13 0.00000400 sec  
 D16 0.00020000 sec  
 INO 0.00055600 sec

===== CHANNEL f1 =====  
 SFO1 500.1306003 MHz  
 PFC1 8.50 usec  
 PLW1 12.19999981 W

===== GRADIENT CHANNEL =====  
 GPNAM[1] SMSQ10.100  
 GPNAM[2] SMSQ10.100  
 GPNAM[3] SMSQ10.100  
 GPX1 0 %  
 GPX2 0 %  
 GPX3 0 %  
 GPY1 0 %  
 GPY2 0 %  
 GPY3 0 %  
 GPZ1 16.00 %  
 GPZ2 5.00 %  
 GPZ3 40.00 %  
 E16 1000.00 usec

F1 - Acquisition parameters  
 TD 128  
 SFO1 500.1306 MHz  
 FIDRES 14.051259 Hz  
 SF 3.50 PPM  
 FMODE QF

F2 - Processing parameters  
 SI 1024  
 SF 500.1300000 MHz  
 WDW SINE  
 SSB 0 Hz  
 GB 0  
 FC 1.00

F1 - Processing parameters  
 SI 1024  
 MC2 OF  
 SF 500.1300000 MHz  
 WDW SINE  
 SSB 0 Hz  
 LB 0 Hz  
 GB 0

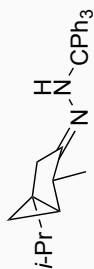

11i - COSY  
 (CDCl<sub>3</sub>, 500 MHz)

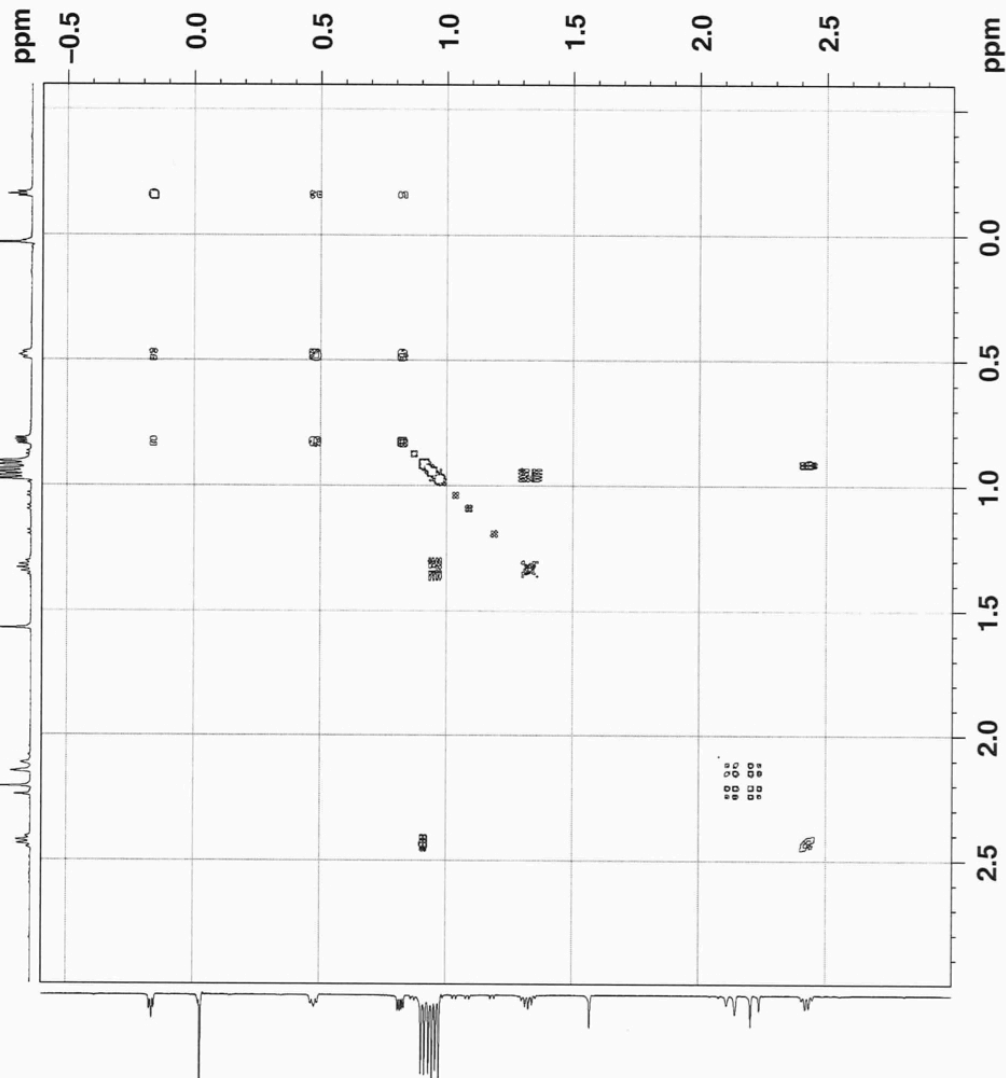

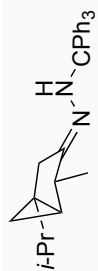

**11i** - NOESY  
(CDCl<sub>3</sub>, 500 MHz)

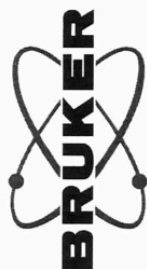

Current Data Parameters  
 NAME JRR-IV-045B  
 EXPNO 5  
 PROCNO 1

F2 - Acquisition Parameters  
 Date\_ 20140225  
 Time 21.44  
 INSTRUM spect  
 PROBHD 5 mm PAXXI 1H/  
 PULPROG noesygpppp  
 TD 64  
 SOLVENT CDCl3  
 NS 16  
 DS 1798.561 Hz  
 FIDRES 0.878204 Hz  
 AQ 0.5693440 sec  
 RG 196.79  
 DW 278.000 usec  
 DE 10.00 usec  
 TE 300.2 K  
 D0 0.0002714 sec  
 D1 2.2999995 sec  
 D8 1.1499998 sec  
 D11 0.0300000 sec  
 D12 0.0002000 sec  
 D16 0.0002000 sec  
 INO 0.0005560 sec

===== CHANNEL f1 =====  
 SF01 500.1306003 MHz  
 NU1 1  
 P1 8.50 usec  
 PL1 17.00 usec  
 PL17 2500.00 usec  
 PLM1 12.19999981 W  
 PLM10 1.15499997 W

===== GRADIENT CHANNEL =====  
 GPNAM[1] SMSQ10.100  
 GP11 0 %  
 GP21 0 %  
 PL6 40.00 %  
 P16 1000.00 usec

F1 - Acquisition parameters  
 TD 256  
 SF01 500.1306 MHz  
 FIDRES 7.025630 Hz  
 SW 3.596 ppm  
 FMODE States-TFPI

F2 - Processing parameters  
 SI 1024  
 SF 500.1300000 MHz  
 QF 0.0000000  
 WDW 500.1300000 MHz  
 LB 0 Hz  
 GB 0  
 FC 1.00

F1 - Processing parameters  
 SI 1024  
 SF 500.1300001 MHz  
 WDW 500.1300001 MHz  
 SSB 0  
 LB 0 Hz  
 GB 0

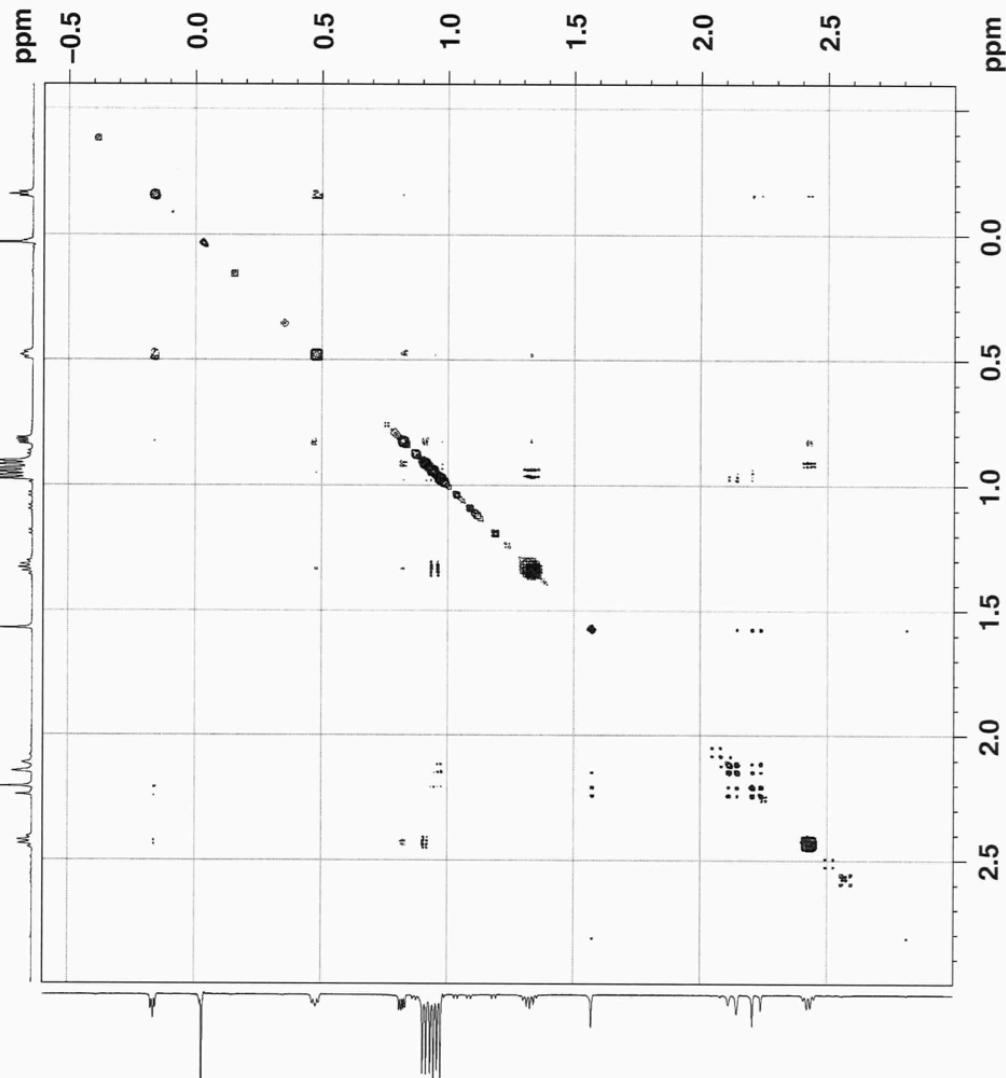

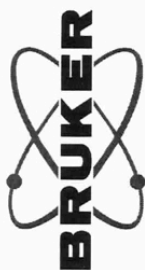

Current Data Parameters  
 NAME JRR-III-299F  
 EXPNO 1  
 PROCNO 1

F2 - Acquisition Parameters  
 Date\_ 20130721  
 Time 13.44  
 INSTRUM spect  
 PROBHD 5 mm QNP 1H/13  
 PULPROG zg  
 TD 59998  
 SOLVENT CDC13  
 NS 8  
 DS 0  
 SWH 10000.000 Hz  
 FIDRES 0.166672 Hz  
 AQ 2.9999001 sec  
 RG 181  
 DW 50.000 usec  
 DE 7.50 usec  
 TE 294.0 K  
 D1 3.00000000 sec  
 TDO 1

==== CHANNEL f1 =====  
 NUC1 1H  
 PL 10.00 usec  
 PL1 0 dB  
 SFO1 499.8740056 MHz

F2 - Processing parameters  
 SI 32768  
 SF 499.8700229 MHz  
 WDW no  
 SSB 0  
 LB 0 Hz  
 GB 0  
 PC 1.00

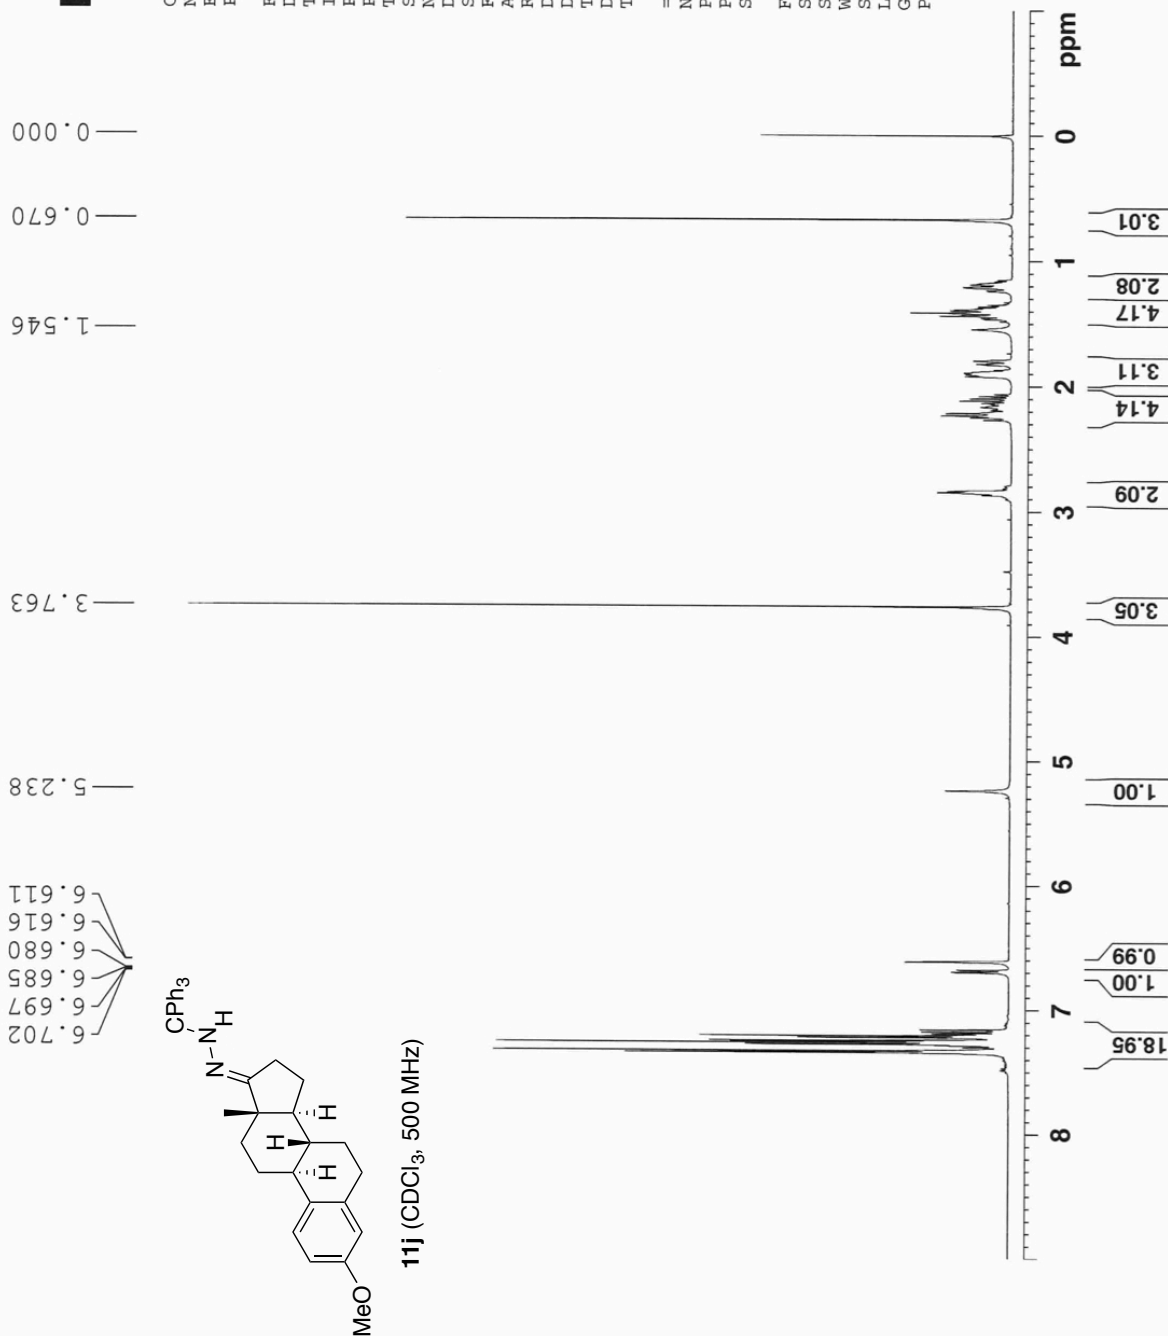



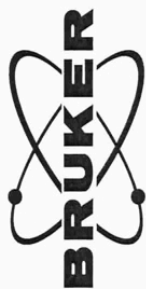

JRR-III-299F  
 NAME  
 EXPNO 13  
 PROCNO 1  
 Date\_ 20130722  
 Time 0.55  
 INSTRUM spect  
 PROBHD 5 mm QNP 1H/13  
 PULPROG zgdc  
 TD 181814  
 SOLVENT CDC13  
 NS 9869  
 DS 0  
 SWH 30303.031 Hz  
 FIDRES 0.166671 Hz  
 AQ 2.9999809 sec  
 RG 16384  
 DW 16.500 usec  
 DE 7.50 usec  
 TE 300.0 K  
 D1 1.00000000 sec  
 d11 0.03000000 sec  
 TDO 1  
 ===== CHANNEL f1 =====  
 NUC1 13C  
 P1 8.50 usec  
 PL1 0.00 dB  
 SFO1 125.7062372 MHz  
 ===== CHANNEL f2 =====  
 CPDPRG2 waltz16  
 NUC2 1H  
 PCPD2 90.00 usec  
 PL2 1.00 dB  
 PL12 21.00 dB  
 SFO2 499.8734991 MHz  
 SI 65536  
 SF 125.6924186 MHz  
 WDW no  
 SSB 0  
 LB 0.00 Hz  
 GB 0  
 PC 1.40

17.01  
 23.31  
 24.90  
 26.20  
 27.21  
 29.75  
 34.26  
 38.17  
 44.23  
 44.40  
 52.58  
 55.17  
 72.89  
 76.74  
 76.99  
 77.25  
 111.39  
 113.74  
 126.31  
 126.39  
 127.48  
 129.28  
 132.71  
 137.81  
 146.11  
 157.38  
 162.47

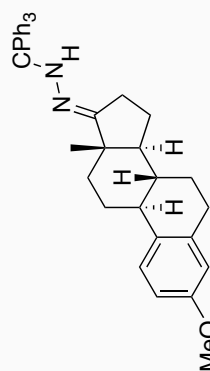

11j (CDCl<sub>3</sub>, 125 MHz)

ppm

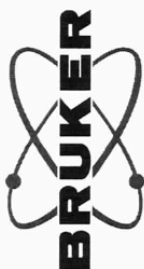

Current Data Parameters  
 NAME JRR-III-253B  
 EXPNO 1  
 PROCNO 1

F2 - Acquisition Parameters  
 Date\_ 20130612  
 Time 12.25  
 INSTRUM spect  
 PROBHD 5 mm PATXI 1H/  
 PULPROG zg  
 TD 59998  
 SOLVENT CDCl3  
 NS 8  
 DS 0  
 SWH 10000.000 Hz  
 FIDRES 0.166672 Hz  
 AQ 2.9999001 sec  
 RG 6.92  
 DW 50.000 usec  
 DE 10.00 usec  
 TE 294.5 K  
 D1 10.0000000 sec  
 TD0 1

==== CHANNEL f1 =====  
 SFO1 500.1330885 MHz  
 NUC1 1H  
 P1 8.00 usec  
 PLW1 12.19999981 W

F2 - Processing parameters  
 SI 65536  
 SF 500.1300153 MHz  
 WDW no  
 SSB 0 Hz  
 LB 0 Hz  
 GB 0  
 PC 1.00

-0.001

3.884  
 3.875  
 3.865  
 3.861  
 3.852  
 3.842  
 3.837  
 3.828  
 3.819

7.257

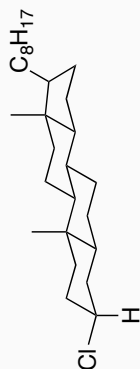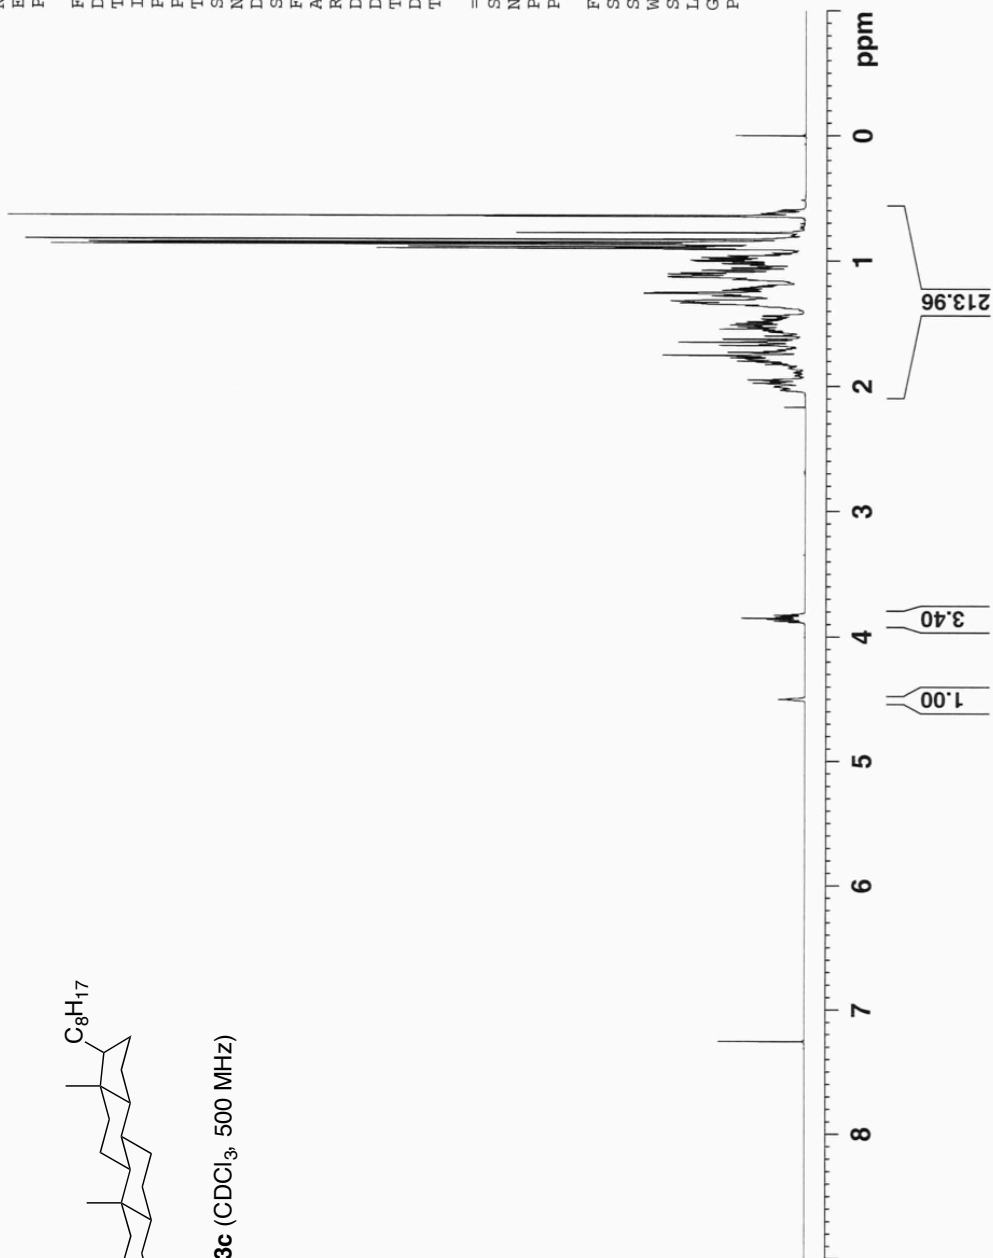

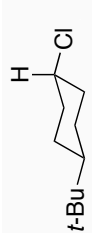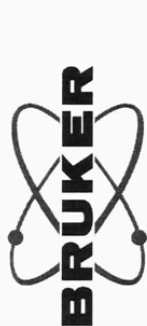

Current Data Parameters  
 NAME JRR-IV-041B  
 EXPNO 1  
 PROCNO 1

F2 - Acquisition Parameters  
 Date\_ 20130807  
 Time 12.21  
 INSTRUM spect  
 PROBHD 5 mm PATXI 1H/  
 PULPROG zg  
 TD 59998  
 SOLVENT CDCl3  
 NS 8  
 DS 0  
 SWH 10000.000 Hz  
 FIDRES 0.166672 Hz  
 AQ 2.9999001 sec  
 RG 14.3  
 DW 50.000 usec  
 DE 10.00 usec  
 TE 298.2 K  
 D1 10.00000000 sec  
 TD0 1

==== CHANNEL f1 =====  
 SF01 500.1330885 MHz  
 NUC1 1H  
 P1 8.00 usec  
 PLW1 12.19999981 W  
 F2 - Processing parameters  
 SI 65536  
 SF 500.1300129 MHz  
 WDW no  
 SSB 0  
 LB 0 Hz  
 GB 0  
 PC 1.00

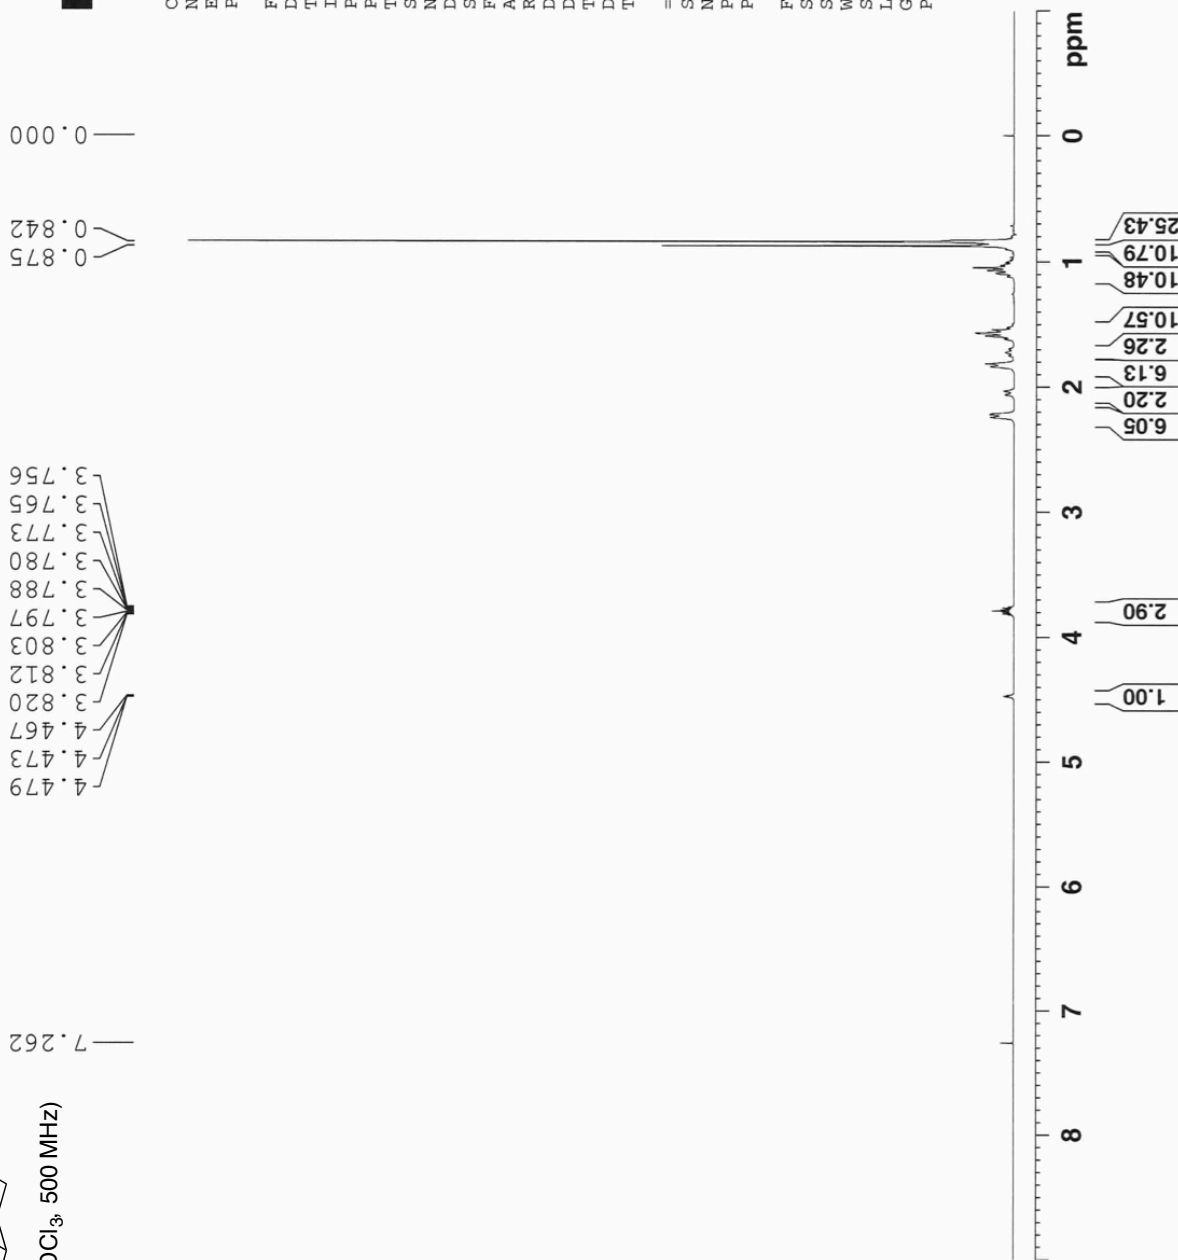

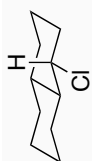

13e (CDCl<sub>3</sub>, 500 MHz)

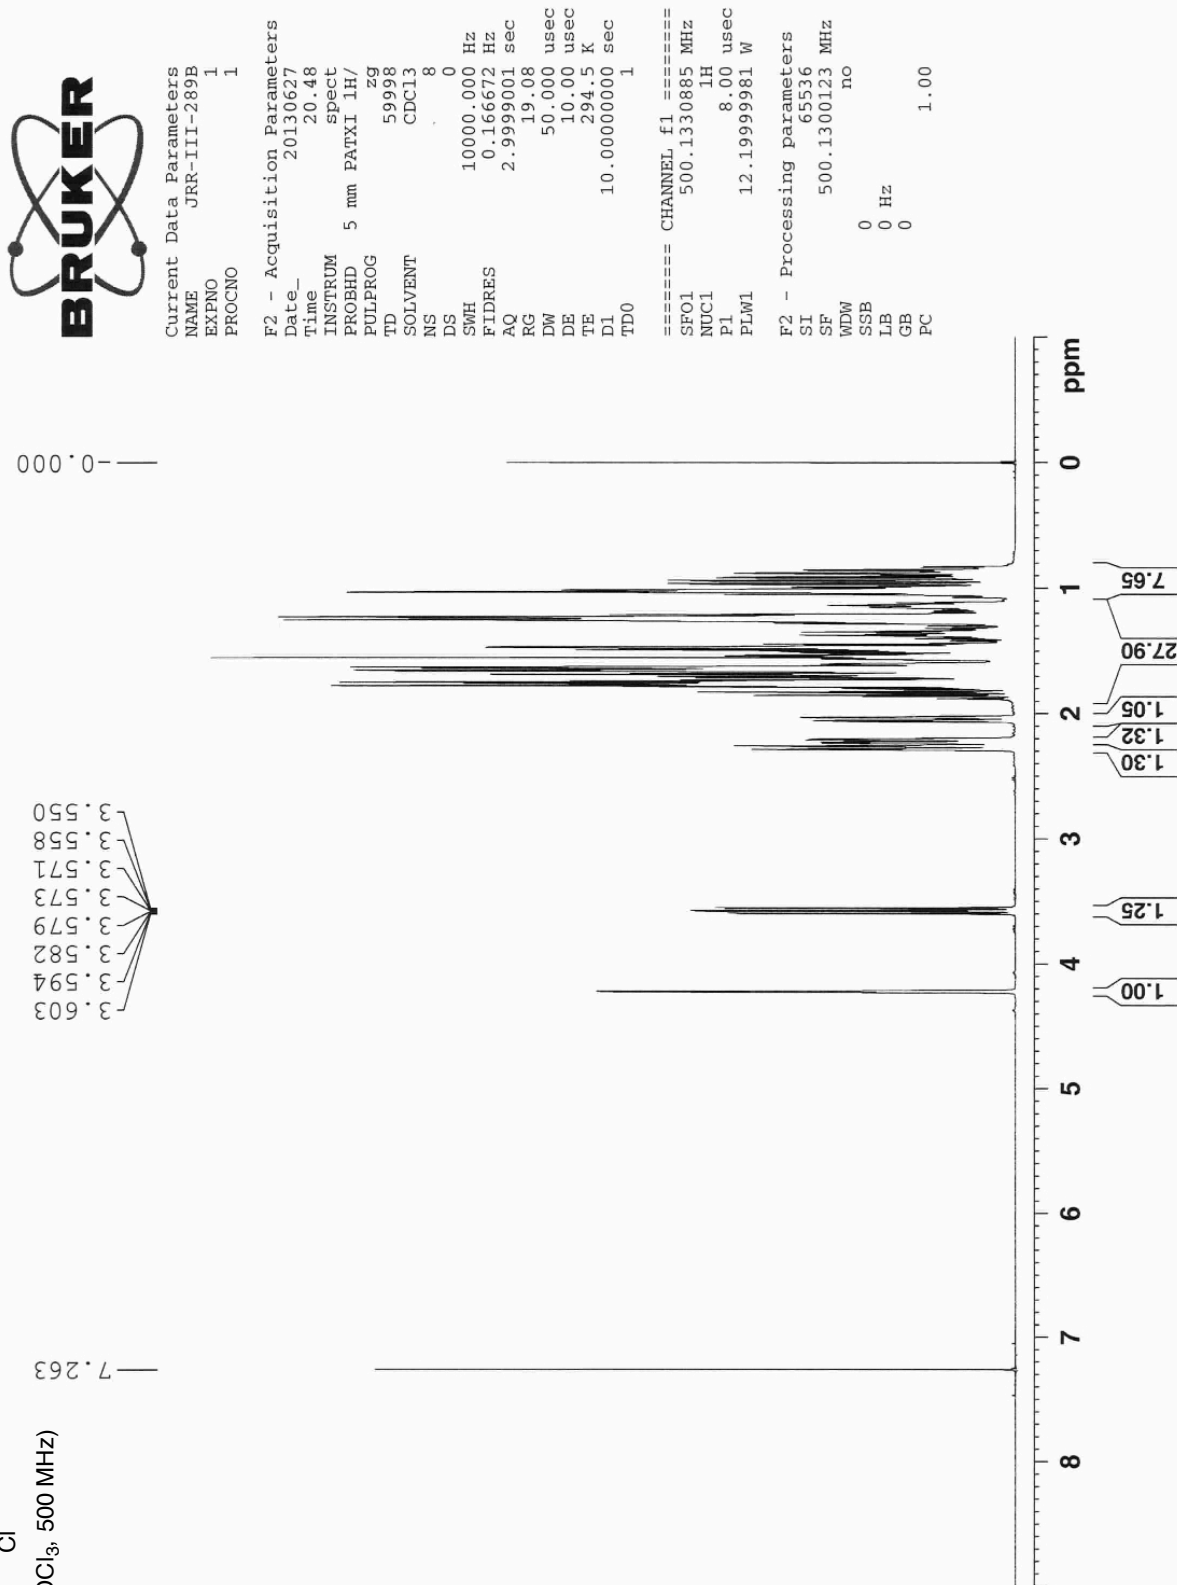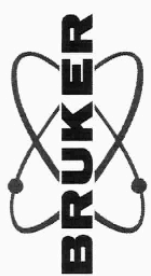

Current Data Parameters  
 NAME JRR-III-289B  
 EXPNO 1  
 PROCNO 1

F2 - Acquisition Parameters  
 Date\_ 20130627  
 Time 20.48  
 INSTRUM spect  
 PROBHD 5 mm PATXI 1H/  
 PULPROG zg  
 TD 59998  
 SOLVENT CDCl3  
 NS 8  
 DS 0  
 SWH 10000.000 Hz  
 FIDRES 0.166672 Hz  
 AQ 2.9999001 sec  
 RG 19.08  
 DW 50.000 usec  
 DE 10.00 usec  
 TE 294.5 K  
 D1 10.00000000 sec  
 TD0 1

==== CHANNEL f1 =====  
 SFO1 500.1330885 MHz  
 NUC1 1H  
 P1 8.00 usec  
 PLW1 12.19999981 W

F2 - Processing parameters  
 SI 65536  
 SF 500.1300123 MHz  
 WDW no  
 SSB 0  
 LB 0 Hz  
 GB 0  
 PC 1.00

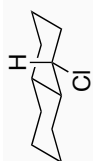

**13e** (CDCl<sub>3</sub>, 125 MHz)

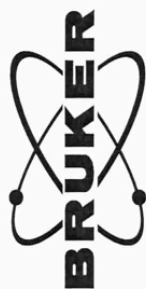

```

Current Data Parameters
NAME      JRR-III-289B
EXPNO    13
PROCNO   1

F2 - Acquisition Parameters
Date_    20130627
Time     21.36
INSTRUM  spect
PROBHD   5 mm QNP 1H/13
PULPROG  zgdc
TD       181814
SOLVENT  CDCl3
NS       561
DS       0
SWH      30303.031 Hz
FIDRES   0.166671 Hz
AQ       2.9999809 sec
RG       18390.4
DW       16.500 usec
DE       7.50 usec
TE       294.7 K
D1       1.0000000 sec
d11      0.0300000 sec
TD0      1

===== CHANNEL f1 =====
NUC1     13C
P1       8.50 usec
PL1      0.00 dB
SFO1     125.7062372 MHz

===== CHANNEL f2 =====
CPDPRG2  waltz16
NUC2     1H
PCPD2    90.00 usec
PL2      1.00 dB
PL12     21.00 dB
SFO2     499.8734991 MHz

F2 - Processing parameters
SI        65536
SF        125.6924188 MHz
WDW       no
SSB       0
LB        0.00 Hz
GB        0
PC        1.40
    
```

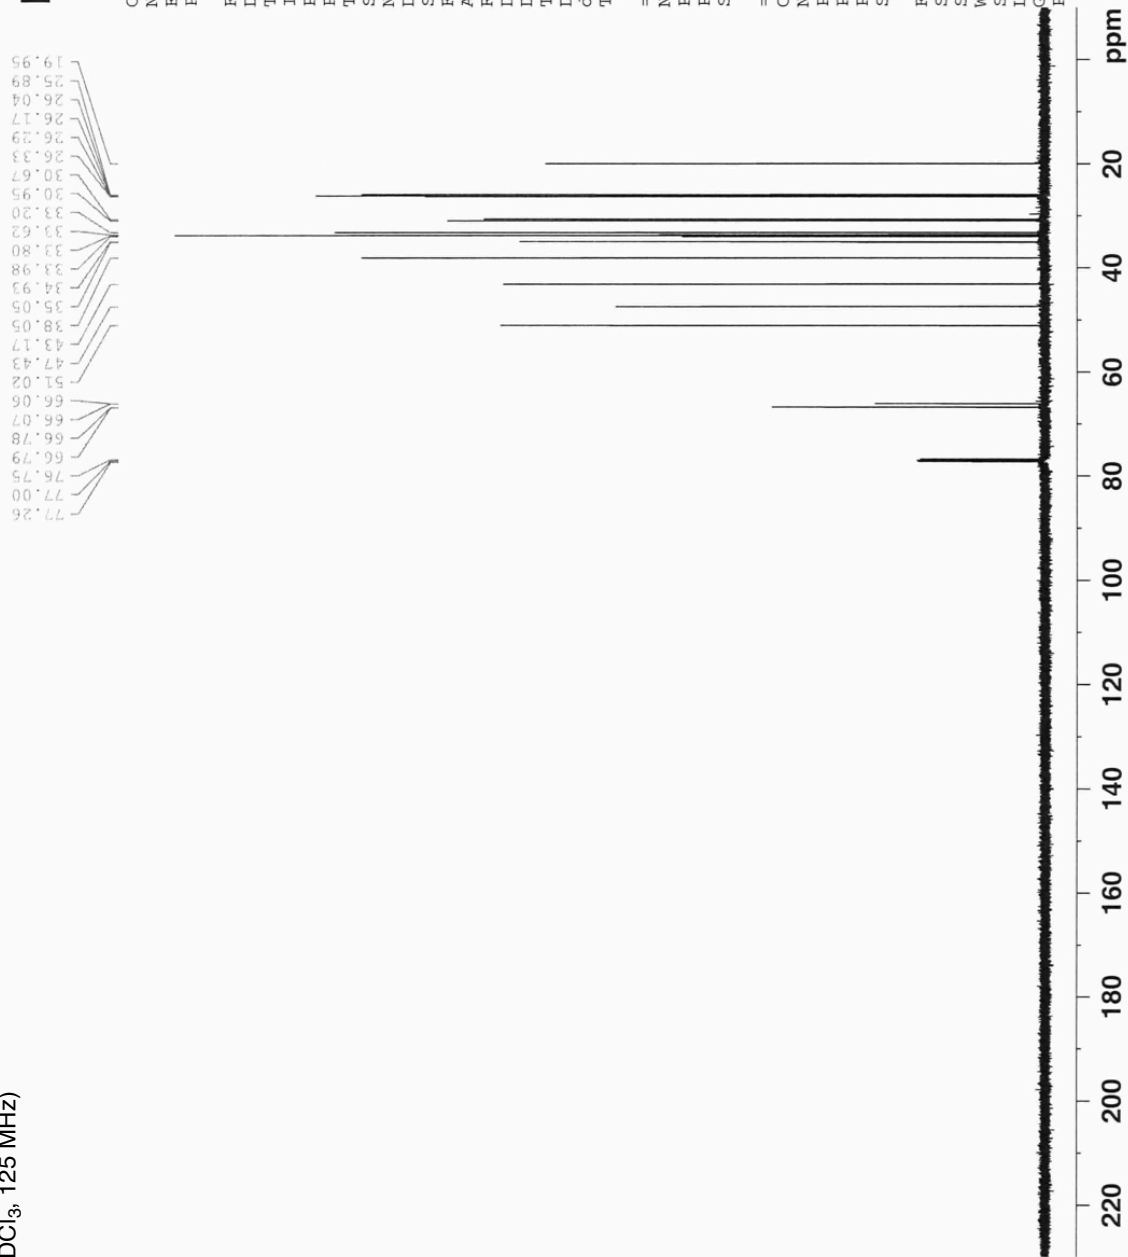

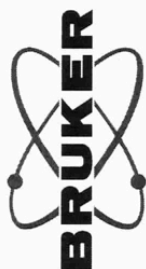

Current Data Parameters  
 NAME JRR-VII-102B  
 EXPNO 1  
 PROCNO 1

F2 - Acquisition Parameters  
 Date\_ 20150309  
 Time\_ 21.54  
 INSTRUM spect  
 PROBHD 5 mm PATXI 1H/  
 PULPROG zg  
 TD 59998  
 SOLVENT CDCl3  
 NS 8  
 DS 0  
 SWH 10000.000 Hz  
 FIDRES 0.166672 Hz  
 AQ 2.9999001 sec  
 RG 37.62  
 DW 50.000 usec  
 DE 10.00 usec  
 TE 295.7 K  
 D1 10.0000000 sec  
 TD0 1

==== CHANNEL f1 =====  
 SFO1 500.1330885 MHz  
 NUC1 1H  
 P1 8.00 usec  
 PLW1 12.19999981 W

F2 - Processing parameters  
 SI 65536  
 SF 500.1300135 MHz  
 WDW no  
 SSB 0  
 LB 0 Hz  
 GB 0  
 PC 1.00

7.261  
6.156  
6.134  
6.120  
6.098  
5.214  
5.213  
5.212  
5.211  
5.192  
5.191  
5.189  
5.189  
5.165  
5.163  
5.130  
5.128  
3.854  
3.845  
3.836  
3.833  
3.824  
3.815  
3.812  
3.803  
3.794  
3.771  
3.763  
3.747  
3.739  
1.165  
0.871  
0.043  
0.037  
0.000

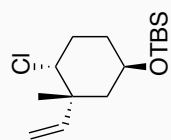

13g (CDCl<sub>3</sub>, 500 MHz)

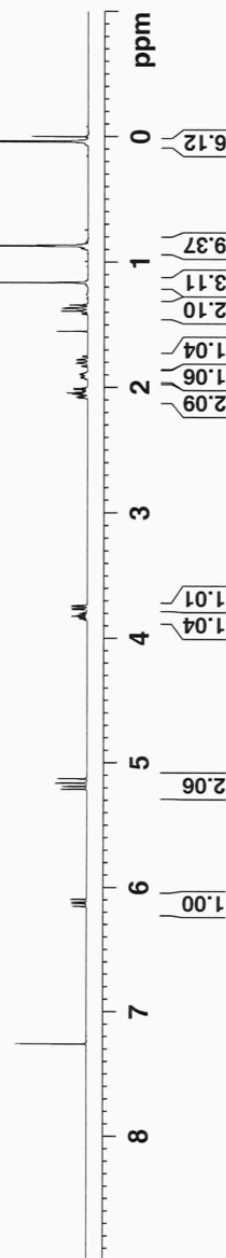



**13g** (CDCl<sub>3</sub>, 125 MHz)

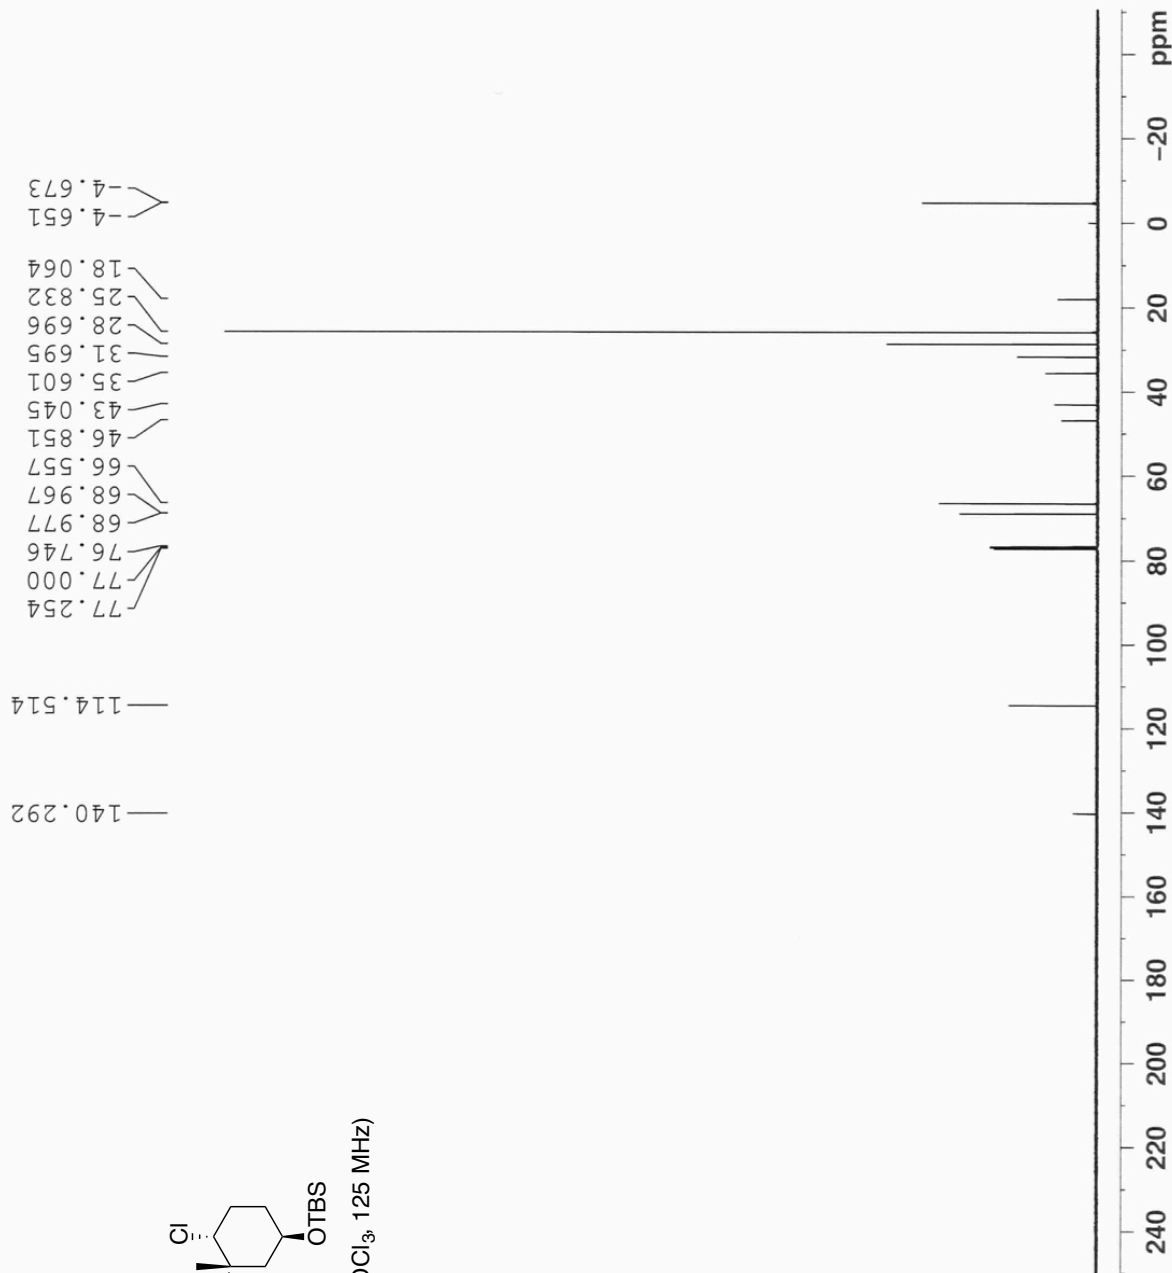

```

Current Data Parameters
NAME      JRR-VII-102B
EXPNO    1
PROCNO   13

F2 - Acquisition Parameter
Date_    20150310
Time     8.26
INSTRUM  spect
PROBHD   5 mm PABBO BB/
PULPROG  zgdc
TD        227268
SOLVENT  CDCl3
NS        9150
DS        0
SWH       37878.789 Hz
FIDRES    0.166670 Hz
AQ         2.9999375 se
RG         2050
DW         13.200 us
DE         6.50 us
TE         299.1 K
D1         1.00000000 se
D11        0.03000000 se
TD0        1

===== CHANNEL f1 =====
SFO1      125.7049802 MH
NUC1       13C
P1         10.00 us
PLW1       72.83999634 W

===== CHANNEL f2 =====
SFO2      499.8724993 MH
NUC2       1H
PCPD2     waltz16
PLW2      80.00 us
PLW12     19.00000000 W
PLW12     0.29688001 W

F2 - Processing parameters
SI         1048576
SF         125.6924104 MH
WDW        no
SSB        0
LB         0 Hz
GB         0
PC         1.40
    
```

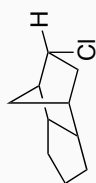

**13h** (CDCl<sub>3</sub>, 500 MHz)

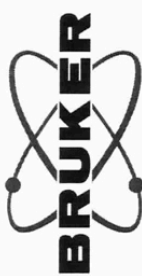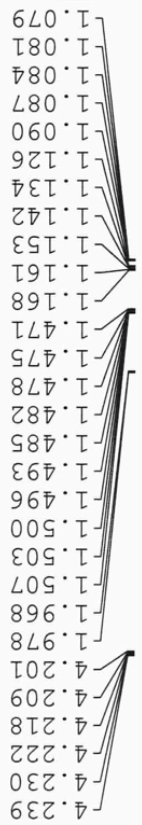

Current Data Parameters  
 NAME JRR-IV-010B  
 EXNO 1  
 PROCNO 1

F2 - Acquisition Parameters  
 Date\_ 20130712  
 Time 3.17  
 INSTRUM spect  
 PROBHID 5 mm PATXI IH/  
 PULPROG zg  
 TD 59998  
 SOLVENT CDCl3  
 NS 8  
 DS 0  
 SMH 10000.000 Hz  
 FIDRES 0.166672 Hz  
 AQ 2.9999001 sec  
 RG 31.72  
 DW 50.000 usec  
 DE 10.00 usec  
 TE 294.9 K  
 D1 10.00000000 sec  
 TD0 1

==== CHANNEL f1 =====  
 SFO1 500.1330885 MHz  
 NUC1 1H  
 P1 8.00 usec  
 PLW1 12.19999981 W

F2 - Processing parameters  
 SI 65536  
 SF 500.1300125 MHz  
 WDW no  
 SSB 0  
 LB 0 Hz  
 GB 0  
 PC 1.00

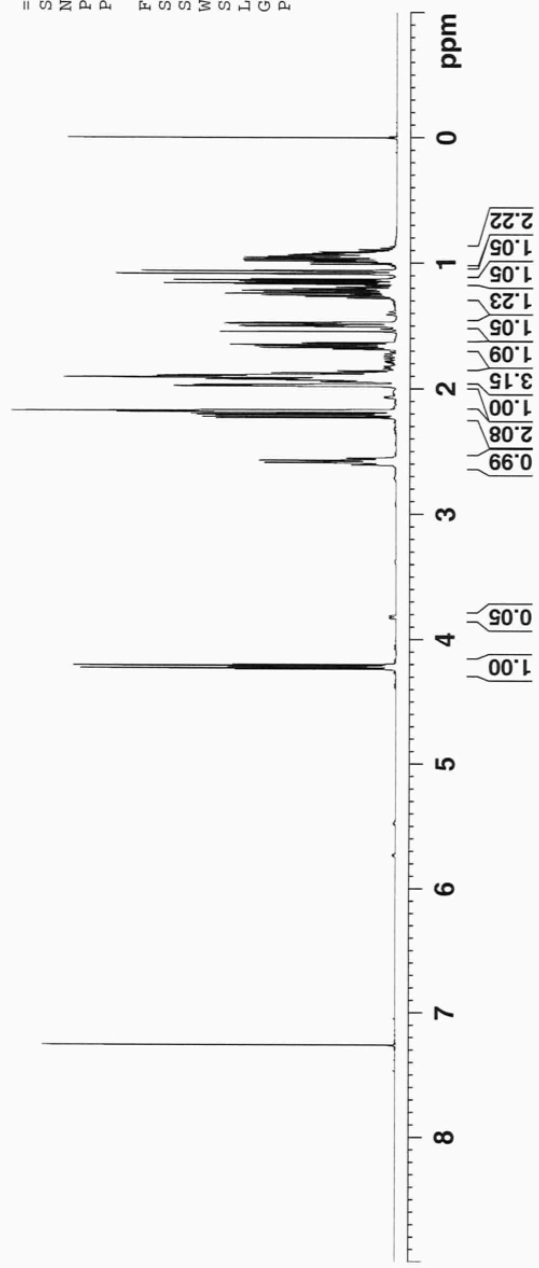



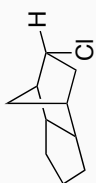

**13h** (CDCl<sub>3</sub>, 125 MHz)

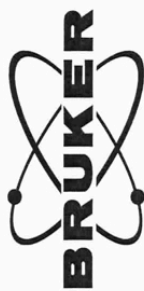

```

Current Data Parameters
NAME      JRR-IV-010B
EXPNO     13
PROCNO    1

F2 - Acquisition Parameters
Date_     20130712
Time      3.39
INSTRUM   spect
PROBHD    5 mm QNP 1H/13
PULPROG   zgdc
TD         181814
SOLVENT   CDCl3
NS         180
DS         0
SMH        30303.031 Hz
FIDRES     0.166671 Hz
AQ         2.9999809 sec
RG         13004
DM         16.500 usec
DE         7.50 usec
TE         294.5 K
D1         1.00000000 sec
d11        0.03000000 sec
TD0        1

===== CHANNEL f1 =====
NUC1       13C
P1         8.50 usec
PL1        0.00 dB
SF01       125.7062372 MHz

===== CHANNEL f2 =====
CPDPRG2    waltz16
NUC2       1H
PCPD2      90.00 usec
PL2        1.00 dB
PL12       21.00 dB
SF02       499.8734991 MHz

F2 - Processing parameters
SI         65536
SF         125.6924199 MHz
WDW        no
SSB        0
LB         0.00 Hz
GB         0
PC         1.40
    
```

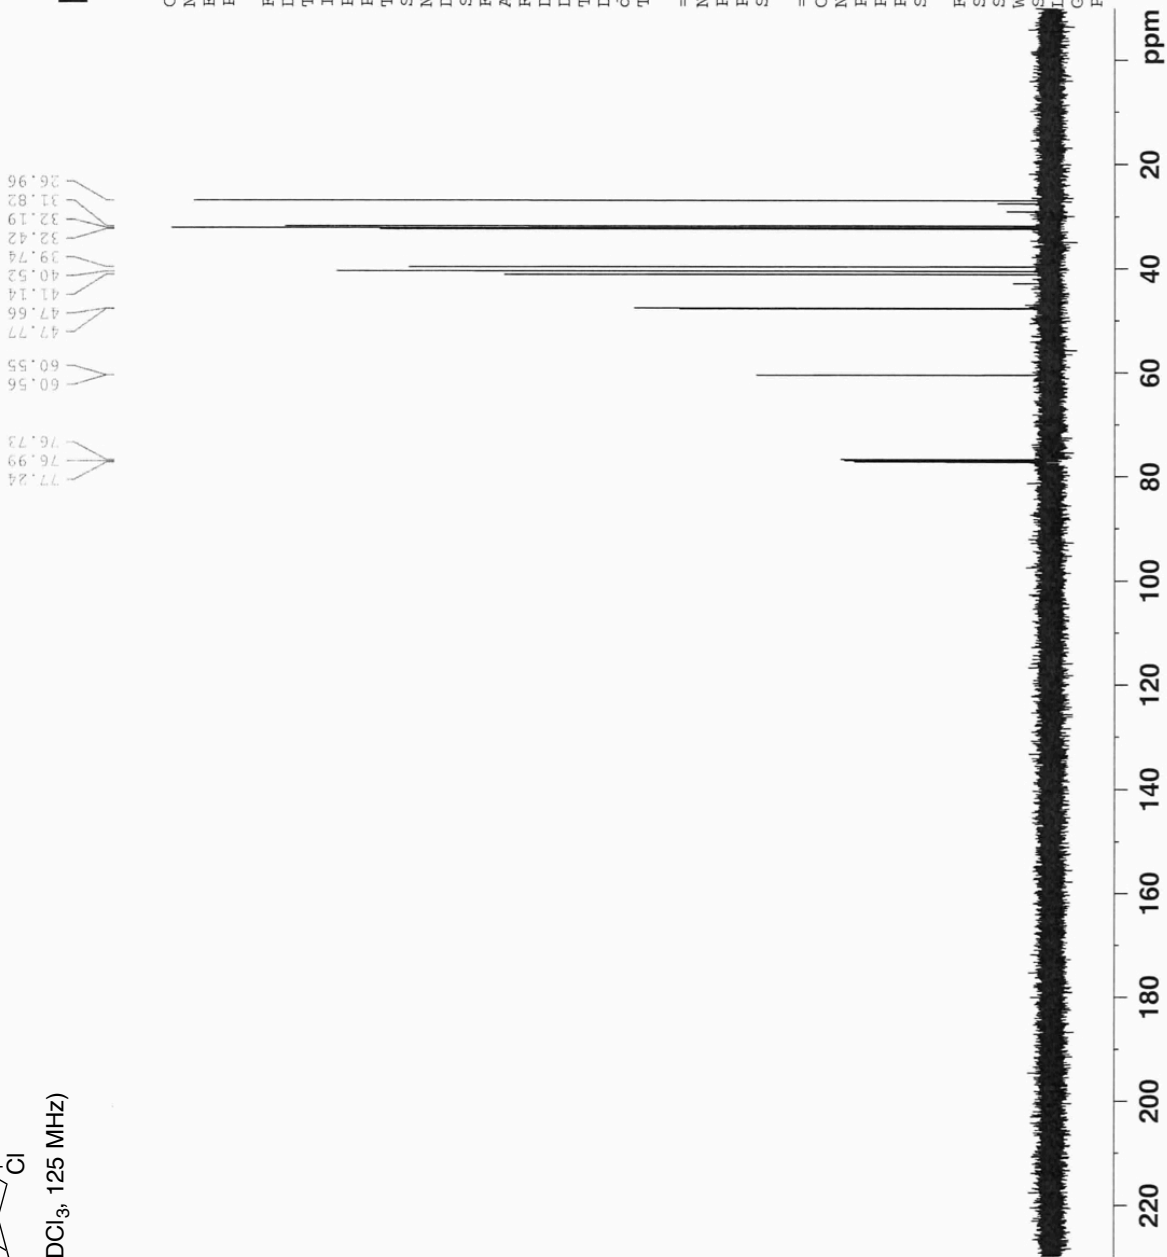

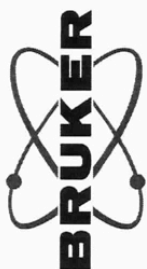

Current Data Parameters  
 NAME JRR-IV-047B  
 EXNO 1  
 PROCNO 1

F2 - Acquisition Parameters  
 Date\_ 20140226  
 Time 20.59  
 INSTRUM spect  
 PROBD 5 mm PATXI 1H/  
 PULPROG zg  
 TD 59998  
 SOLVENT CDCl3  
 NS 8  
 DS 0  
 SWH 10000.000 Hz  
 FIDRES 0.166672 Hz  
 AQ 2.9999001 sec  
 RG 37.62  
 DW 50.000 usec  
 DE 10.00 usec  
 TE 295.7 K  
 D1 10.00000000 sec  
 TD0 1

==== CHANNEL f1 =====  
 SFO1 500.1330885 MHz  
 NUC1 1H  
 P1 8.00 usec  
 PLW1 12.19999981 W

F2 - Processing parameters  
 SI 65536  
 SF 500.1300134 MHz  
 WDW no  
 SSB 0  
 LB 0 Hz  
 GB 0  
 PC 1.00

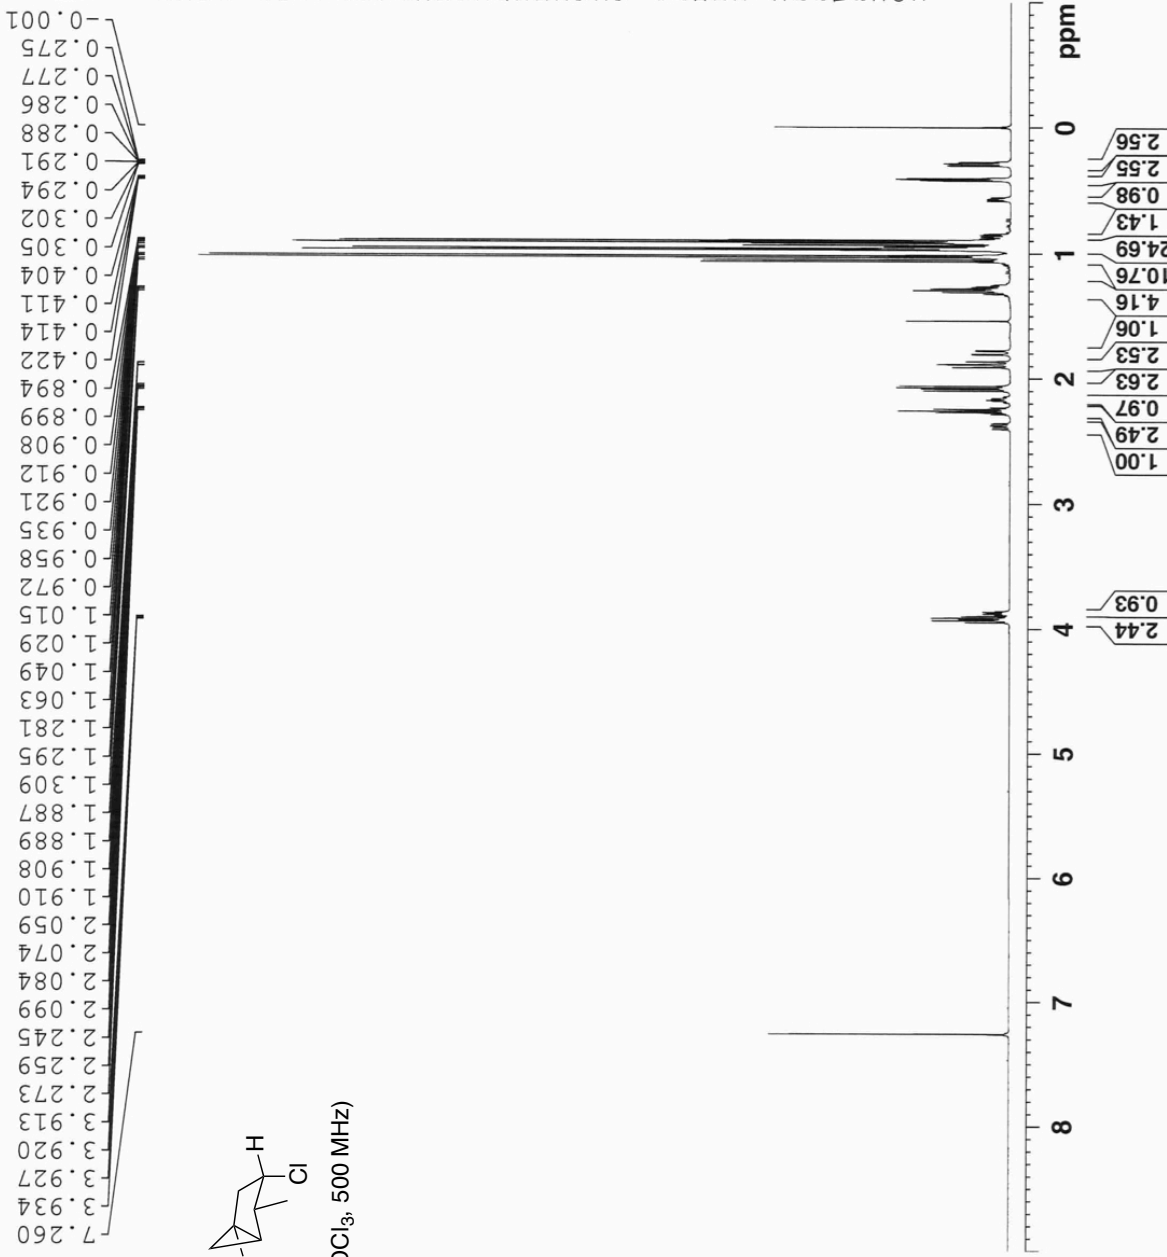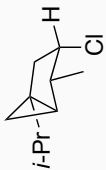

**13i** (CDCl<sub>3</sub>, 500 MHz)

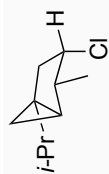

**131** (CDCl<sub>3</sub>, 125 MHz)

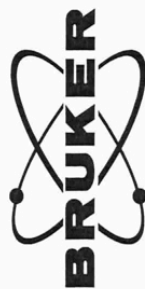

77.24  
76.99  
76.73  
65.55  
65.55  
59.96  
59.95  
46.99  
38.19  
37.87  
35.05  
32.96  
32.29  
29.69  
28.41  
20.10  
20.05  
19.70  
19.56  
18.87  
17.00  
13.52  
13.49  
13.47

Current Data Parameters  
 NAME JRR-IV-016B  
 EXPNO 13  
 PROCNO 1

F2 - Acquisition Parameters  
 Date\_ 20130717  
 Time 19.45  
 INSTRUM spect  
 PROBHD 5 mm QNP 1H/13  
 PULPROG zgpg  
 TD 181814  
 SOLVENT CDCl3  
 NS 436  
 DS 0  
 SMH 30303.031 Hz  
 FIDRES 0.166671 Hz  
 AQ 2.9999809 sec  
 RG 16384  
 DW 16.500 usec  
 DE 7.50 usec  
 TE 294.7 K  
 D1 1.0000000 sec  
 d11 0.0300000 sec  
 TD0 1

==== CHANNEL f1 =====  
 NUC1 13C  
 P1 8.50 usec  
 PL1 0.00 dB  
 SFO1 125.7062372 MHz

==== CHANNEL f2 =====  
 CPDPRG2 waltz16  
 NUC2 1H  
 PCPD2 90.00 usec  
 PL2 1.00 dB  
 PL12 21.00 dB  
 SFO2 499.8734991 MHz

F2 - Processing parameters  
 SI 65536  
 SF 125.6924190 MHz  
 WDW no  
 SSB 0  
 LB 0.00 Hz  
 GB 0  
 PC 1.40

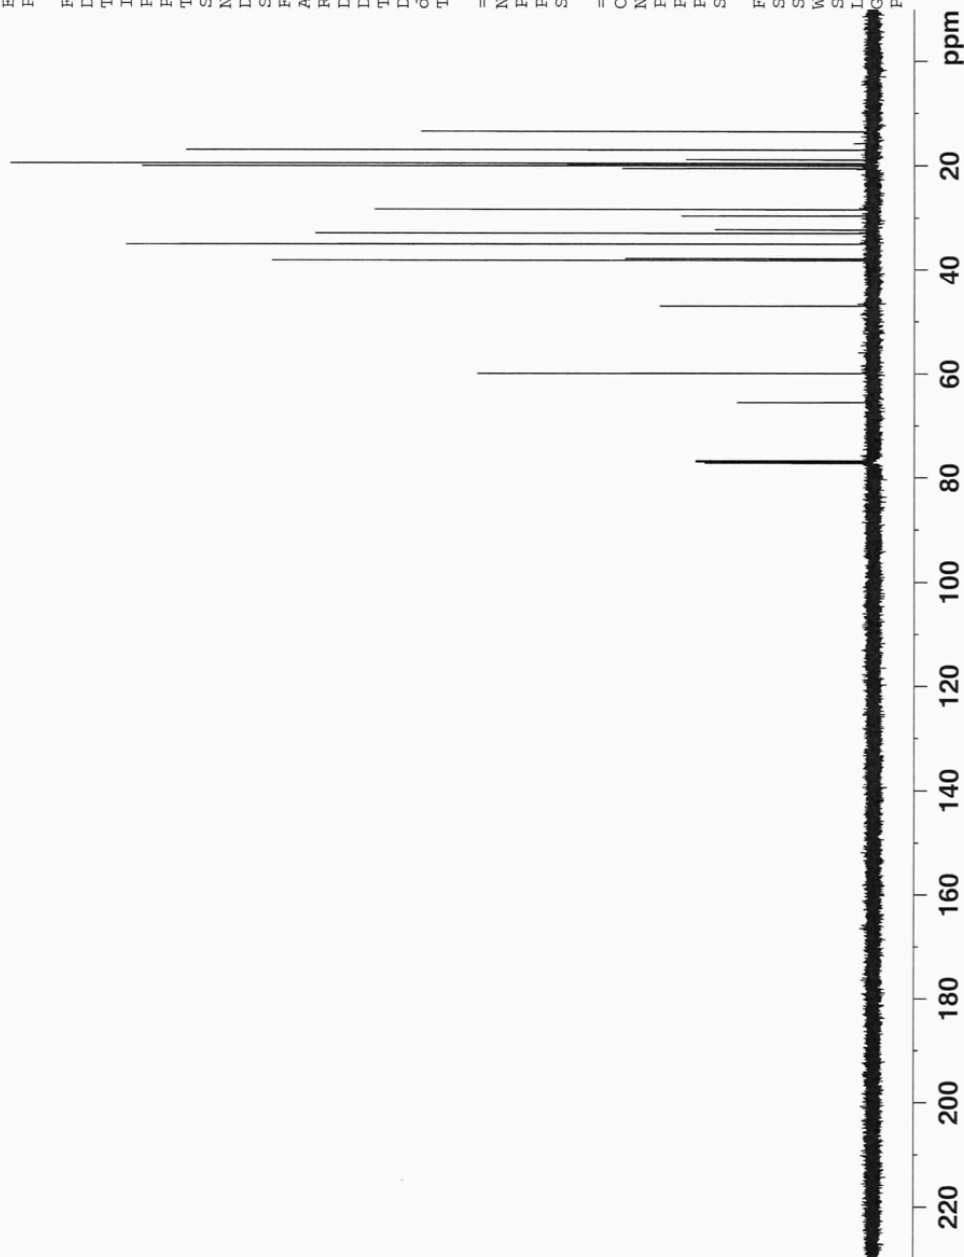

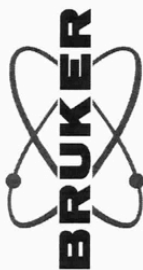

```

Current Data Parameters
NAME          JRR-IV-0474
EXPNO         4
PROCNO        1

F2 - Acquisition Parameters
Date_         20140226
Time          21.34
INSTRUM       spect
PROBHD        5 mm BBO
PULPROG       cosygpspcif
TD            2048
SOLVENT       CDCl3
NS            1
DS            8
SWH           2040.816 Hz
FIDRES        0.395628 Hz
AQ            0.5305286 sec
RG            57.86
DM            245.000 usec
DE            10.00 usec
TE            295.7 K
D0            0.00000300 sec
D1            5.90000010 sec
D13           0.00000000 sec
D16           0.00020000 sec
IN0           0.00049000 sec

===== CHANNEL f1 =====
SF01          500.1310563 MHz
NUC1           1H
P1            8.27 usec
PL1           12.19999961 W

===== GRADIENT CHANNEL =====
GPNAM[1]     SMSQ10.100
GPNAM[2]     SMSQ10.100
GPNAM[3]     SMSQ10.100
GPX1         0 %
GPX2         0 %
GPX3         0 %
GPY1         0 %
GPY2         0 %
GPY3         0 %
GFZ1         16.00 %
GFZ2         12.00 %
GFZ3         40.00 %
F16          1000.00 usec

F1 - Acquisition parameters
TD            128
SF01          500.1311 MHz
FIDRES        15.943877 Hz
SOLVENT       CDCl3
F2MODE        OF

F2 - Processing parameters
SI            1024
SF            500.1300000 MHz
WDW           SINE
SSB           0 Hz
LB            0 Hz
GB            0 Hz
PC            1.00

F1 - Processing parameters
SI            1024
MC2           OF
SF            500.1300000 MHz
WDW           SINE
SSB           0 Hz
LB            0 Hz
GB            0 Hz
    
```

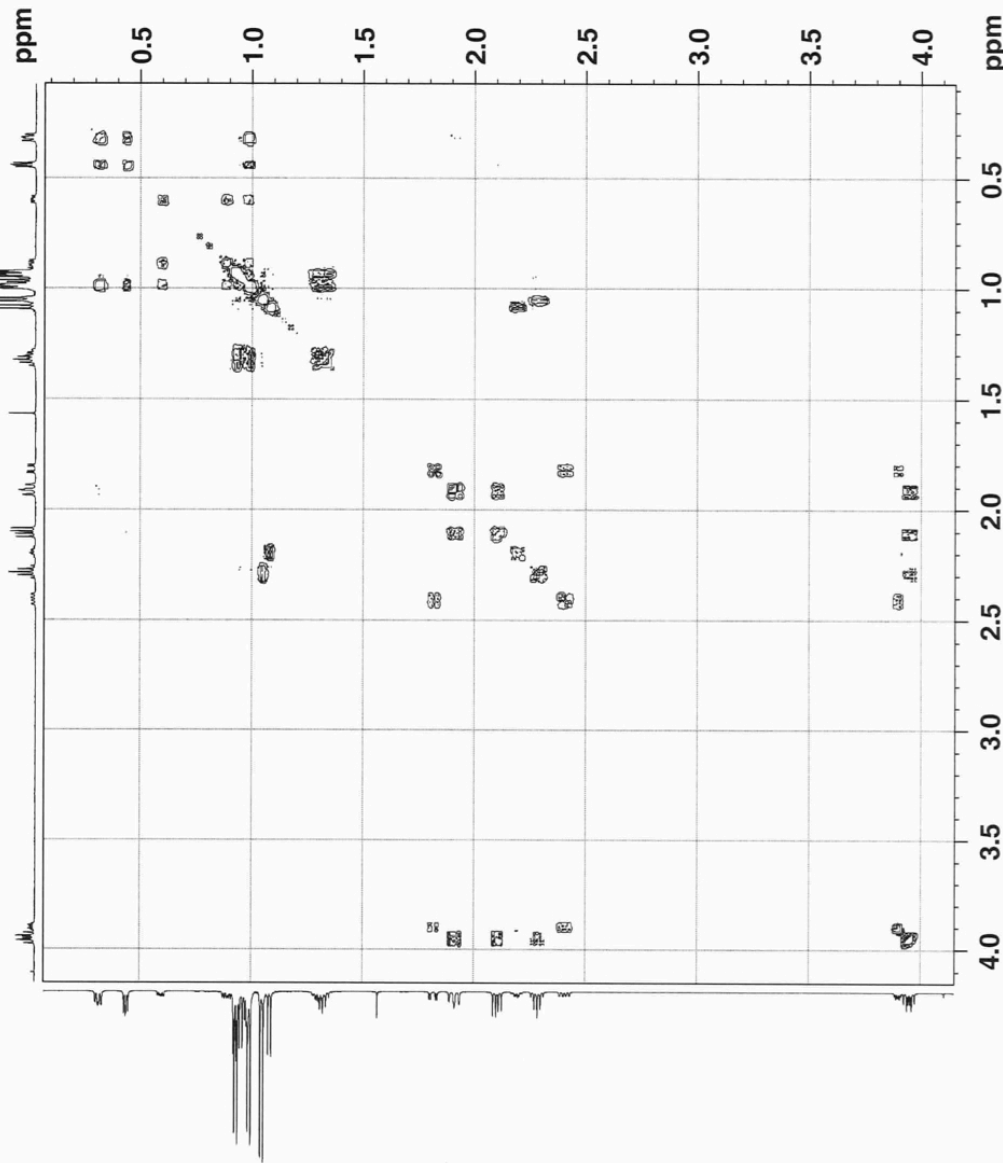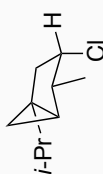

**<sup>131</sup>C - COSY**  
(CDCl<sub>3</sub>, 500 MHz)

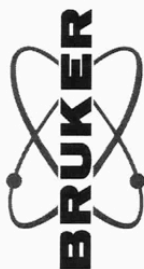

```

Current Data Parameters
NAME      JRF-IV-047B
EXPNO     5
PROCNO    1

F2 - Acquisition Parameters
Date_     20140226
Time      21:55
INSTRUM   spect
PROBHD    5 mm PAXI 1H/
PULPROG   noesygpphpc
TD         2048
SOLVENT   CDCl3
NS         16
DS         8
SWH        2040.81 Hz
AQ          0.996495 sec
RG          0.5017600 sec
RG          52.86
DM          245.000 usec
DE          10.00 usec
TE          295.7 K
D0          0.00023446 sec
D1          5.90000010 sec
D8          3.35999990 sec
D11         0.05000000 sec
D12         0.05000000 sec
D16         0.00020000 sec
T1          0.00000000 sec
T1R        0.00049000 sec

===== CHANNEL f1 =====
SF01      500.1310563 MHz
NUC1       1H
F1         8.27 usec
F2         16.55 usec
FL1        2500.00 usec
PL1        12.1549981 W
PLM10      1.15499997 W

===== GRADIENT CHANNEL =====
GPNAM[1]  SMSQ10.100
GFY1       0 %
GFZ1       0 %
FL6        40.00 %
           1000.00 usec

F1 - Acquisition parameters
CPDPRG2   316
SF01      500.1310563 MHz
ETDRS     15.943877 Hz
SW         4.081 ppm
FMODE     States-TPPI

F2 - Processing parameters
SI         1024
SF         500.1300000 MHz
WDW        QSINE
SSB        0
GB         0
PC         1.00

F1 - Processing parameters
SI         1024
MC2        States-TPPI
SF         500.1300000 MHz
WDW        QSINE
SSB        0
GB         0
    
```

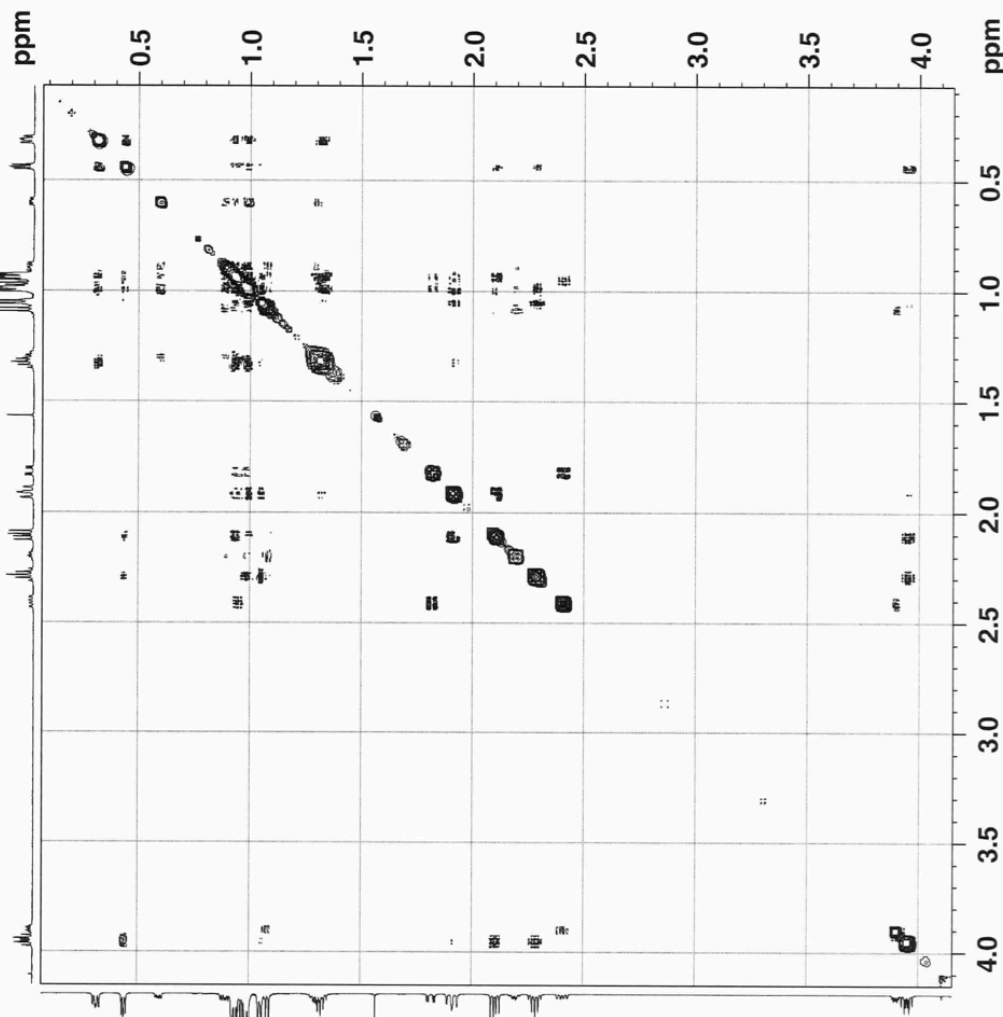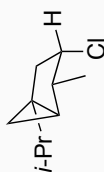

**13i** - NOESY  
(CDCl<sub>3</sub>, 500 MHz)

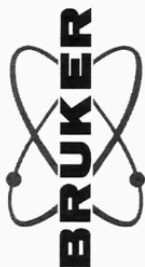

Current Data Parameters  
 NAME JRR-IV-028D  
 EXPNO 1  
 PROCNO 1

F2 - Acquisition Parameters  
 Date\_ 20130725  
 Time 23.25  
 INSTRUM spect  
 PROBHD 5 mm PAXI IH/  
 PULPROG zg  
 TD 59998  
 SOLVENT CDCl3  
 NS 8  
 DS 0  
 SMH 10000.000 Hz  
 FIDRES 0.166672 Hz  
 AQ 2.9999001 sec  
 RG 87.71  
 DW 50.000 usec  
 DE 10.00 usec  
 TE 294.9 K  
 D1 10.00000000 sec  
 TD0 1

==== CHANNEL f1 =====  
 SFO1 500.1330885 MHz  
 NUC1 IH  
 P1 8.00 usec  
 PLW1 12.19999981 W

F2 - Processing parameters  
 SI 65536  
 SF 500.1300150 MHz  
 WDW no  
 SSB 0  
 LB 0 Hz  
 GB 0  
 PC 1.00

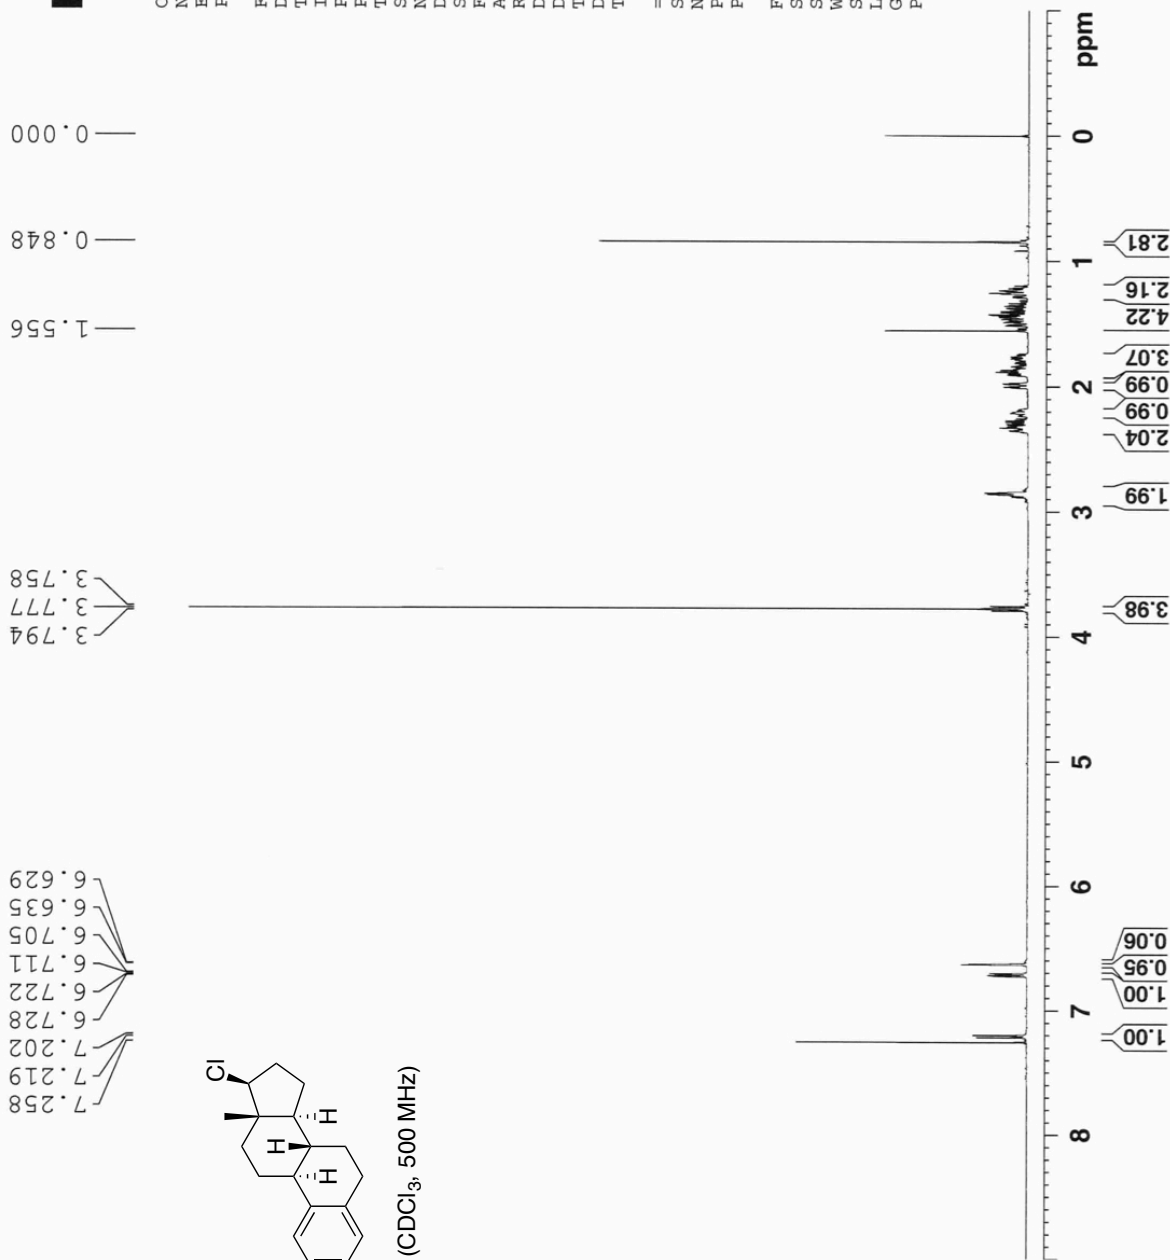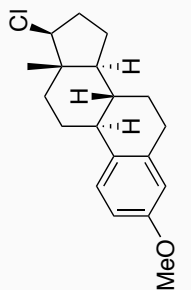

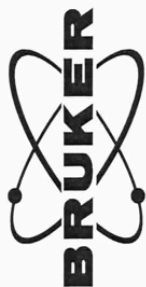

```

Current Data Parameters
NAME      JRR-IV-028Di
EXPNO    13
PROCNO   1

F2 - Acquisition Parameters
Date_    20130726
Time     8.54
INSTRUM spect
PROBHD   5 mm QNP 1H/13
PULPROG zgpgc
TD       181814
SOLVENT  CDCl3
NS       6228
DS       0
SWH      30303.031 Hz
FIDRES   0.166671 Hz
AQ       2.9999809 sec
RG       16384
DW       16.500 usec
DE       7.50 usec
TE       296.4 K
D1       2.00000000 sec
d11      0.03000000 sec
TD0      1

===== CHANNEL f1 =====
NUC1     13C
P1       8.50 usec
PL1     0.00 dB
SFO1    125.7062372 MHz

===== CHANNEL f2 =====
CPDPRG2 waltz16
NUC2     1H
PCPD2   90.00 usec
PL2     1.00 dB
PL12    21.00 dB
SFO2    499.8734991 MHz

F2 - Processing parameters
SI       65536
SF       125.6924181 MHz
WDW      no
SSB      0
LB       0.00 Hz
GB       0
PC       1.40
    
```

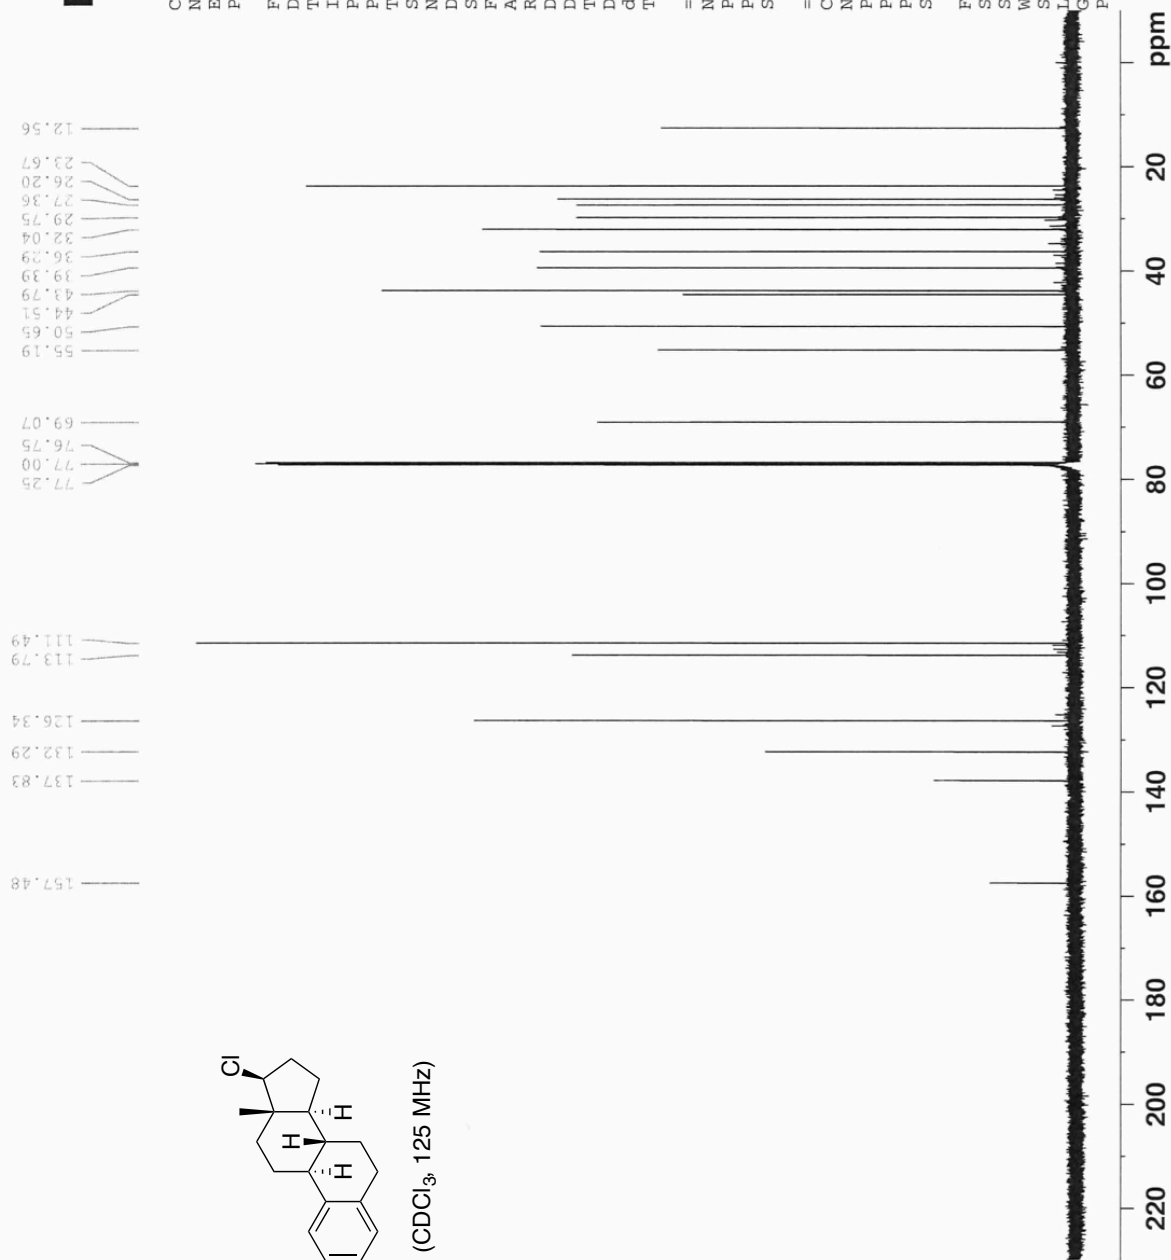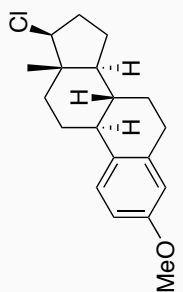

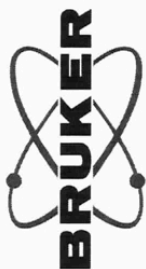

Current Data Parameters  
 NAME JRR-IV-036B  
 EXENO 1  
 PROCNO 1

F2 - Acquisition Parameters  
 Date\_ 20130731  
 Time 18.19  
 INSTRUM spect  
 PROBHD 5 mm PATXI 1H/  
 PULPROG zg  
 TD 59998  
 SOLVENT C6D6  
 NS 8  
 DS 0  
 SWH 10000.000 Hz  
 FIDRES 0.166672 Hz  
 AQ 2.9999001 sec  
 RG 31.72  
 DW 50.000 usec  
 DE 10.00 usec  
 TE 294.9 K  
 D1 10.00000000 sec  
 TD0 1

===== CHANNEL f1 =====  
 SFO1 500.1330885 MHz  
 NUC1 1H  
 P1 8.00 usec  
 PLW1 12.19999981 W

F2 - Processing parameters  
 SI 65536  
 SF 500.1299979 MHz  
 WDW no  
 SSB 0  
 LB 0 Hz  
 GB 0  
 PC 1.00

0.637  
 0.652  
 0.659  
 0.662  
 0.674  
 0.677  
 0.683  
 0.699  
 0.761  
 2.066  
 2.074  
 2.080  
 2.089  
 2.093  
 2.102  
 2.107  
 2.116  
 3.416  
 3.416  
 3.489  
 3.508  
 3.526

6.694  
 6.700  
 6.775  
 6.775  
 6.781  
 6.792  
 6.798  
 6.798  
 7.112  
 7.129  
 7.159

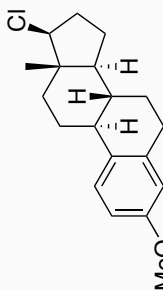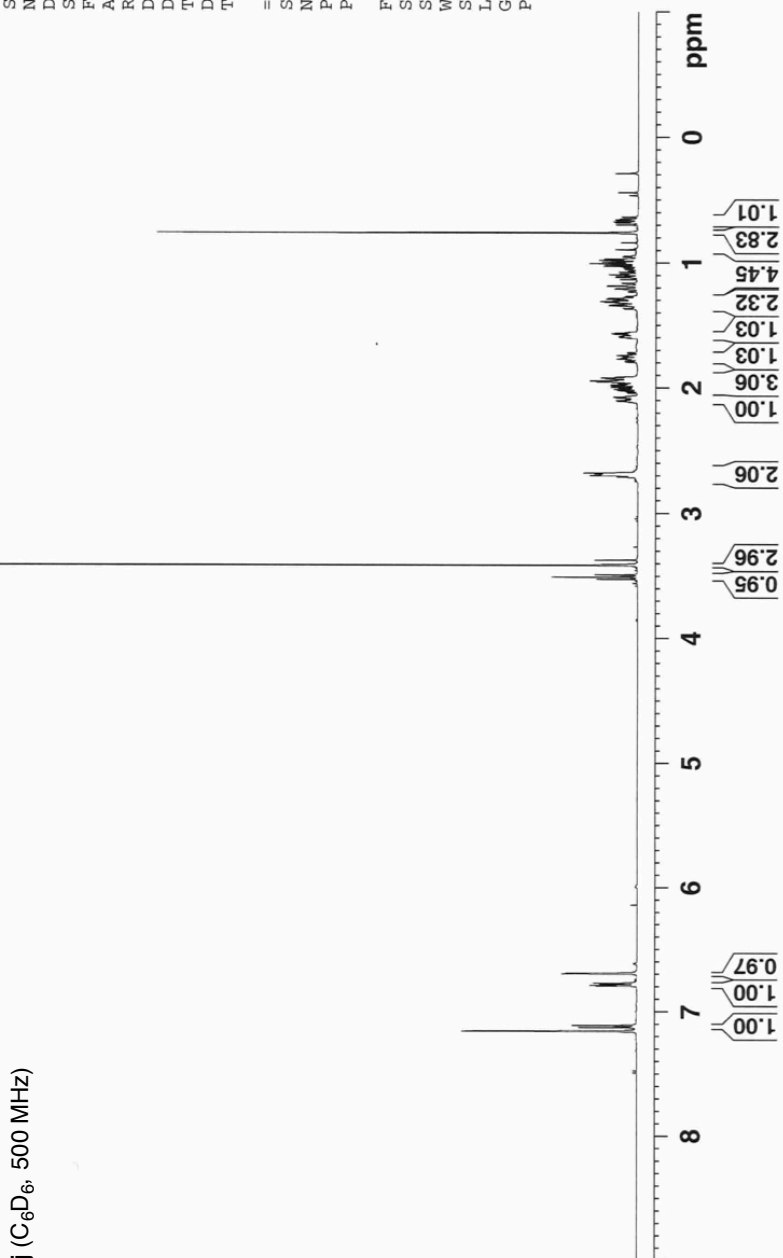



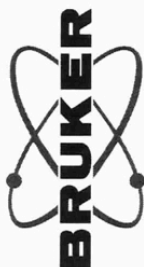

Current Data Parameters  
 NAME JRR-IV-036 C  
 EXPNO 4  
 PROCNO 1

F2 - Acquisition Parameters

Date\_ 20140227  
 Time 21.56  
 INSTRUM spect  
 PULPROG zgpg30  
 PULPROG2 cosyprgf  
 TD 2048  
 SOLVENT C6D6  
 NS 1  
 DS 8  
 SWH 1998.401 Hz  
 FIDRES 0.324096 Hz  
 AQ 0.5212096 sec  
 RG 71.78  
 DW 250.200 usec  
 DE 10.00 usec  
 TE 294.9 K  
 DO 0.00000300 sec  
 D1 2.2999995 sec  
 D11 0.00000000 sec  
 D16 0.00200000 sec  
 INO 0.00050040 sec

===== CHANNEL f1 =====  
 SF01 500.1309993 MHz  
 NUQ1 0 IH  
 F1 12.19999981 W

===== GRADIENT CHANNEL =====

GFNAM(1) SMSQ10.100  
 GFNAM(2) SMSQ10.100  
 GFNAM(3) SMSQ10.100  
 GPC1 0 %  
 GPC2 0 %  
 GPC3 0 %  
 GPC4 0 %  
 GPC5 0 %  
 GPC6 0 %  
 GPC7 0 %  
 GPC8 0 %  
 GPC9 0 %  
 GPC10 0 %  
 GPC11 0 %  
 GPC12 0 %  
 GPC13 0 %  
 GPC14 0 %  
 GPC15 0 %  
 GPC16 0 %  
 GPC17 0 %  
 GPC18 0 %  
 GPC19 0 %  
 GPC20 0 %  
 GPC21 16.00 %  
 GPC22 12.00 %  
 GPC23 40.00 %  
 F16 1000.00 usec

F1 - Acquisition Parameters

TD 256  
 SF01 500.131 MHz  
 FIDRES 7.806255 Hz  
 SW 3.996 ppm  
 FMODE QF

F2 - Processing parameters

SI 1024  
 SF 500.1300000 MHz  
 MDM 0  
 SSB 0 Hz  
 LB 0  
 UB 0  
 PC 1.00

F1 - Processing parameters

SI 1024  
 MC2 QF  
 SF 500.1300000 MHz  
 MDM 0  
 SSB 0 Hz  
 LB 0  
 GB 0

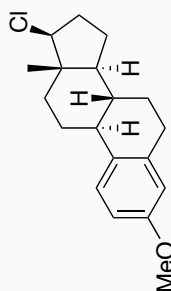

13j - COSY  
 (C<sub>6</sub>D<sub>6</sub>, 500 MHz)

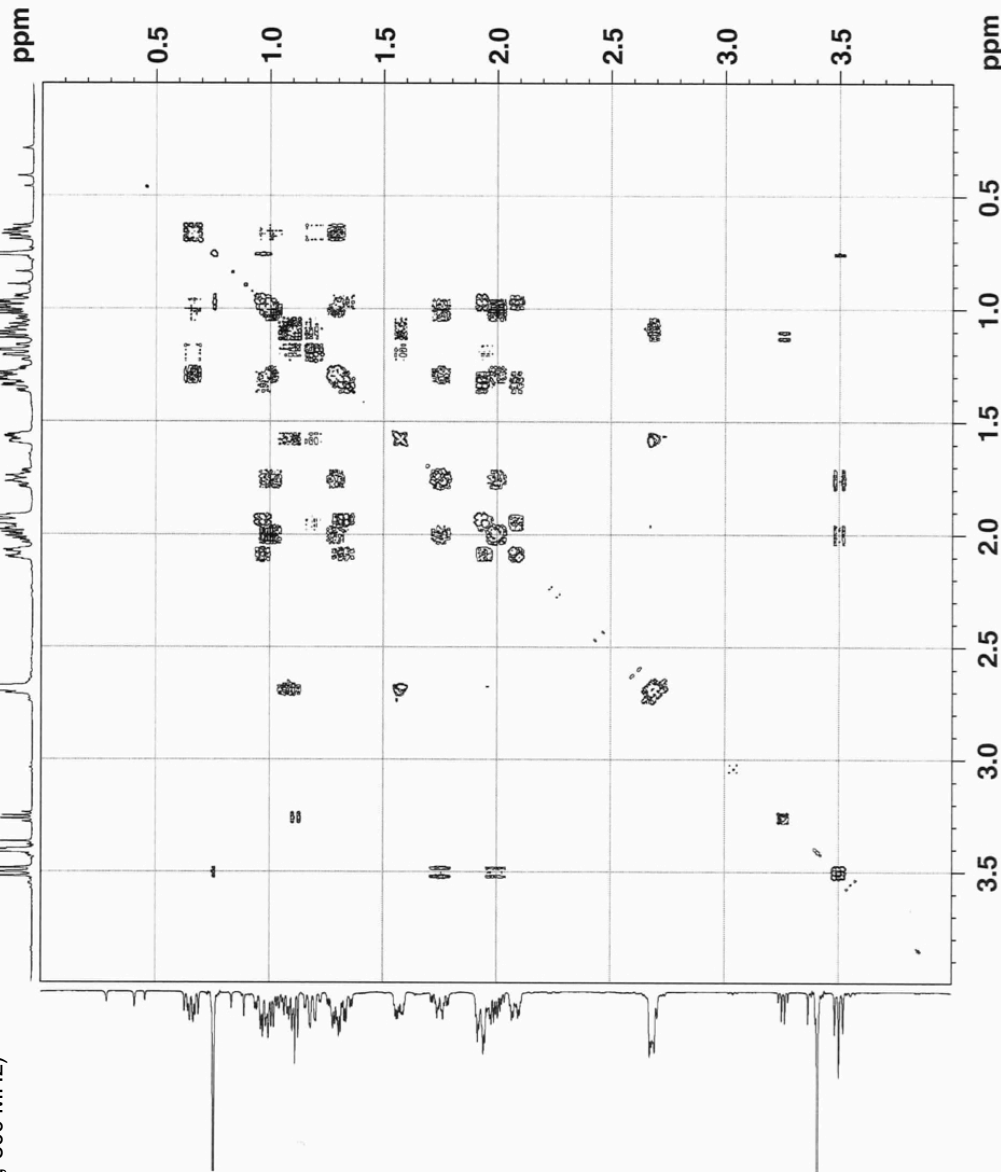

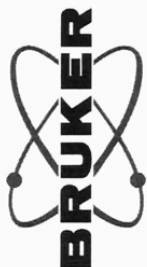

```

Current Data Parameters
NAME      JRR-IV-036C
EXPNO    5
PROCNO   1

F2 - Acquisition Parameters
Date_    20140227
Time     22.18
INSTRUM  spect
PROBHD   5 mm PAXXI LH/
PULPROG  noesygpph
TD        2048
SOLVENT  C6D6
NS        16
DS        4
SWH       1998.401 Hz
FIDRES   0.975782 Hz
AQ        0.5124096 sec
RG        71.78
DW        250.200 usec
DE        10.00 usec
TE        294.8 K
DO        0.00023865 sec
DA        2.2399995 sec
DL        0.0100000 sec
D11       0.0100000 sec
D12       0.0002000 sec
D16       0.0002000 sec
IN0       0.00050040 sec

===== CHANNEL f1 =====
SFO1     500.1309993 MHz
NUC1     1H
P1       9.07 usec
PL1      2500.0 usec
PL12     12.19999981 W
PL10     1.15499997 W

===== GRADIENT CHANNEL =====
GF1      0 %
GF2      0 %
GF3      40.00 %
F16      1000.00 usec

F1 - Acquisition parameters
TD        256
SFO1     500.131 MHz
FIDRES   7.806255 Hz
SW        3.996 PPM
FMODE    States-TPPI

F2 - Processing parameters
SI        1024
SF        500.1300000 MHz
SOLVENT  C6D6
AQ        0.5124096 sec
RG        71.78
DE        10.00 usec
TE        294.8 K
PC        1.00

F1 - Processing parameters
SI        1024
SF        500.1300000 MHz
SOLVENT  C6D6
AQ        0.5124096 sec
RG        71.78
DE        10.00 usec
TE        294.8 K
PC        1.00
    
```

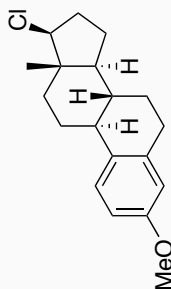

**13j** - NOESY  
(C<sub>6</sub>D<sub>6</sub>, 500 MHz)

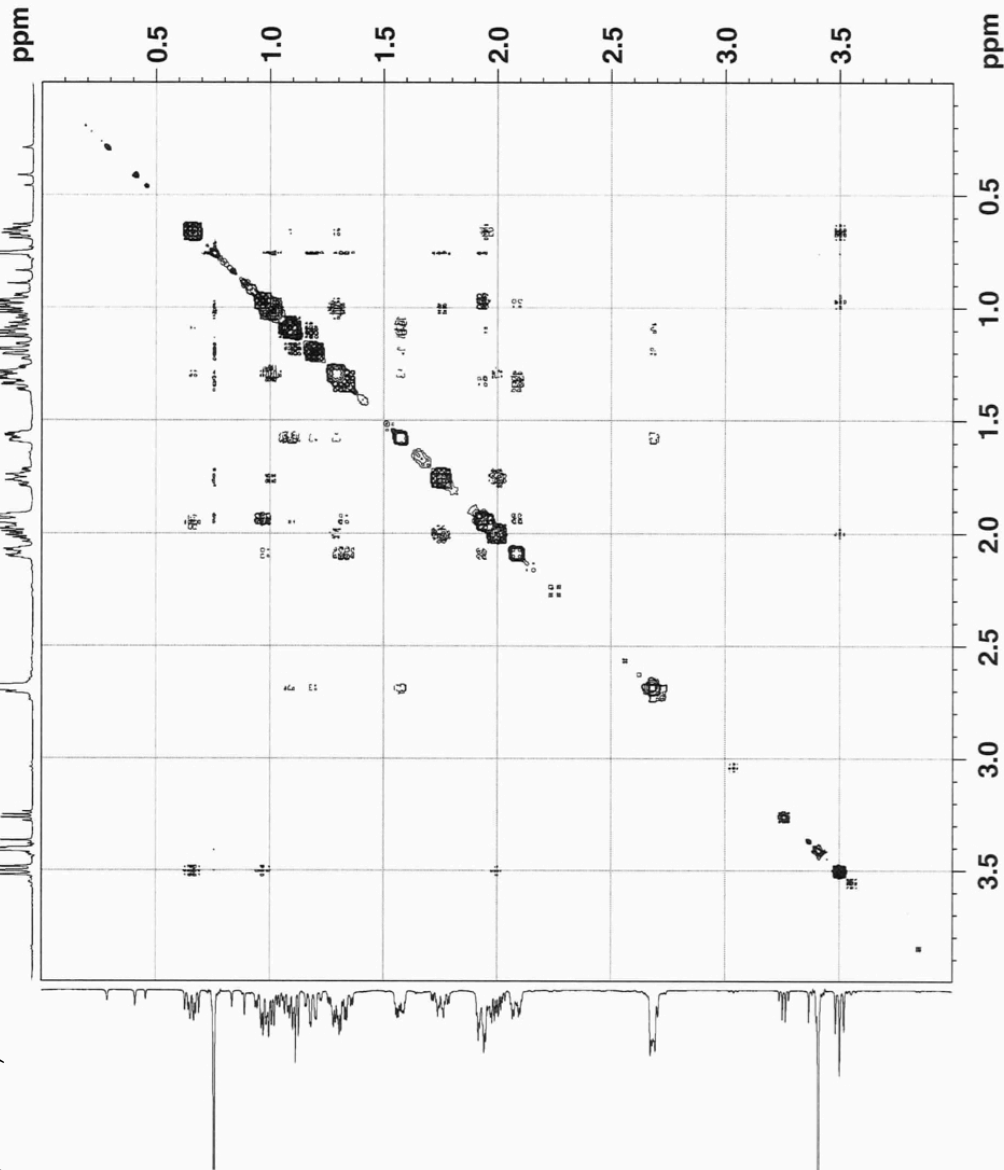

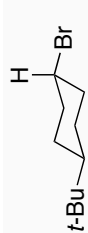

**16d** (CDCl<sub>3</sub>, 500 MHz)

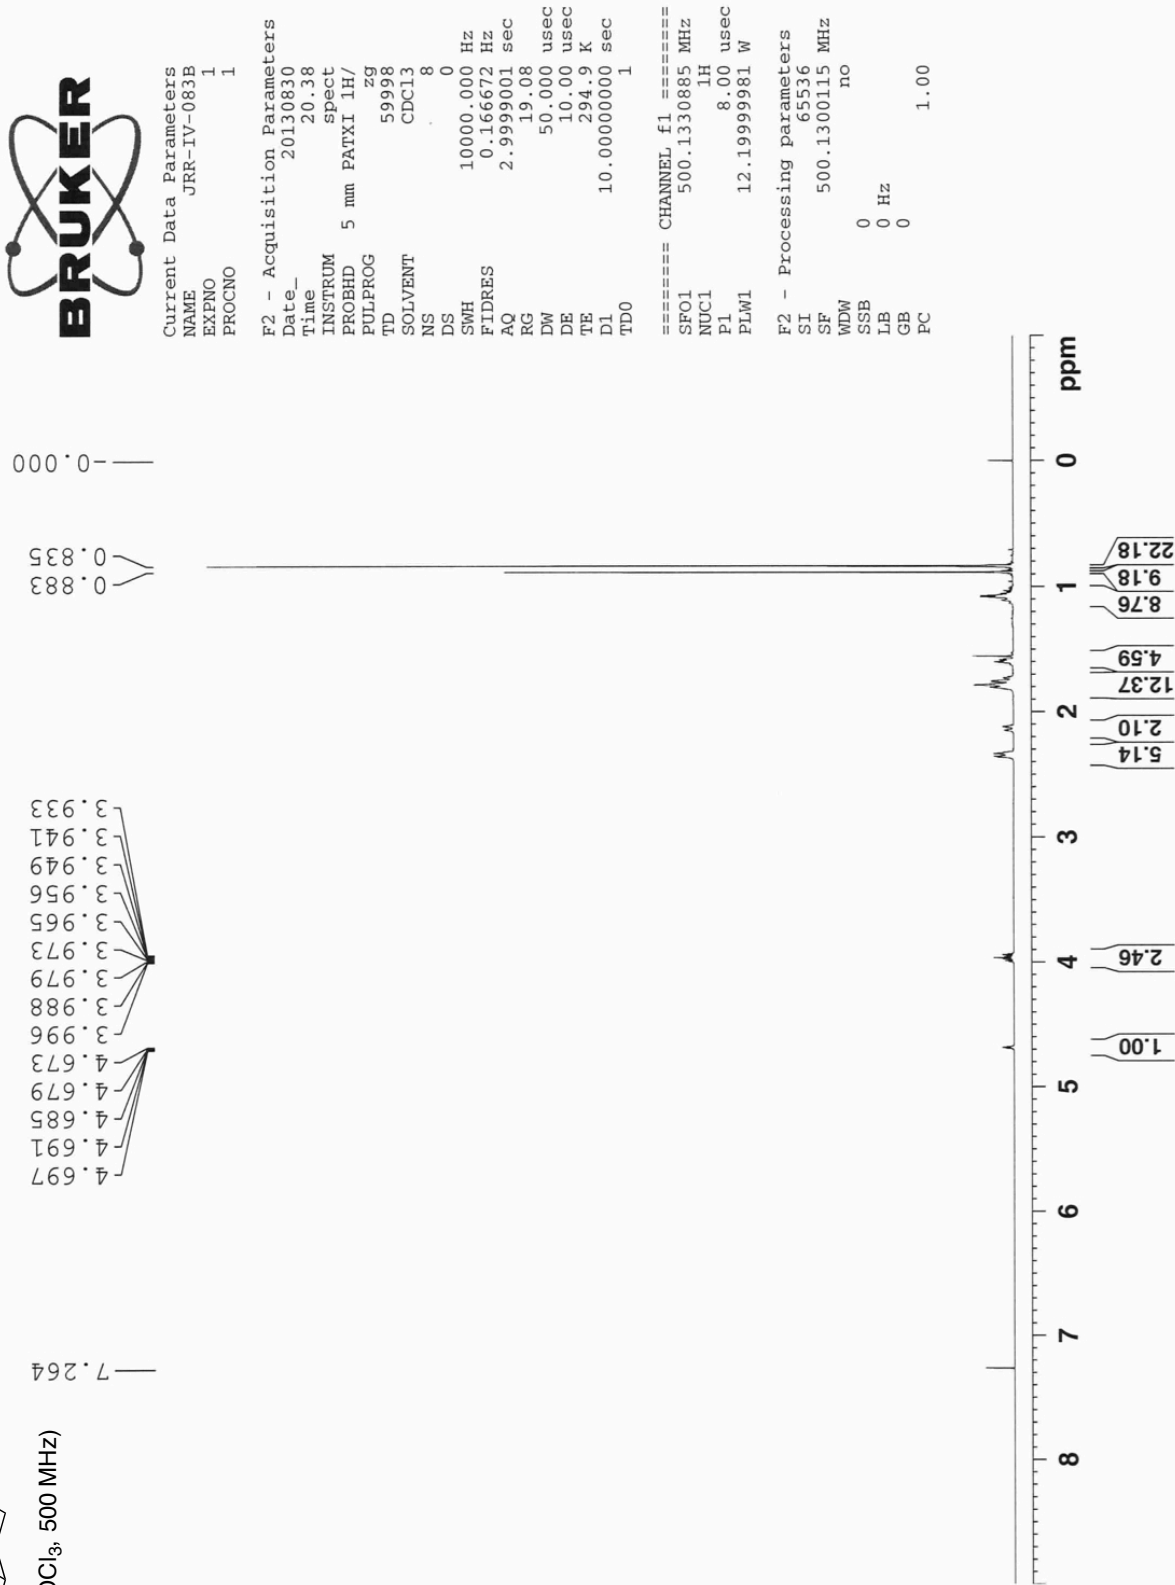

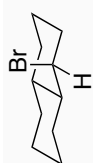

**16e** (CDCl<sub>3</sub>, 500 MHz)

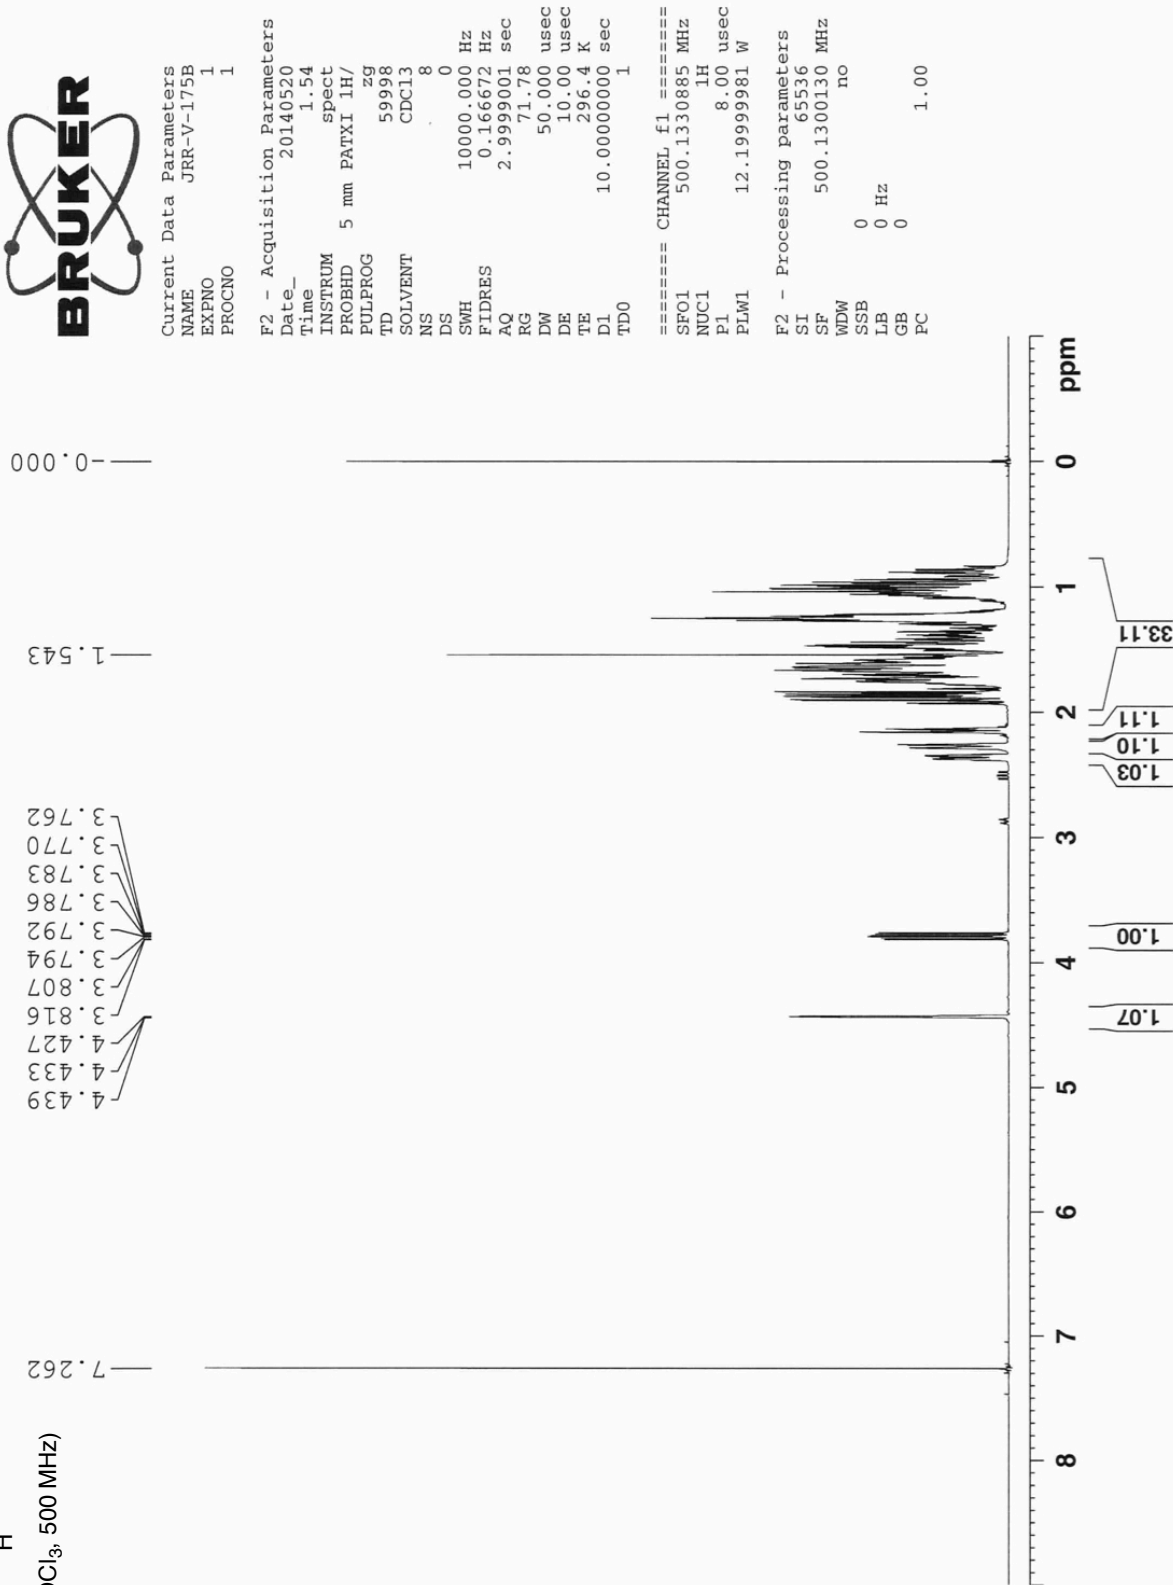

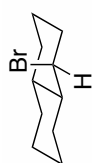

**16e** (CDCl<sub>3</sub>, 125 MHz)

18.00  
17.26  
77.00  
76.75  
63.02  
61.50  
91.43  
47.57  
48.08  
49.36  
39.79  
39.68  
34.01  
16.19  
13.68  
13.37  
12.67  
32.47  
69.77  
77.00  
77.00  
84.47  
93.96  
61.50  
50.97  
18.00

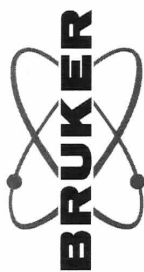

Current Data Parameters  
NAME JRR-V-175B  
EXPNO 2  
PROCNO 1

F2 - Acquisition Parameters  
Date\_ 20140520  
Time 2.40  
INSTRUM spect  
PROBHD 5 mm PATXI 1H/  
PULPROG zgdc  
TD 227268  
SOLVENT CDC13  
NS 575  
DS 0  
SWH 37878.789 Hz  
FIDRES 0.166670 Hz  
AQ 2.9999375 sec  
RG 196.79  
DW 13.200 usec  
DE 10.00 usec  
TE 296.7 K  
D1 1.00000000 sec  
D11 0.03000000 sec  
TD0 1

==== CHANNEL f1 =====  
SFO1 125.7703643 MHz  
NUC1 13C  
P1 14.00 usec  
PLW1 170.00000000 W  
  
==== CHANNEL f2 =====  
SFO2 500.1320005 MHz  
NUC2 1H  
CPDPRG2 waltz16  
PCPD2 90.00 usec  
PLW2 12.19999981 W  
PLW12 0.20893000 W

F2 - Processing parameters  
SI 131072  
SF 125.7577918 MHz  
WDW no  
SSB 0  
LB 0 Hz  
GB 0  
PC 1.40

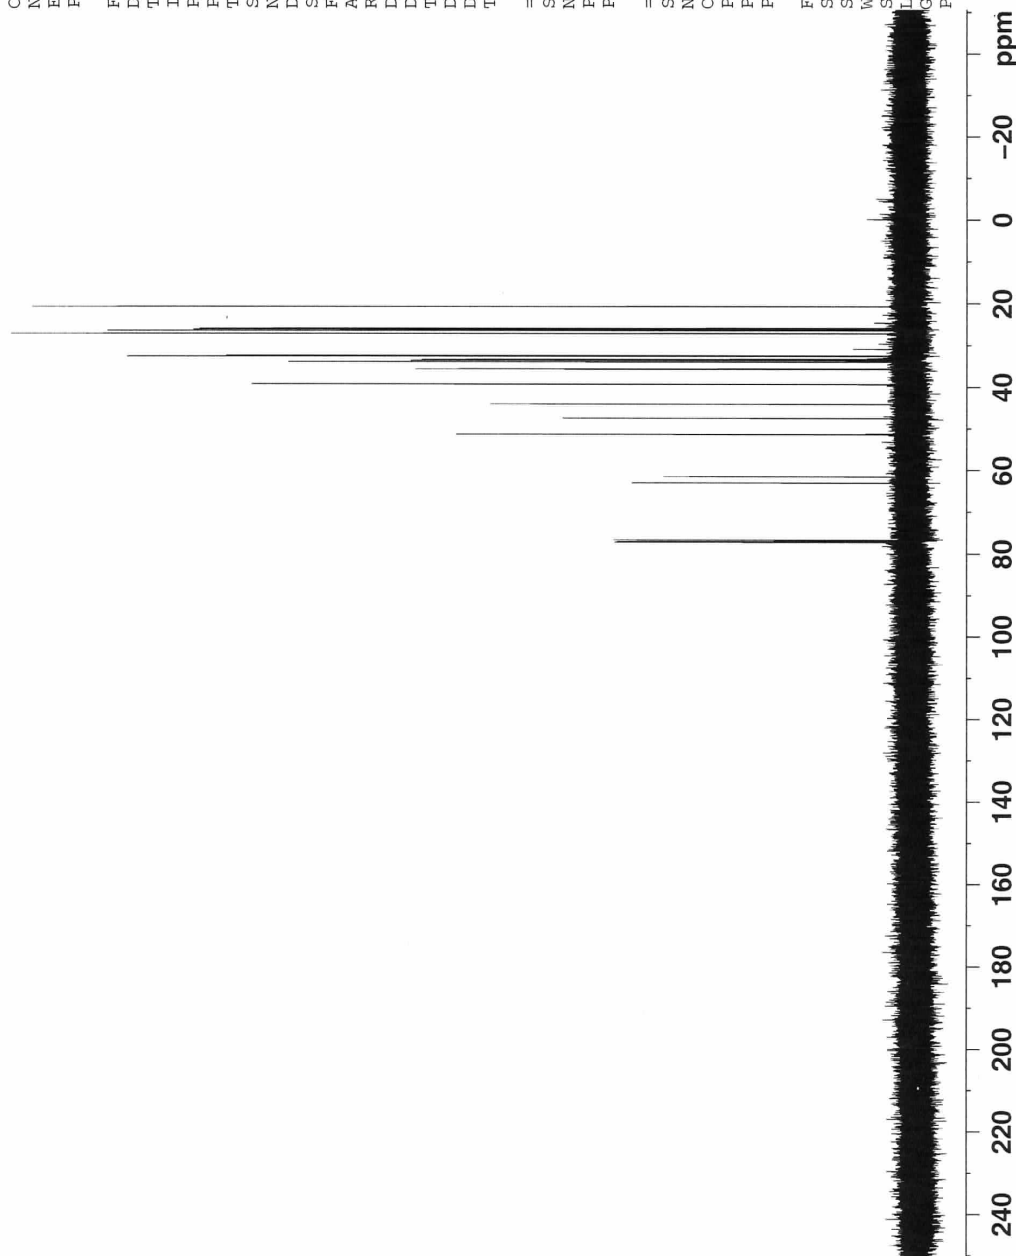



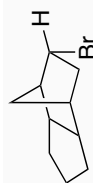

16h (CDCl<sub>3</sub>, 125 MHz)

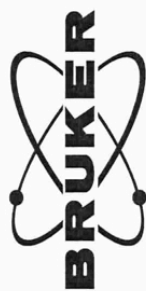

```

Current Data Parameters
NAME      JRR-IV-052Bi
EXPNO    13
PROCNO   1

F2 - Acquisition Parameters
Date_    20130813
Time     19.57
INSTRUM  spect
PROBHD   5 mm QNP 1H/13
PULPROG  zgdc
TD        181814
SOLVENT  CDCl3
NS        54
DS        0
SMH       30303.031 Hz
FIDRES    0.166671 Hz
AQ         2.9999809 sec
RG         16384
DM         16.500 usec
DE         7.50 usec
TE         295.7 K
D1         1.00000000 sec
d11        0.03000000 sec
TD0        1

===== CHANNEL f1 =====
NUC1       13C
P1         8.50 usec
PL1        0.00 dB
SF01       125.7062372 MHz

===== CHANNEL f2 =====
CPDPRG2    waltz16
NUC2       1H
PCPD2      90.00 usec
PL2        1.00 dB
PL12       21.00 dB
SF02       499.8734991 MHz

F2 - Processing parameters
SI          65536
SF          125.6924174 MHz
WDW         no
SSB         0
LB          0.00 Hz
GB          0
PC          1.40
    
```

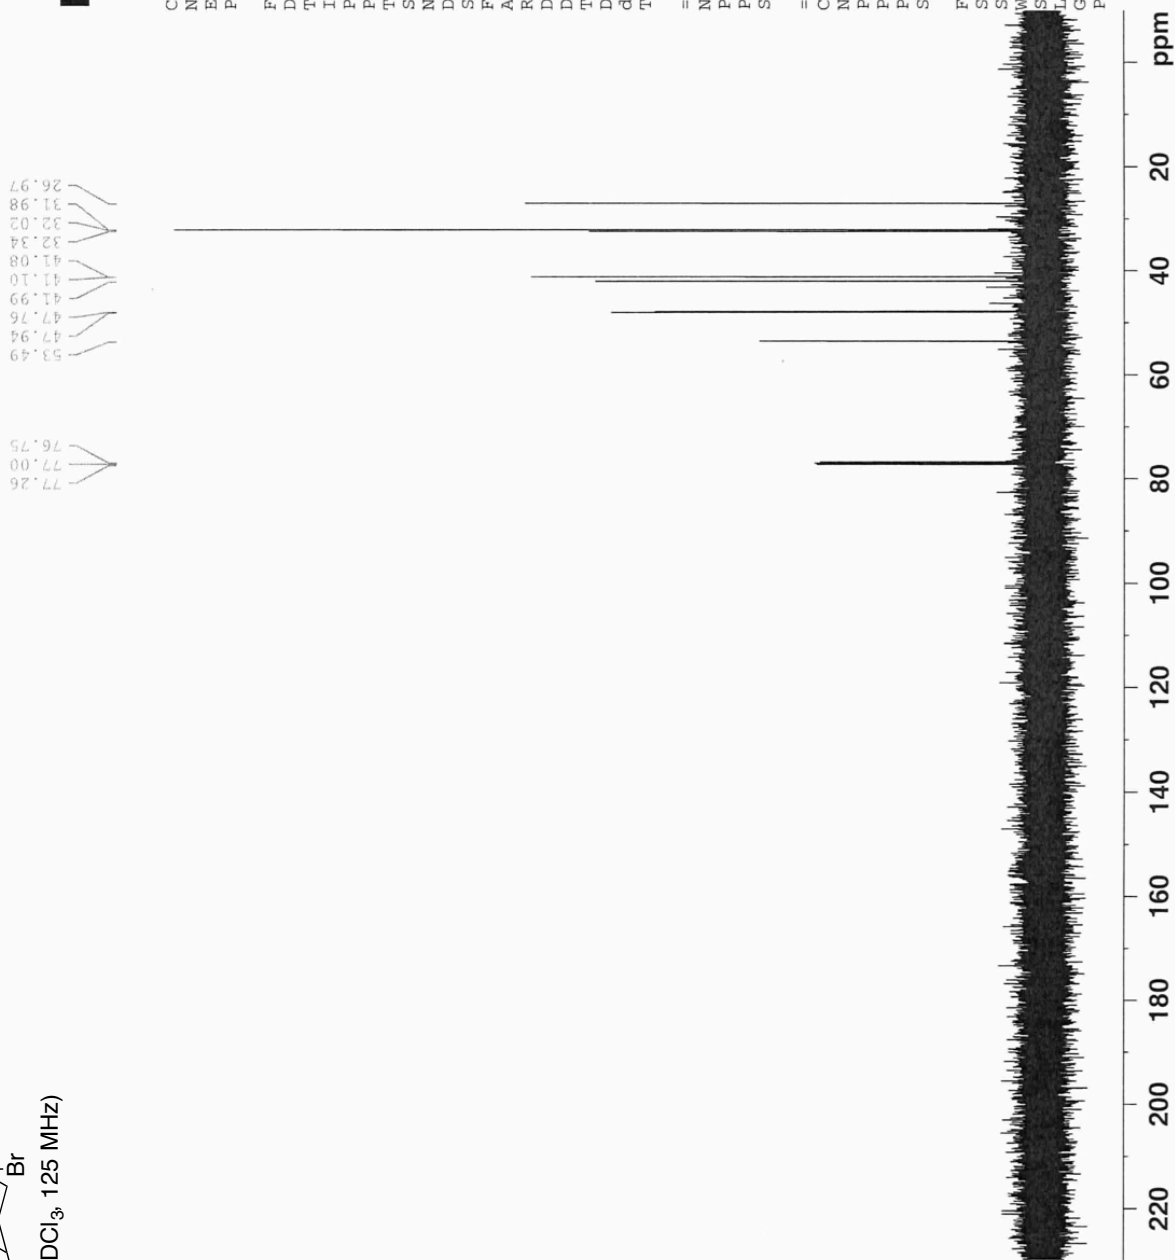

Supplement: NIHMS768904-supplement-Supporting_Information.pdf [file NIHMS768904-supplement-Supporting_Information.pdf]
